# Supplementary material
Source: PubMed Central journal article supplement (PMC4955562)
Supplement: NIHMS802595-supplement-app.pdf [file NIHMS802595-supplement-app.pdf]

## Supplementary Appendix

This appendix has been provided by the authors to give readers additional information about their work.

Supplement to: Ménard D, Khim N, Beghain J, et al. A worldwide map of *Plasmodium falciparum* K13-propeller polymorphisms. N Engl J Med 2016;374:2453-64. DOI: 10.1056/NEJMoa1513137

## Table of contents

---

|                                                                   |    |
|-------------------------------------------------------------------|----|
| Authors' full names, academic degrees and affiliations.....       | 4  |
| Contributors' full names, academic degrees and affiliations ..... | 9  |
| Geospatial mapping methodology, details .....                     | 13 |
| Figure S1.....                                                    | 14 |
| Figure S2.....                                                    | 15 |
| Figure S3.....                                                    | 17 |
| Figure S4.....                                                    | 18 |
| Figure S5.....                                                    | 19 |
| Figure S6.....                                                    | 20 |
| Figure S7.....                                                    | 21 |
| Figure S8.....                                                    | 23 |
| Figure S9.....                                                    | 24 |
| Figure S10.....                                                   | 32 |
| Figure S11 .....                                                  | 34 |
| Figure S12.....                                                   | 35 |
| Figure S13 .....                                                  | 37 |
| Figure S14.....                                                   | 38 |
| <br>                                                              |    |
| Table S1 .....                                                    | 42 |
| Table S2 .....                                                    | 56 |
| Table S3 .....                                                    | 57 |
| Table S4 .....                                                    | 60 |
| Table S5 .....                                                    | 75 |

|                 |     |
|-----------------|-----|
| Table S6 .....  | 78  |
| Table S7 .....  | 79  |
| Table S8 .....  | 90  |
| Table S9 .....  | 100 |
| Table S10 ..... | 117 |

## **Authors' full names, academic degrees and affiliations**

Didier Ménard, Ph.D., Nimol Khim, Ph.D., Johann Beghain, M.Sc., Ayola A. Adegnika, M.D., Ph.D., Mohammad Shafiul-Alam, Ph.D., Olukemi Amodu, Ph.D., Ghulam Rahim-Awab, Ph.D., Céline Barnadas, Ph.D., Antoine Berry, M.D., Ph.D., Yap Boum, Ph.D., Maria D. Bustos, M.D., Ph.D., Jun Cao, Ph.D., Jun-Hu Chen, Ph.D., Louis Collet, M.D., Liwang Cui, Ph.D., Garib-Das Thakur, M.D., Alioune Dieye, Pharm.D., Ph.D., Djibrine Djallé, M.Sc., Monique A. Dorkenoo, M.D., Carole E. Eboumbou-Moukoko, Ph.D., Fe-Esperanza-Caridad J. Espino, M.D., Ph.D., Thierry Fandeur, Ph.D., Maria-de-Fatima Ferreira-da-Cruz, Ph.D., Abebe A. Fola, M.Sc., Hans-Peter Fuehrer, Ph.D., Abdillahi M. Hassan, B.Sc., Socrates Herrera, M.D., Bouasy Hongvanthong, M.D., Sandrine Houzé, M.D., Ph.D., Maman L. Ibrahim, M.V.D., Ph.D., Mohammad Jahirul-Karim, M.B., B.S., Lubin Jiang, Ph.D., Shigeyuki Kano, M.D., Ph.D., Wasif Ali-Khan, M.B., B.S., Maniphone Khanthavong, M.D., Peter G. Kremsner, M.D., Marcus Lacerda, M.D., Ph.D., Rithea Leang, M.D., Mindy Leelawong, Ph.D., Mei Li, Ph.D., Khin Lin, M.D., Jean-Baptiste Mazarati, Ph.D., Sandie Ménard, M.Sc., Isabelle Morlais, Ph.D., Hypolite Muhindo-Mavoko, M.D., Lise Musset, Pharm.D., Ph.D., Kesara Na-Bangchang, Ph.D., Michael Nambozi, M.P.H., Karamoko Niaré, Pharm.D., Harald Noedl, M.D., Ph.D., Jean-Bosco Ouédraogo, M.D., Ph.D., Dylan R. Pillai, M.D., Ph.D., Bruno Pradines, Pharm.D., Ph.D., Bui Quang-Phuc, M.D., Michael Ramharter, M.D., D.T.M.H., Milijaona Randrianarivelojosia, Ph.D., Jetsumon Sattabongkot, Ph.D., Abdiqani Sheikh-Omar, M.D., Kigbafori D. Silué, Ph.D., Sodiomon B. Sirima, M.D., Ph.D., Colin Sutherland, Ph.D., M.P.H., Din Syafruddin, M.D., Ph.D., Rachida Tahar, Ph.D., Lin-Hua Tang, M.D., Ph.D., Offianan A. Touré, Ph.D., Patrick Tshibangu-wa-Tshibangu, M.D., Inès Vigan-Womas, Ph.D., Marian Warsame, M.D., Ph.D., Lyndes Wini, M.B.B.S., Sedigheh Zakeri, Ph.D., Saorin Kim, B.S., Rotha Eam, B.S., Laura Berne, M.Sc.,

Chanra Khean, B.S., Sophy Chy, B.S., Malen Ken, B.S., Kaknika Loch, B.S., Lydie Canier, M.Sc., Valentine Duru, M.Sc., Eric Legrand, Ph.D., Jean-Christophe Barale, Ph.D., Barbara Stokes, B.Sc., Judith Straimer, Ph.D., Benoit Witkowski, Ph.D., David A. Fidock, Ph.D., Christophe Rogier, M.D., Ph.D., Pascal Ringwald, M.D., Frederic Arieu, M.D., Ph.D., and Odile Mercereau-Puijalon, Ph.D., for the K13 Artemisinin Resistance Multicenter Assessment (KARMA) Consortium.

From the Institut Pasteur in Cambodia, Malaria Molecular Epidemiology Unit (D.M., N.K., S. Kim, R.E., L.B., C.K., S.C., M. Ken, K. Loch, L. Canier, V.D., B.W.), and National Center for Parasitology, Entomology and Malaria Control (R.L.), Phnom Penh; Department of Parasites and Insect Vectors ( J.B., E.L., F.A., O.M.P.) and the Structural Microbiology Unit, Biology of Malaria Targets Group, Department of Structural Biology and Chemistry and CNRS, UMR3528 ( J.C.B.), Institut Pasteur, Hôpital Bichat Claude-Bernard, Centre National de Référence du Paludisme and PRES Sorbonne Paris Cité, Faculté des Sciences Pharmaceutiques et Biologiques (S. Houzé), Institut de Recherche pour le Développement, UMR 216 Mère et Enfant Face aux Infections Tropicales (S. Houzé, R.T.), Université Paris-Descartes, Sorbonne Paris Cité, and Laboratoire de Parasitologie-Mycologie, Hôpital Cochin, (F.A.), Paris, Aix Marseille Université, Unité de Recherche sur les Maladies Infectieuses et Tropicales Emergentes, and ( Centre National de Référence du Paludisme Marseille (B.P.), and Unité de Recherche sur les Maladies Infectieuses et Tropicales Emergentes (URMITE), UMR 6236 (C.R.), Marseille, Institut de Recherche Biomédicale des Armées, IRBA, Bretigny-sur-Orge, France (B.P., C.R.), Centre de Physiopathologie de Toulouse-Purpan (S.M.) and Centre Hospitalier Universitaire de Toulouse (A.B.), Toulouse, and Centre Hospitalier de Mayotte, Mayotte (L. Collet) — all in France; Centre de

Recherches Médicales de Lambaréné, Hôpital Albert Schweitzer, Lambaréné, Gabon (A.A.A., P.G.K., M. Ramharter); Institut für Tropenmedizin, Universität Tübingen, Tübingen, Germany (A.A.A., P.G.K., M. Ramharter); Leiden Medical University Center, Department of Parasitology, Albinusdreef, Leiden, the Netherlands (A.A.A.); Parasitology Research Group, International Center for Diarrhoeal Disease Research (M.S.A., W.A.K.), and Directorate General of Health Services (M.J.K.), Dhaka, Bangladesh; University of Ibadan, Ibadan, Nigeria (O.A.); Nangarhar University, Jalalabad, Afghanistan (G.R.A.); Mahidol-Oxford Research Unit, Mahidol University (G.R.A.), Center of Excellence in Pharmacology and Molecular Biology of Malaria and Cholangiocarcinoma, Chulabhorn International College of Medicine, Thammasat University (K.N.-B.), Mahidol Vivax Research Unit, Faculty of Tropical Medicine, Mahidol University (J.Sattabongkot), and World Health Organization (WHO), Country Office for Thailand (M.D.B.) Bangkok; Papua New Guinea Institute of Medical Research, Goroka, Papua New Guinea (C.B.); Department of Medical Biology, University of Melbourne (C.B.), and Walter and Eliza Hall Institute of Medical Research (C.B., A.A.F.), Melbourne, VIC, Australia; Epicentre Mbarara Research Center and Mbarara University of Science and Technology (Y.B.), Mbarara, Uganda; Public Health Research Center, Jiangnan University, and Jiangsu Institute of Parasitic Diseases, Wuxi (J. Cao), and National Institute of Parasitic Diseases, Chinese Center for Disease Control and Prevention, Key Laboratory of Parasite and Vector Biology of the Chinese Ministry of Health (J.H.C., M. Li, L.-H.T.), and Institut Pasteur of Shanghai, Chinese Academy of Sciences (L.J.), Shanghai — all in China; Department of Entomology, Pennsylvania State University, State College (L. Cui); Epidemiology and Disease Control Division, Ministry of Public Health, Kathmandu, Nepal (G.D.T.); Institut Pasteur de Dakar and Immunology Department, University Cheikh Anta DIOP de Dakar, Dakar, Senegal (A.D.); Institut Pasteur de Bangui, Bangui, Central African Republic (D.D.); Faculté des

Sciences de la Santé, Université de Lomé, Lomé, Togo (M.A.D.); Centre Pasteur du Cameroun, Pôle d'Excellence en Epidémiologie du Paludisme (C.E.E.M.), and Institut de Recherche pour le Développement (I.M.), Yaounde, and Faculty of Medicine and Pharmaceutical Sciences, Biological Sciences Unit, University of Douala, Douala (C.E.E.M.) — all in Cameroon; Research Institute for Tropical Medicine, Department of Health, Muntinlupa City, Philippines (F.E.C.J.E.); Centre International de Recherches Médicales de Franceville, Franceville, Gabon (T.F.); Fiocruz Fundação Oswaldo Cruz, Rio de Janeiro (M.F.F.C.), and Fundação de Medicina Tropical Dr. Heitor Vieira Dourado and Instituto de Pesquisas Leônidas & Maria Deane, Fiocruz Amazônia, Manaus (M. Lacerda) — all in Brazil; University of Gondar, School of Biomedical and Laboratory Sciences, College of Medicine and Health Sciences, Gondar, Ethiopia (A.A.F.); University of Veterinary Medicine, Institute of Parasitology, Department of Pathobiology (H.-P.F.), Malaria Research Initiative Bandarban (H.N.), and Specific Prophylaxis and Tropical Medicine (H.N.) and the Department of Medicine I, Division of Infectious Diseases and Tropical Medicine (M. Ramharter), Medical University of Vienna — all in Vienna; World Health Organization, Country Office for Somalia (A.M.H.), and the Ministry of Health and Human Service (A.S.O.), Mogadishu, Somalia; Caucaseco Scientific Research Center, Cali, Colombia (S. Herrera); Center of Malariology, Parasitology and Entomology (B.H., M. Khanthavong), Institut Pasteur du Laos (S. Kano), and SATREPS Project for Parasitic Diseases (S. Kano), Vientiane, Laos; Henry M. Jackson Foundation for the Advancement of Military Medicine, Bethesda, MD (M. Leelawong); U.S. Naval Medical Research Unit 6, Lima (M. Leelawong); Parasitology Research Division, Department of Medical Research (Upper Myanmar), Pyin Oo Lwin, Myanmar (K. Lin); Centre de Recherche Médicale et Sanitaire, Niamey, Niger (I.M.L.); Rwanda BioMedical Center, Kigali, Rwanda (J.B.M.); University of Kinshasa, Kinshasa, Democratic Republic of Congo

(H.M.M., P.T.T.); University of Antwerp, Antwerp, Belgium (H.M.M.); Institut Pasteur de la Guyane, Laboratoire de Parasitologie, WHO Collaborative Center for Surveillance of Antimalarial Drug Resistance, Cayenne, French Guiana (L.M., E.L.); Tropical Diseases Research Center, Clinical Sciences, Ndola, Zambia (M.N.); University of Sciences, Techniques and Technologies of Bamako, Malaria Research and Training Center, Bamako, Mali (K.N.); Centra Muraz and Institut de Recherche en Sciences de la Santé, Direction Régionale de l'Ouest, Bobo-Dioulasso ( J.B.O.), and Groupe de Recherche Action en Santé, Ouagadougou (S.B.S.) — both in Burkina Faso; Medicines for Malaria Venture (D.R.P.) and Global Malaria Programme, WHO (M.W., P.R.), Geneva; University of Calgary, Calgary, AB, Canada (D.R.P.); National Institute of Malariology, Parasitology and Entomology, Hanoi (B.Q.P.); Institut Pasteur de Madagascar, Antananarivo, Madagascar (M. Randrianarivojosia., I.V.-W., C.R.); Centre Suisse de Recherches Scientifiques en Côte d'Ivoire (K.D.S.), Université Félix Houphouët-Boigny, UFR Biosciences (K.D.S.), and Institut Pasteur de Côte d'Ivoire (O.A.T.), Abidjan; London School of Hygiene and Tropical Medicine, Malaria Reference Laboratory, Faculty of Infectious and Tropical Diseases, London (C.S.); Department of Parasitology, Hasanuddin University, Jalan Perintis Kemerdekaan, Makassar, and Eijkman Institute for Molecular Biology, Jalan Diponegoro, Jakarta — both in Indonesia (D.S.); National Vector Borne Disease Control Program, Ministry of Health and Medical Services, Solomon Islands (L.W.); Malaria and Vector Research Group, Biotechnology Research Center, Pasteur Institute of Iran, Tehran, Iran (S.Z.); Research Institute, National Center for Global Health and Medicine, Toyama, Shinjuku, Tokyo (S. Kano); and the Department of Microbiology and Immunology (B.S., J.S., D.A.F.) and Division of Infectious Diseases, Department of Medicine (D.A.F.), Columbia University Medical Center, New York.



### **Contributors' full names, academic degrees and affiliations.**

Mahamadou Aboubacar, B.S., June Haidee L. Acuña, B.Sc., Voahangy Andrianaranjaka, Ph.D., Myriam Arévalo-Herrera, Ph.D., Ako Ako Berenger Aristide, Ph.D., Puji B.S. Asih Ph.D., Albino Bobogare, M.Sc., Paul T. Brey, Ph.D., Wanna Chaijaroenkul, Ph.D., Shen-Bo Chen, M.Sc., Justine Chileshe, M.Sc., Pornpimol Chobson, M.Sc., Sandrine Cojean, Ph.D., Baba Coulibaly, M.Sc., Philippe Deloron, M.D., Ph.D., Xavier Charles Ding, Ph.D., Navid Dinparast Djadid, Ph.D., Gora Diop, Ph.D., Abdoulaye Djimdé, Pharm.D., Ph.D., Ogobara K. Doumbo, M.D., Ph.D., Salomon Durand, M.D., Bacayé Fall, M.D., Yanting Fan, M.Sc., Filomeno Fortes, Ph.D., Gisela Henriques, Ph.D., Yabo Josiane Honkpehedji, M.D., Véronique Hubert, M. Sc., Raquel Inocêncio da Luz, Ph.D., Moritoshi Iwagami, Ph.D., Sarah Javati, M.Sc., Corine Karema, M.D., M.Sc., Andrea Kuehn, Ph.D., Mahaman Moustapha Lamine, M.Sc., Andres G. Lescano, Ph.D., M.H.S., Jean-François Lepère, M.D., Felix Lötsch, M.D., Feng Lu, Ph.D., Jennifer S. Luchavez, M.S.P.H., Pascal Lutumba, Ph.D., Marylin Madamet, Ph.D., Phidelis Malunga, B.S., Sarah Emmanuelle Mara, M.H.S., Sylvia S. Marantina, M.Sc., Abu Nasser Mohon, M.Sc., Wuelton Monteiro, Ph.D., Ivo Mueller, Ph.D., Poonuch Muhamud, Ph.D., Juliet Mwanga-Amumpaire, M.D., Wang Nguitragool, Ph.D., Debbie Nolder, Ph.D., Sandrine Nsango, Ph.D., Dan Nyehangane, M.Sc., Subulade Olaniyan, Ph.D., Alphonse Ouedraogo, MD., Ph.D., Patrice Piola, M.D., Ph.D., Sakineh Pirahmadi, M.Sc., Ahmad Raeisi, D.V.M., Ph.D., Larissa Rodrigues Gomes, M.Sc., Rahamatou Silai, B.Sc., Fabrice A. Some, Ph.D., Issaika Soulama, PharmD, MSc., Ph.D., Gaëtan Texier, M.D., Alassane Thiam, M.H.S., Lincoln Timinao, M.Sc., Noella Umulisa, M.D., M.Sc., Andres F. Vallejo, Ph.D., Jean-Pierre Van geertruyden, Ph.D., Zenglei Wang, Ph.D., Issaka Zongo, M.D., Ph.D.

From Aix Marseille Université, Unité de Recherche sur les Maladies Infectieuses et Tropicales Emergentes, UM 63, CNRS 7278, IRD 198, Inserm 1095, Marseille, France (M.M.); Animal Biology Department, University Cheikh Anta Diop de Dakar, Dakar, Senegal (G.D.); APHP, Hôpital Bichat Claude-Bernard, Centre National de Référence du Paludisme, Paris, France (S.C., V.H.); Barcelona Centre for International Health Research (CRESIB, Hospital Clínic-Universitat de Barcelona), Barcelona, Spain (I.M.); Caucaseco Scientific Research Center, Cali, Colombia (M.A.H., A.F.V.); Center of Excellence in Pharmacology and Molecular Biology of Malaria and Cholangiocarcinoma, Thammasat University, Bangkok, Thailand (W.C.); Centre de Recherche Médicale et Sanitaire, Niamey, Niger (M.A., M.M.L.); Centre de Recherches Médicales de Lambaréné, Hôpital Albert Schweitzer, Lambaréné, Gabon (Y.J.H., F.Lo.); Centre d'Epidémiologie et de Santé Publique des Armées, Marseille, France (G.T.); Centre Hospitalier de Mayotte, Mayotte, France (J.F.L.); Centre National de Recherche et de Formation sur le Paludisme, Ouagadougou, Burkina Faso (A.O., I.S.); Centre national de référence du paludisme, Marseille, France (M.M.); Centre Pasteur du Cameroun, Pôle d'Excellence en Epidémiologie du Paludisme, Yaounde, Cameroon (G.T.); Centre Suisse de Recherches Scientifiques en Côte d'Ivoire, Abidjan, Cote d'Ivoire (X.C.D.); Centre Suisse de Recherches Scientifiques en Côte d'Ivoire, Abidjan, Cote d'Ivoire (S.E.M.); Department of Entomology, Pennsylvania State University, Pennsylvania, USA (Z.W.); Department of Medical Biology, University of Melbourne, Melbourne, Australia (I.M.); Department of Parasitology, US Naval Medical Research Unit No. 6 (NAMRU-6), Peru (A.G.L., S.D.); Eijkman Institute for Molecular Biology, Jakarta, Indonesia (S.S.M., P.B.S.A.); Epicentre Mbarara Research Centre, Mbarara, Uganda (J.M.A., D.Ny.); Facultad de Salud Pública y Administración, Universidad Peruana Cayetano Heredia, Peru (A.G.L.); Faculté de Pharmacie, Université Paris Sud, Chatenay Malabry, France (S.C.); Faculty of Medicine and

Pharmaceutical Sciences, Biological Sciences Unit, University of Douala, Doual, Cameroon (S.N.); Fiocruz Fundação Oswaldo Cruz, Rio de Janeiro, Brazil (L.R.G.); Fundação de Medicina Tropical Dr. Heitor Vieira Dourado (FMT-HVD), Manaus, Brazil (A.K., W.M.); Institut de Recherche Biomédicale des Armées, Equipe Résidente de Recherche en Infectiologie Tropicale, Marseille, France (M.M.); Institut de Recherche en Sciences de la Santé, Direction Regionale de l'Ouest, Bobo-Dioulasso, Burkina Faso (F.S.A., I.Z.); Institut de Recherche pour le Développement, UMR 216 Mère et Enfant Face aux Infections Tropicales, Université Paris-Descartes, Paris, France (P.D.); Institut de Recherche pour le Développement, Yaounde, Cameroon (S.N.); Institut Pasteur de Côte d'Ivoire, Abidjan, Cote d'Ivoire (A.A.B.A., B.C.); Institut Pasteur de Dakar, Dakar, Senegal (G.D., A.T.); Hôpital Principal de Dakar, Dakar, Senegal (B.F.); Institut Pasteur de Madagascar, Antananarivo, Madagascar (V.A., P.P.); Institut Pasteur du Laos, Vientiane, Lao PDR (P.T.B., M.I.); Institut Pasteur of Shanghai, Chinese Academy of sciences, Shanghai, China (Y.F.); Institute of Child Health, University of Ibadan, Ibadan, Nigeria (S.O.); Instituto Nacional de Saude Publica, Ministerio da Saude, Luanda, Angola (F.F.); Jiangsu Institute of Parasitic Diseases, Wuxi, China (F.Lu.); London School of Hygiene and Tropical Medicine, Reader in Parasitology, Malaria Reference Laboratory, Faculty of Infectious & Tropical Diseases, London , UK (G.H., D.No.); Mahidol Vivax Research Unit, Bangkok, Thailand (W.N., P.C.); Malaria and Vector Research Group (MVRG), Biotechnology Research Center (BRC), Pasteur Institute of Iran, Tehran, Iran (N.D.D., S.P.); Medicines for Malaria Venture, Geneva, Switzerland (X.C.D.); National Institute of Parasitic Diseases, Chinese Center for Disease Control and Prevention, Key Laboratory of Parasite and Vector Biology of the Chinese Ministry of Health, Shanghai, China (S.B.C.); National Programme Manager for Malaria Control, Ministry of Health and Medical Education, Tehran, Iran (A.R.); National Vector Borne Disease Control Program, Ministry of Health and Medical

Services, Solomon Islands (A.Bo.); Papua New Guinea Institute of Medical Research, Goroka, Papua New Guinea (S.J., L.T.); Programme National de Lutte contre le Paludisme, Moroni, Union des Comores (R.S.); Research Institute for Tropical Medicine, Department of Health, Muntinlupa City, Philippines (J.H.L.A., J.S.L.); Research Institute, National Center for Global Health and Medicine, Toyama, Shinjuku, Tokyo, Japan (M.I.); Rwanda BioMedical Center, Kigali, Rwanda (C.Ka., N.U.); SATREPS project for Parasitic Diseases, Vientiane, Lao PDR (P.T.B., M.I.); Swiss Tropical and Public Health Institute, University of Basel, Basel, Switzerland (C.Ka.); Thammasat University, Chulabhorn International College of Medicine, Bangkok, Thailand (W.C., P.Mu.); Tropical Diseases Research Center, Clinical Sciences, Ndola, Zambia (J.Ch., P.Ma.); University of Antwerp, Antwerp, Belgium, (R.I.L., J.P.V.G.); University of Calgary, Calgary, Canada (A.N.M.); University of Kinshasa, Kinshasa, Congo Democratic Republic (P.L.); University of Sciences, Techniques and Technologies of Bamako, Malaria Research and Training Center, Bamako, Mali (A.Dj., O.K.D.); Walter and Eliza Hall Institute of Medical Research, Melbourne, Australia (I.M.).

## **Geospatial mapping methodology.**

Vectorial maps were downloaded from world map using the raster package (<http://cran.r-project.org/web/packages/raster/>) from the open access DIVA-GIS system (<http://www.diva-gis.org>).<sup>1</sup> R packages sp (R package for Spatial Data - <http://cran.r-project.org/web/packages/sp/index.html>) and rgeos (R package for Geometry Engine Open Source - <http://cran.r-project.org/web/packages/rgeos/index.html>) were used for dealing with spatial data. The geographic distribution of malaria endemicity areas was downloaded from malaria map ([http://www.map.ox.ac.uk/browse-resources/endemicity/Pf\\_mean/](http://www.map.ox.ac.uk/browse-resources/endemicity/Pf_mean/)). The proportion of wild type K13 in each country was calculated (details in Table S5) and only sites where >5 samples were collected were included in the mapping. Data were interpolated using two different approaches and the map censored for regions with very low to nil reported malaria prevalence. To generate the Asia map (Figure 2A), we used the well-established spatial statistical interpolation of ordinary kriging<sup>2</sup> using a 50 km radius for the area surrounding the coordinate sampling site(s). To generate the world map (Figure 2B), we used an inverse distance weighted interpolation method with the Gstat package,<sup>3</sup> where the inverse distance weighting power was arbitrarily set to 5. A 100 km radius surrounding the coordinate sampling site(s) was used.

1. Hijmans RJ, Guarino L, Cruz M, Rojas E. Computer tools for spatial analysis of plant genetic resources data: 1. DIVA-GIS. *Plant Genetic Resources* 2001; Newsletter: 15-9.
2. Matheron G. Principles of geostatistics. *Econ Geol* 1963; 58: 1246–66.
3. Pebesma EJ. Multivariable geostatistics in S: the gstat package. *Computers & Geosciences* 2004; 30:683-91

**Figure S1.** Options proposed to partners involved in the KARMA study: reagents, samples and data flow chart, KARMA study 2014.

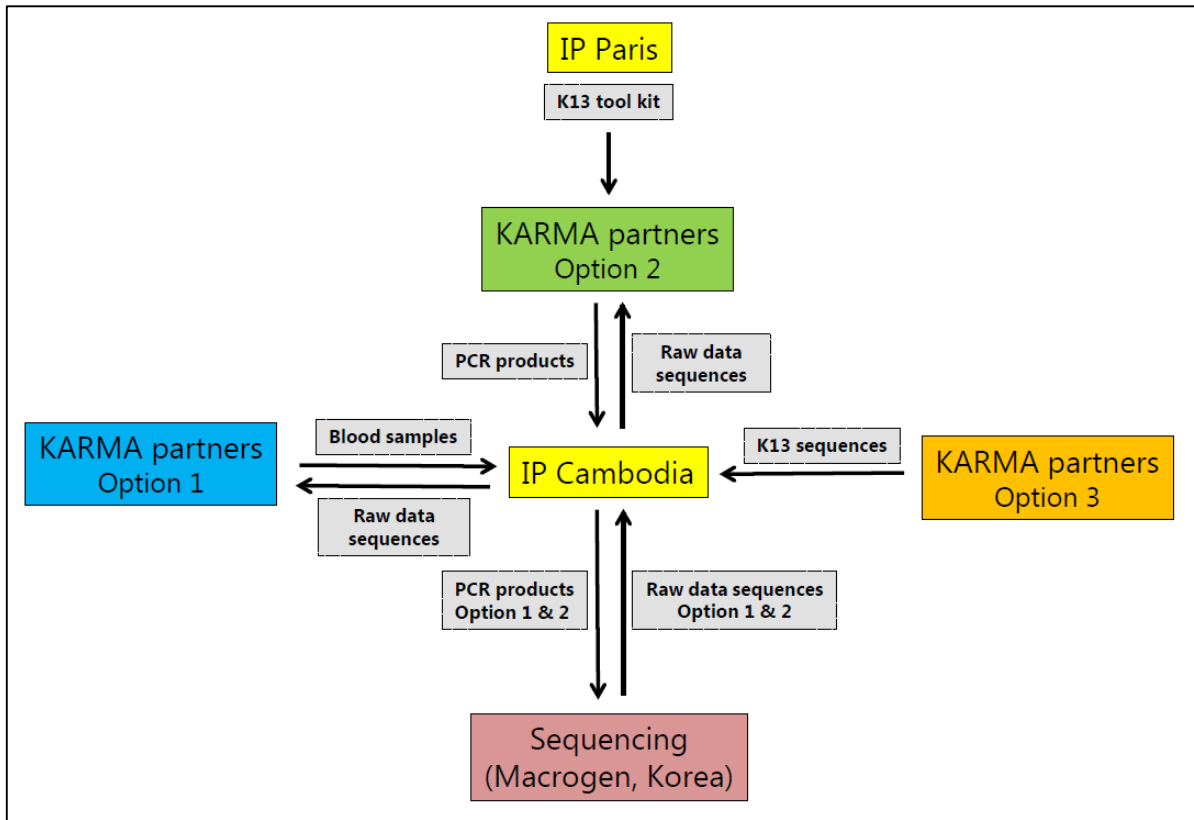

For details see Tables S3 and S4.

**Figure S2.** Detailed information regarding the sequencing pipeline and the quality control assessment conducted at IP Cambodia, KARMA study 2014

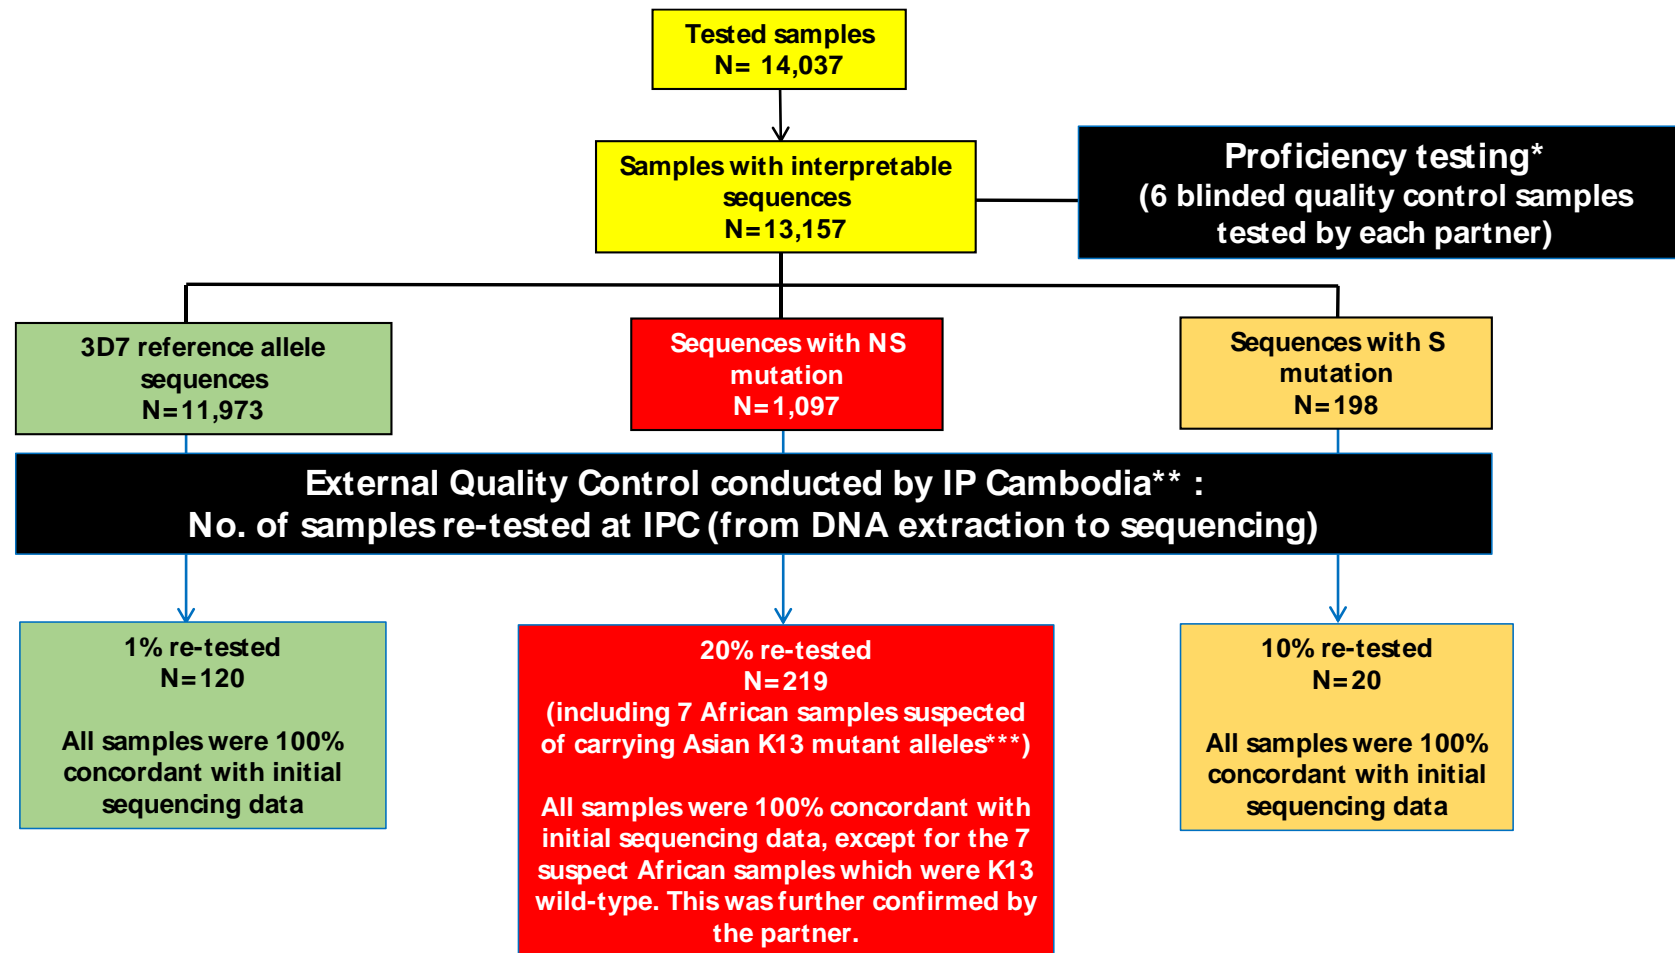

\* For the proficiency testing, among the 162 96-well plates used for PCR/sequencing the 14037 samples, only 6 plates gave discordant results with respect to the expected results of the 6 blinded quality control samples. All samples contained in these 6 plates were re-tested (from DNA extraction to sequencing) and validated by the second testing, as all 6 blinded quality control samples were found 100% concordant with their respective sequence.

\*\* For the external quality control, 359 samples were re-tested: 1% of the K13 wild-type isolates (n=120), 10% of the samples with synonymous mutations (n=20) and 20% of the samples with non-synonymous mutations (n=219). The latter batch included in particular all 7 African samples suspected of carrying an Asian K13 mutant allele. Results from the re-testing at IP-Cambodia showed that 352/359 samples were 100% concordant with the initial testing, except for the 7 suspect African samples, which were all 7 unambiguously found K13 wild-type. For these 7 cases, we strongly suspected a lab contamination from the blinded quality control samples sent to each partner. We asked the partner to re-test all samples from the 96-well plate containing the suspect case. The partner confirmed the presence of a K13 wild type in the suspected mutant sample, and all other samples were 100% concordant with the initial sequencing results. Therefore these 7 samples were classified wild-type.

\*\*\* Angola (R539T and I543T), Comoros (R539T), Burkina Faso (I543T and I543T), Niger (C580Y) and Zambia (C580Y).



**Figure S3.** Location of sampling sites and sample sizes, KARMA study 2014

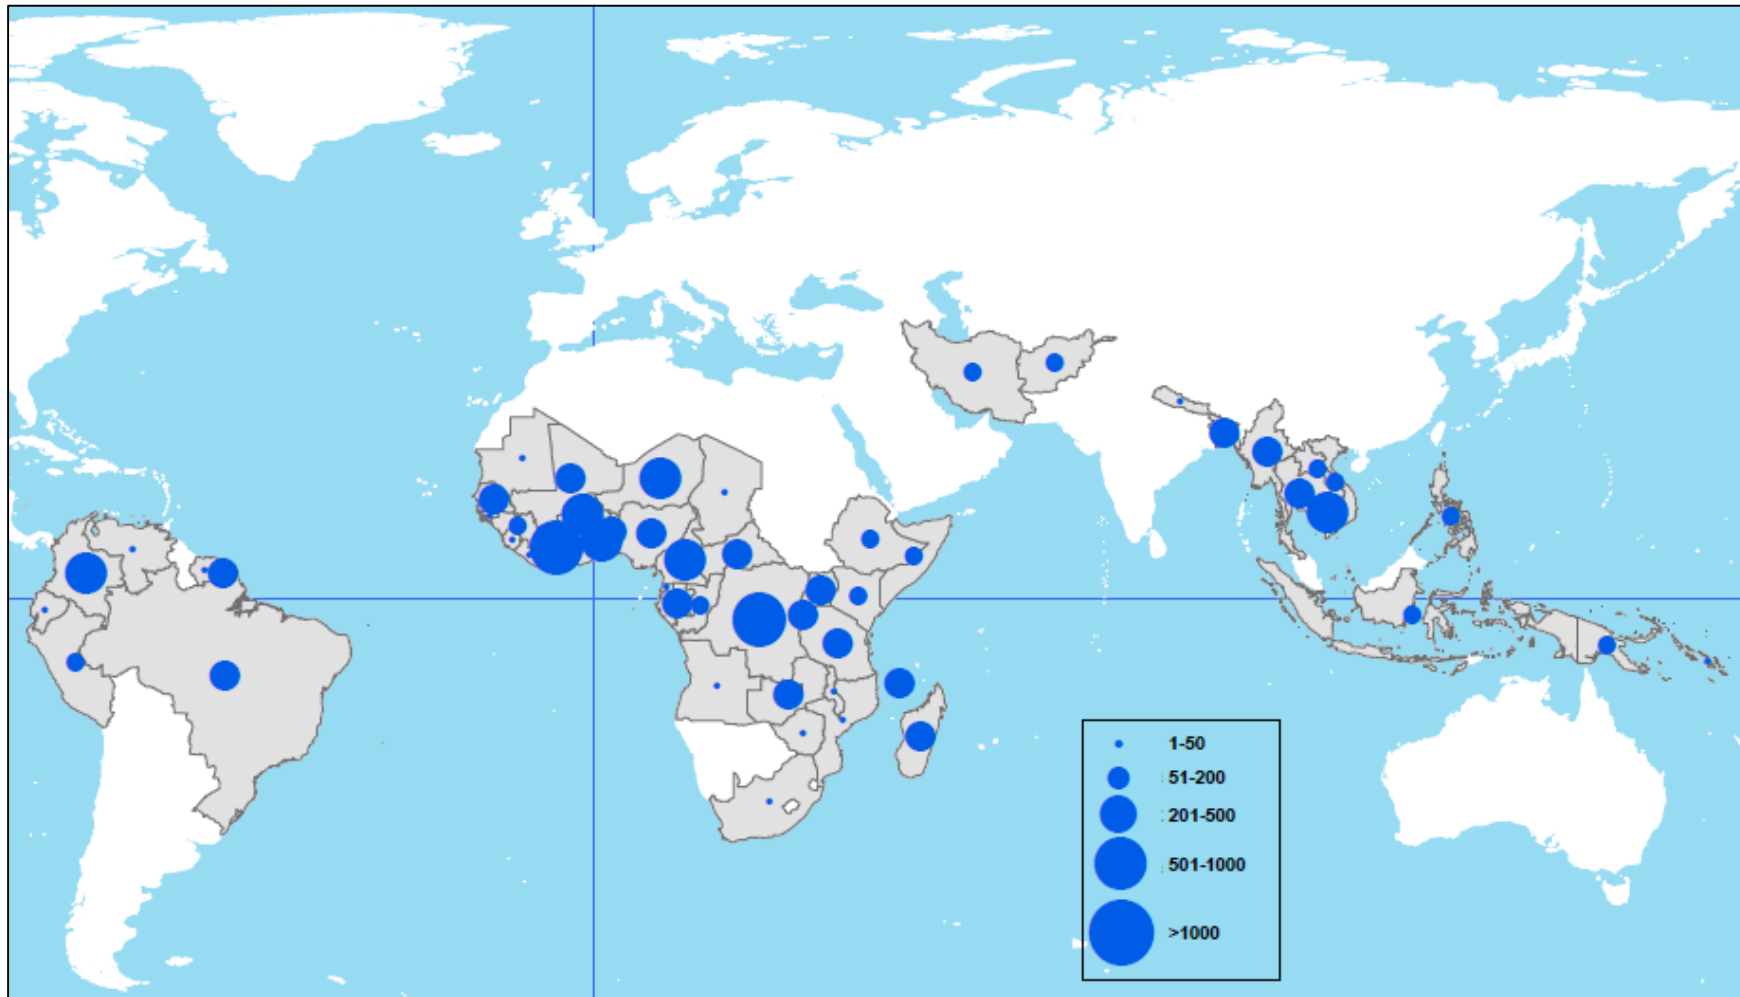

Blue circles show numbers of isolates in each country. For details see Table S3.

**Figure S4.** Assessment of the detection of minority alleles in artificially mixed DNA samples, containing various proportions of K13 wild-type and C580Y or R539T alleles, KARMA study 2014

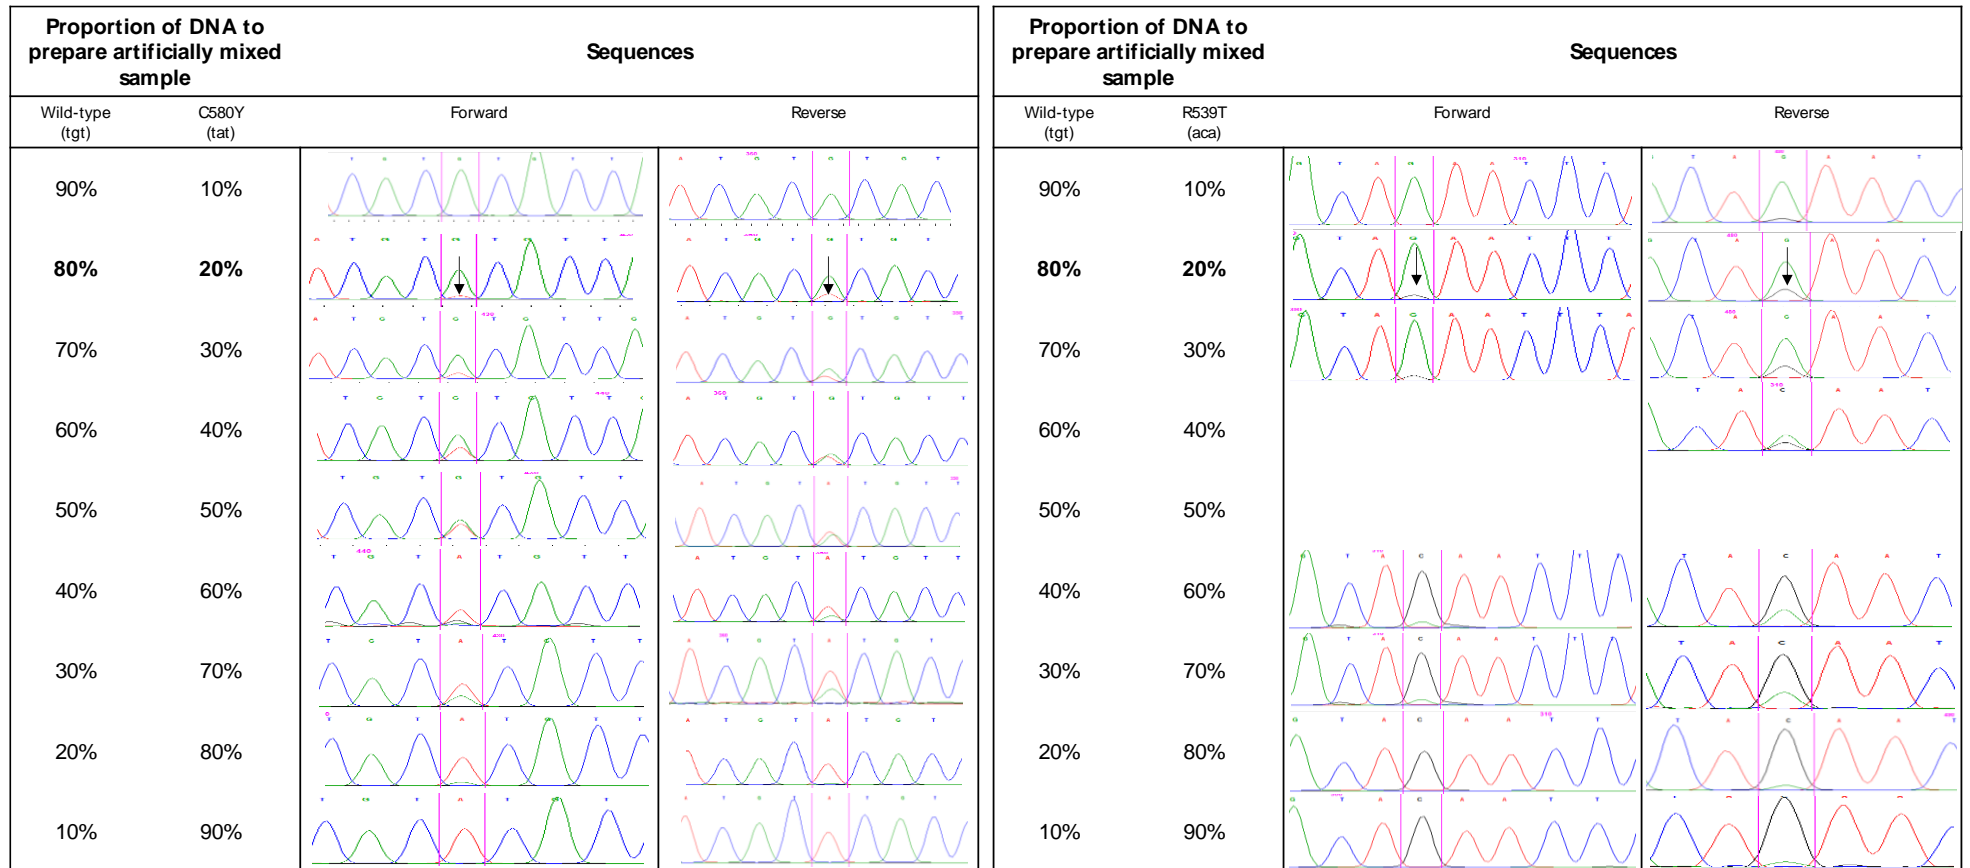

**Figure S5.** Flow chart describing the number of tested samples, the number of interpretable sequences, the number of 3D7-reference and mutant alleles sequences and the number of sequences with non-synonymous (NS) or synonymous (S) mutations observed in the KARMA study 2014.

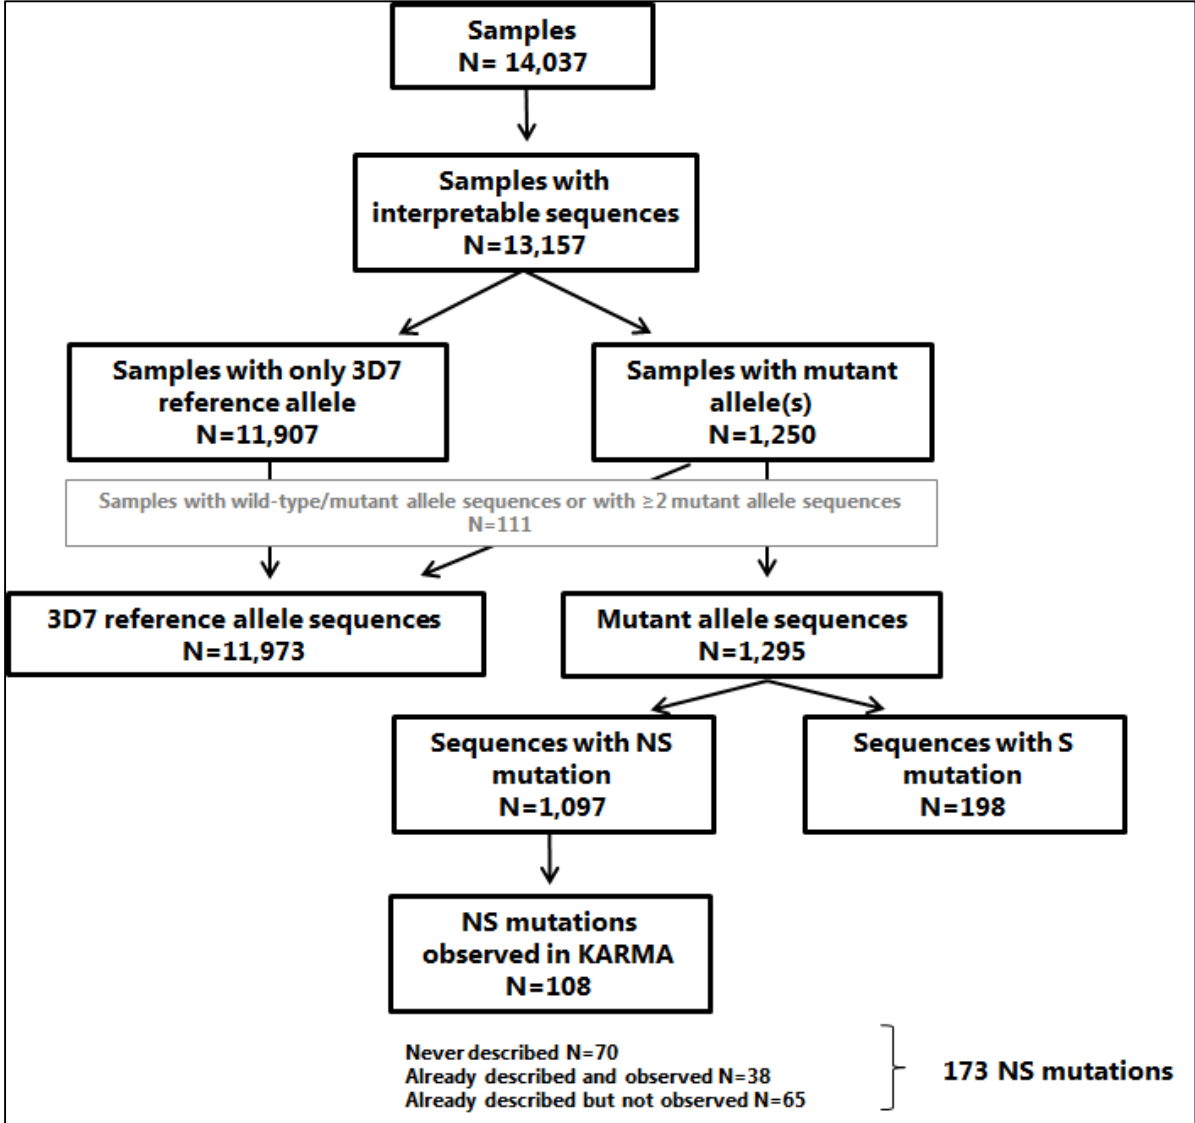

**Figure S6.** Worldwide distribution of haplotype diversity in the KARMA sampling sites, KARMA study 2014

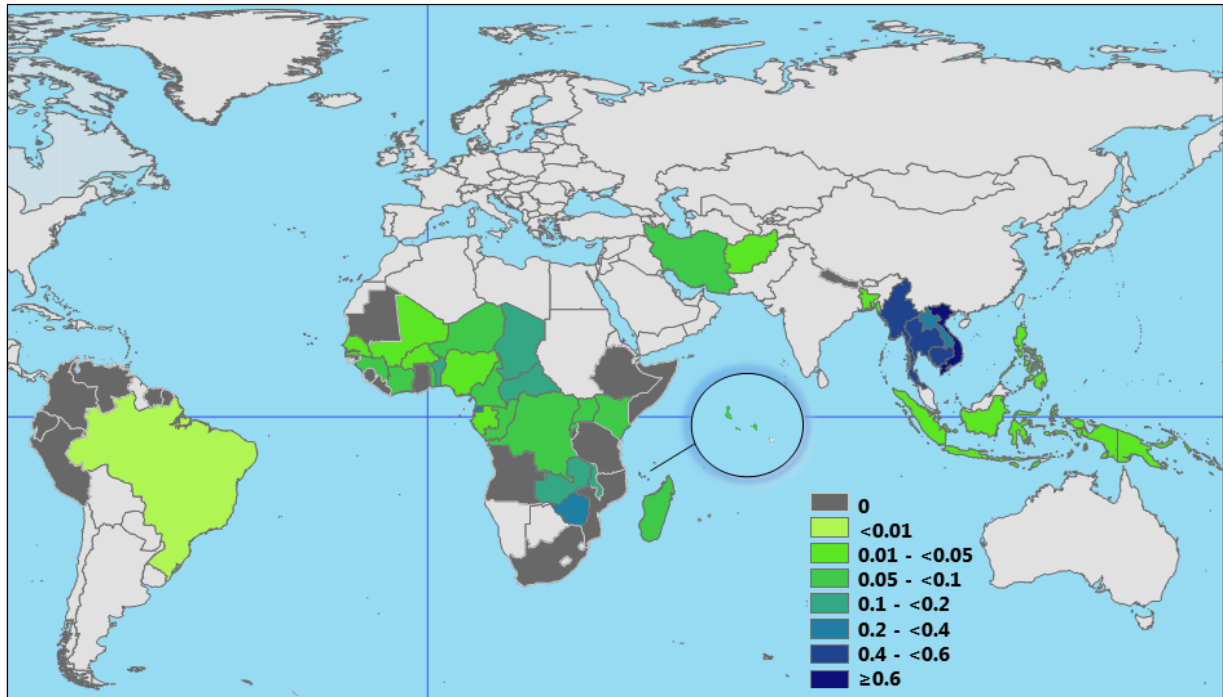

Details are provided in Table S5. Haplotype diversity ( $H_d$ ) was calculated using DnaSP (Nei 1987).

**Figure S7.** Geographic distribution of K13-propeller alleles in Cambodia in 2011–2012 and in 2013–2014, respectively, KARMA study 2014.

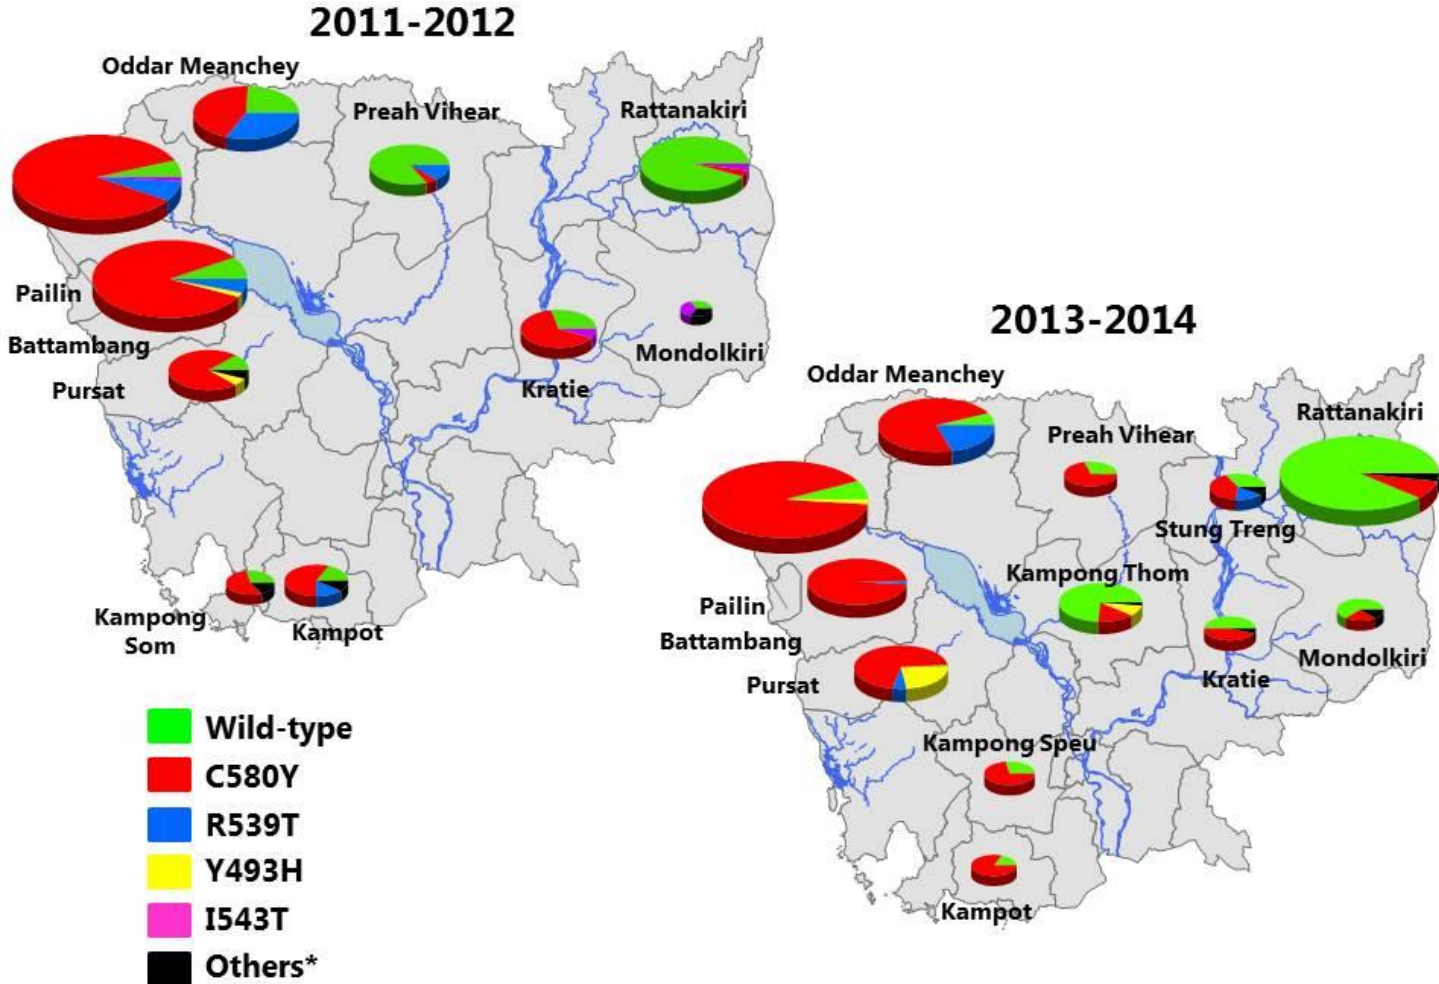

\* N458Y, C469F, S485N, A486V, P553L, V568G, D584V, E556D, I646L, N664S

Pie charts of K13-propeller allele frequency among 300 parasite isolates collected in ten Cambodian provinces in 2011-2012 <sup>1</sup> and 642 isolates collected in twelve provinces in 2013-2014 (KARMA study 2014). Pie sizes are proportional to the number of isolates and the different alleles are color-coded as indicated.

The frequencies of mutant K13-propeller alleles are as follows: West Cambodia: Pailin (2011-2012: 95%, n=84 vs. 2013-2014: 94%, n=164, P=0.97), Battambang (2011-2012: 93%, n=71 vs. 2013-2014: 100%, n=81, P=0.04), Pursat (2011-2012: 89%, n=19 vs. 2013-2014: 98%, n=52, P=0.32); Southwest Cambodia: Kampot (2011-2012: 83%, n=12 vs. 2013-2014: 83%, n=12, P=0.58), Kampong Som (2011-2012: 71%, n=74), Kampong Speu (2013-2014: 71%, n=15); Central Cambodia: Kampong Thom (2013-2014: 26%, n=42); Northwest Cambodia: Oddar Meanchey (2011-2012: 76%, n=33 vs. 2013-2014: 95%, n=81, P=0.008), Preah Vihear (2011-2012: 16%, n=19 vs. 2013-2014: 70%, n=17, P=0.003); East Cambodia: Kratie (2011-2012: 71%, n=17 vs. 2013-2014: 50%, n=16, P=0.38), Mondulkiri (2011-2012: 67%, n=3 vs. 2013-2014: 39%, n=13, P=0.81), Stung Treng (2013-2014: 65%, n=19), Ratanakiri (2011-2012: 6%, n=35 vs. 2013-2014: 11%, n=152, P=0.56).

<sup>1</sup> Ariey F, Witkowski B, Amaratunga C, et al. A molecular marker of artemisinin-resistant *Plasmodium falciparum* malaria. *Nature* 2014; 505:50-5.

**Figure S8.** Frequency distribution of the most prevalent NS-mutations in Cambodia-Vietnam-Lao PDR and Thailand-Myanmar-China areas, KARMA study 2014.

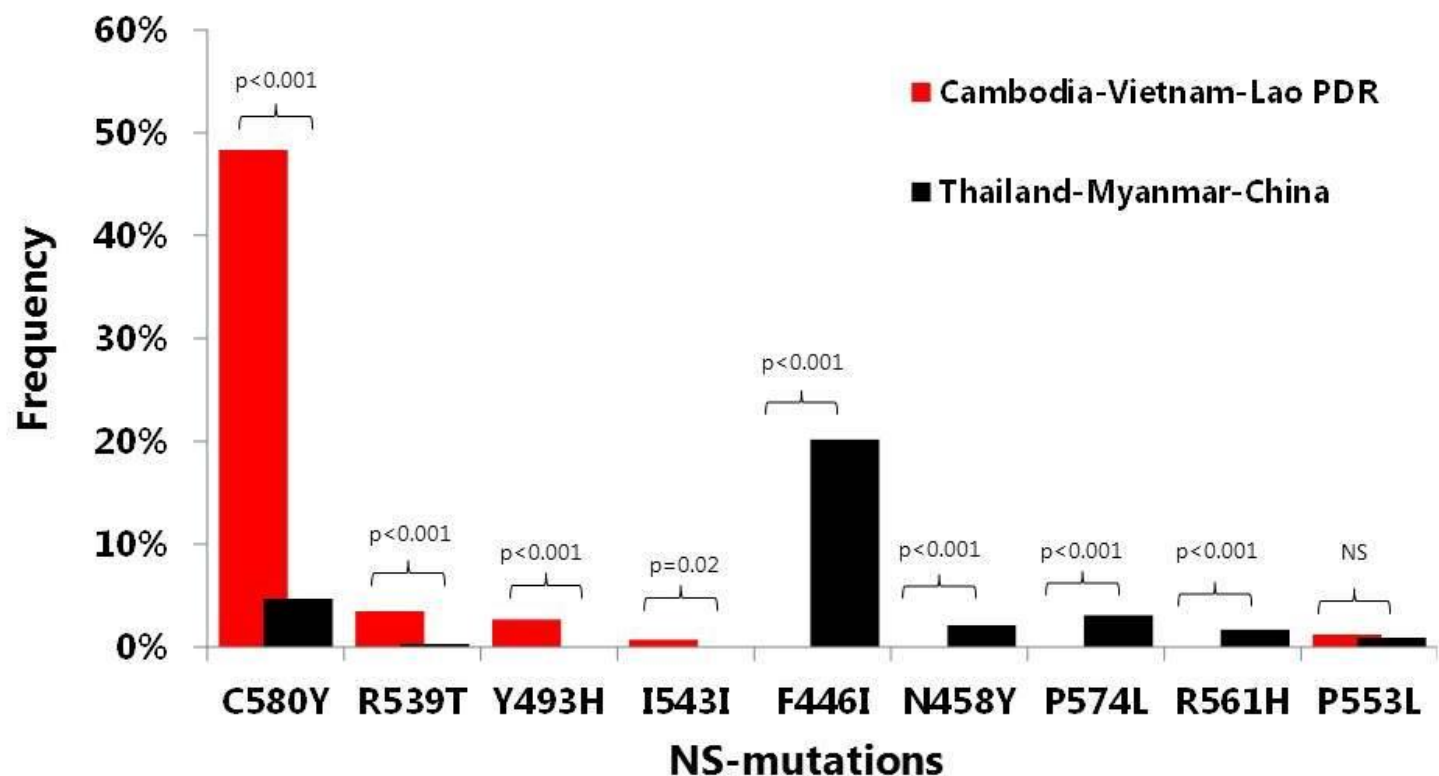

C580Y: 48.3% Cambodia-Vietnam-Lao PDR vs. 4.7% Thailand-Myanmar-China; R539T: 3.5% Cambodia-Vietnam-Lao PDR vs. 0.3% Thailand-Myanmar-China; Y493H: 2.7% Cambodia-Vietnam-Lao PDR vs. 0% Thailand-Myanmar-China; I543I: 0.7% Cambodia-Vietnam-Lao PDR vs. 0% Thailand-Myanmar-China; F446I: 0% Cambodia-Vietnam-Lao PDR vs. 20.2% Thailand-Myanmar-China; N458Y: 0% Cambodia-Vietnam-Lao PDR vs. 2.1% Thailand-Myanmar-China; P574L: 0% Cambodia-Vietnam-Lao PDR vs. 3.1% Thailand-Myanmar-China; R561H: 0% Cambodia-Vietnam-Lao PDR vs. 1.7% Thailand-Myanmar-China; P553L: 1.2% Cambodia-Vietnam-Lao PDR vs. 0.9% Thailand-Myanmar-China (NS= not significant).

**Figure S9.** Regional distribution of the three-loci haplotypes of (A) the C580Y NS-mutant alleles in Cambodia, Lao PDR and Vietnam, (B) the F446I NS-mutant alleles in Myanmar and China, (C) the Y493H, R539T and I543T NS-mutant alleles in Cambodia and Vietnam and (D) the P553L, P574L, E605K, N458Y, R561H NS-mutant alleles in Cambodia, Vietnam, Thailand, Myanmar and China, KARMA study 2014.

**A. C580Y haplotype distribution.**

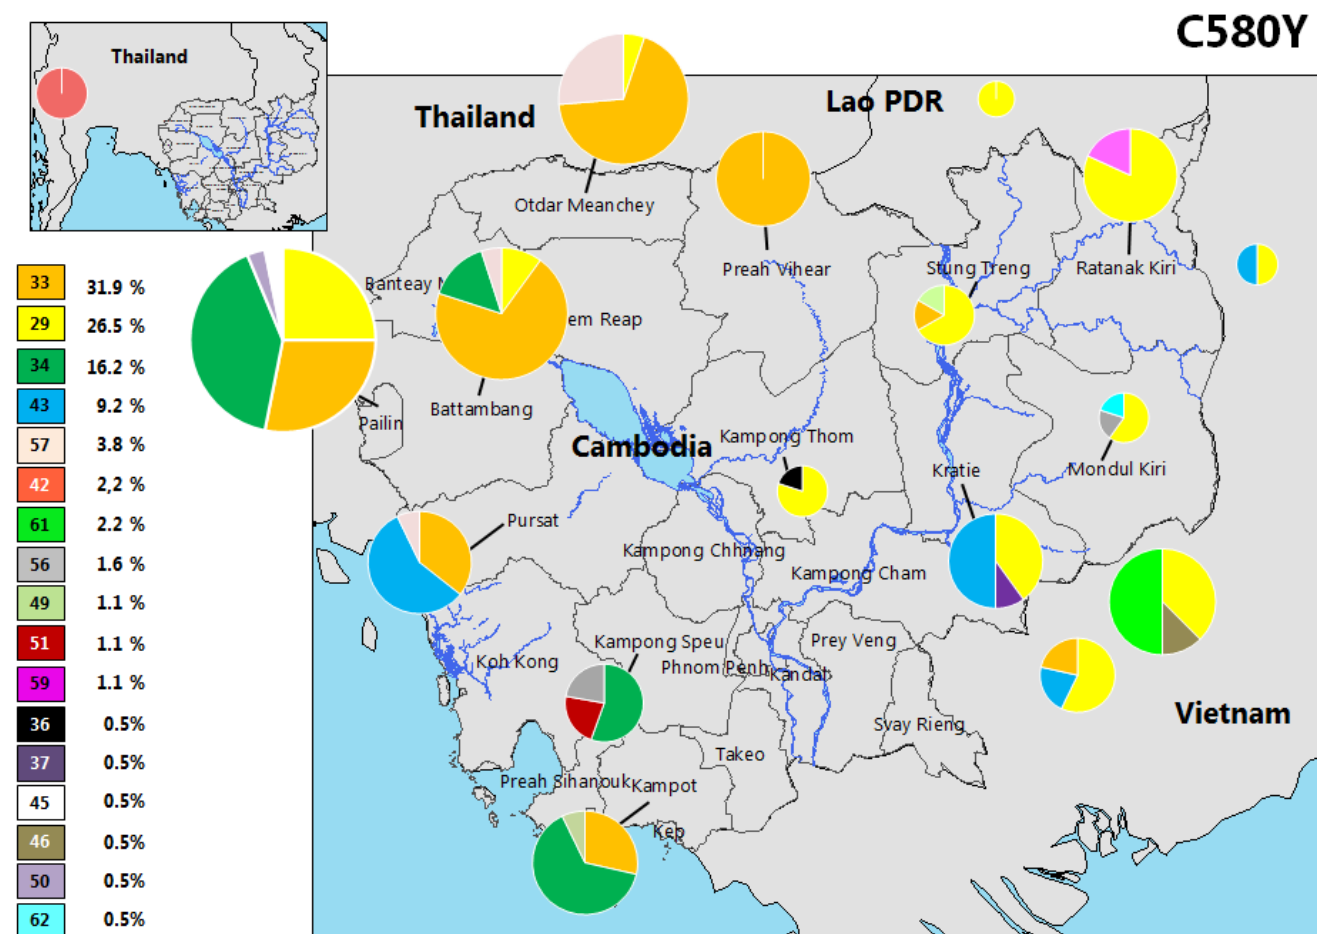

Colored-pies represent the proportion of C580Y-haplotypes observed by site. Numbers inside the colored-squares (left side) refer to the flanking haplotype ID (for haplotype numbering see Table S9) and the percentage indicated refers to the relative frequency of each C580Y haplotype. 182, 24, 2 and 4 isolates were studied from Cambodia, Vietnam, Lao PDR and Thailand, respectively. Details are provided in Table S9.



## B. F446I haplotype distribution

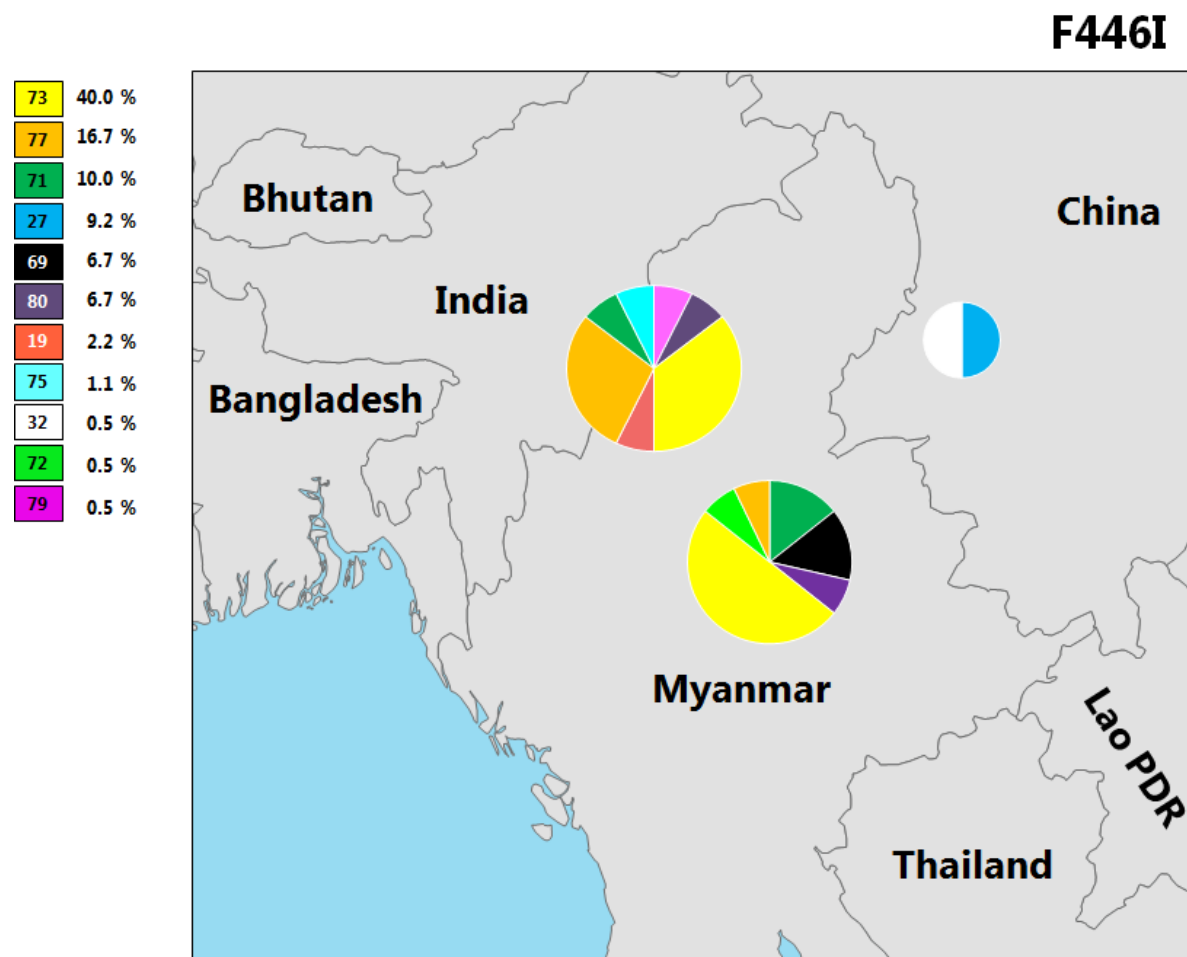

Colored-pies represent the proportion of F446-haplotypes observed by site. Numbers inside the colored-squares refer to the flanking haplotype ID (for haplotype numbering see Table S9) and percentages indicate the relative frequency of each F446I haplotype. 28 and 2 isolates were studied from Myanmar and China PR, respectively. Details are provided in Table S9.



# R539T

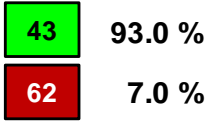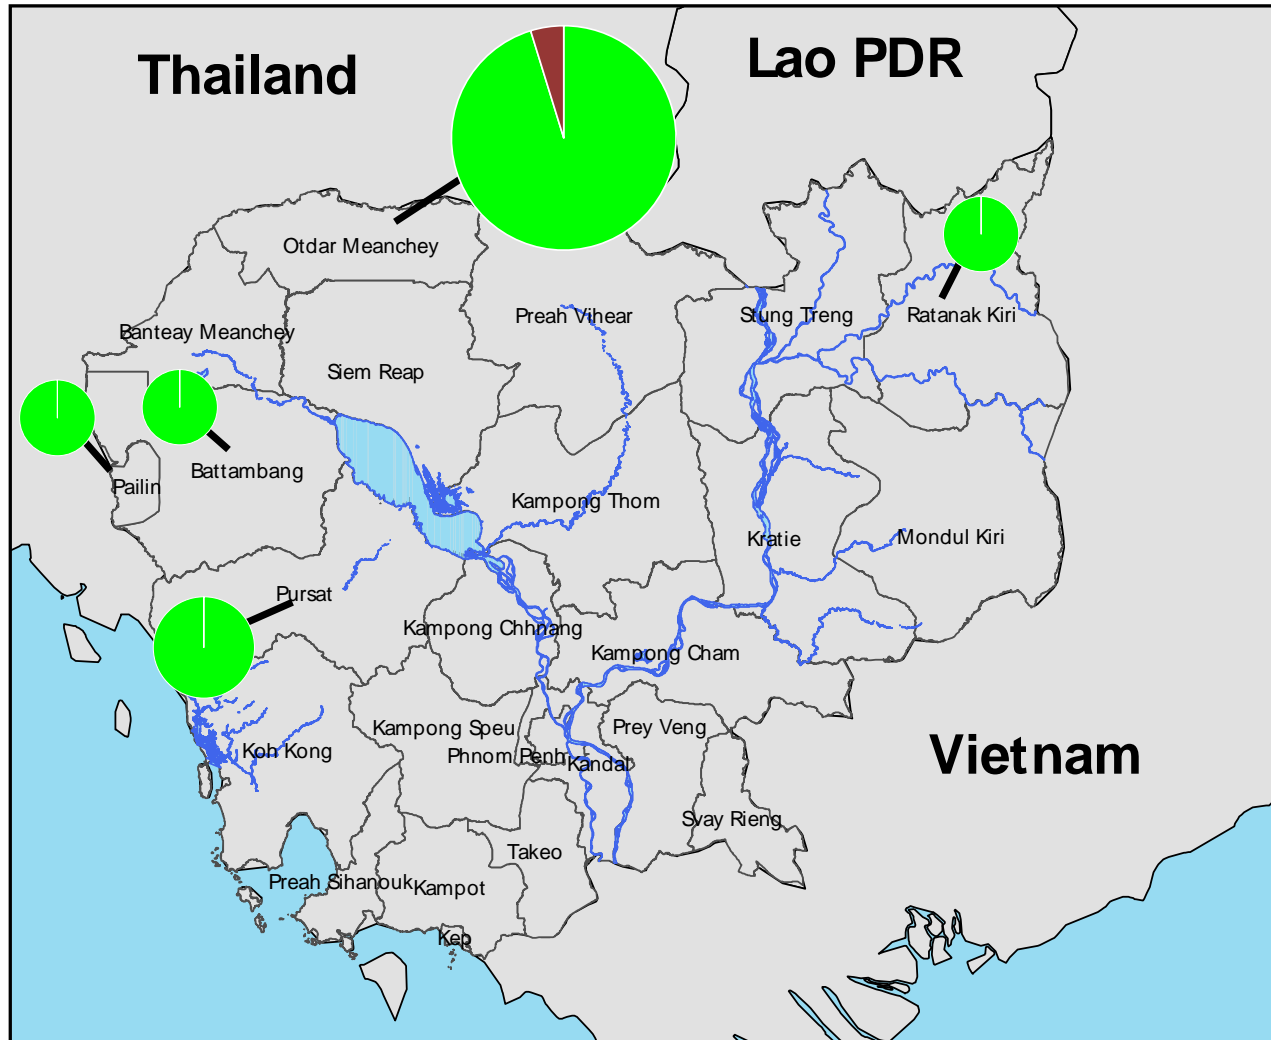

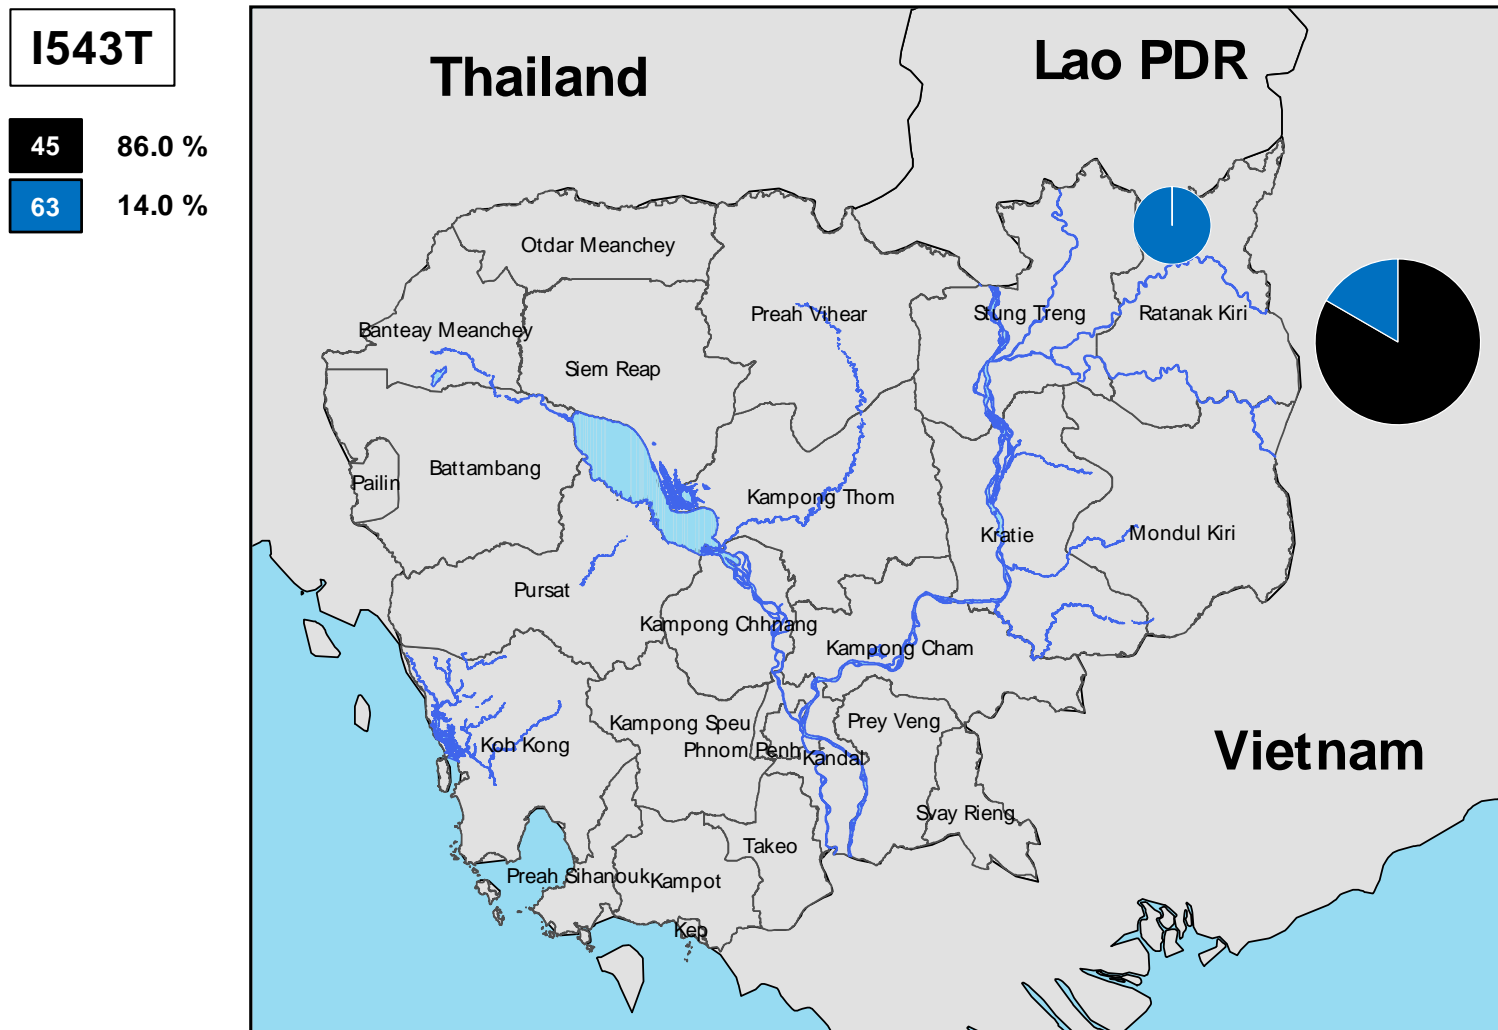

Colored-pies represent the proportion of Y493H-, R539T- and I543T-haplotypes observed by site. Numbers refer (left side) to the flanking haplotype ID (see Table S9) and percentages indicate the relative frequency of each three-loci haplotype in the set of samples harboring the same mutation (for full details, see Table S9).

D. P553L, P574L, E605K, N458Y, R561H three-loci haplotype distribution.

**P553L**

|    |        |
|----|--------|
| 38 | 64.0 % |
| 32 | 14.0 % |
| 1  | 7.0 %  |
| 3  | 7.0 %  |
| 66 | 7.0 %  |

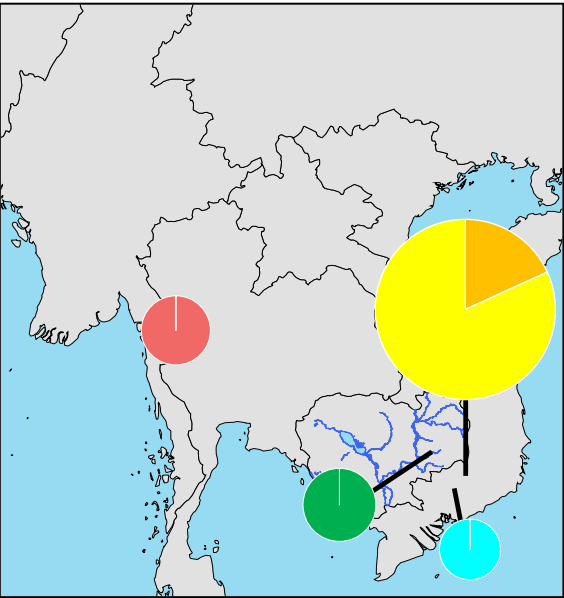

**P574L**

|    |        |
|----|--------|
| 31 | 20.0 % |
| 50 | 20.0 % |
| 60 | 20.0 % |
| 40 | 10.0 % |
| 55 | 10.0 % |
| 64 | 10.0 % |
| 30 | 10.0 % |

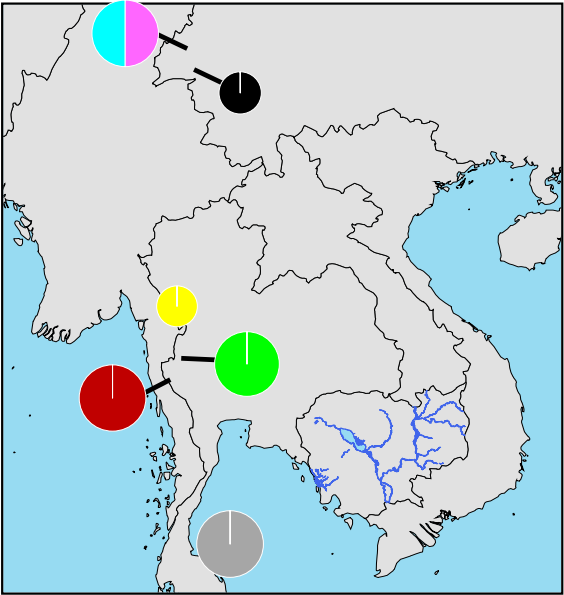

**E605K**

|    |        |
|----|--------|
| 53 | 66.0 % |
| 54 | 34.0 % |

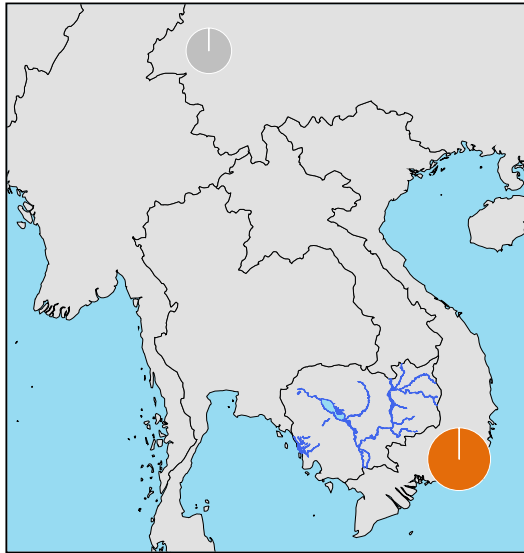

**N458Y**

|    |        |
|----|--------|
| 78 | 75.0 % |
| 76 | 25.0 % |

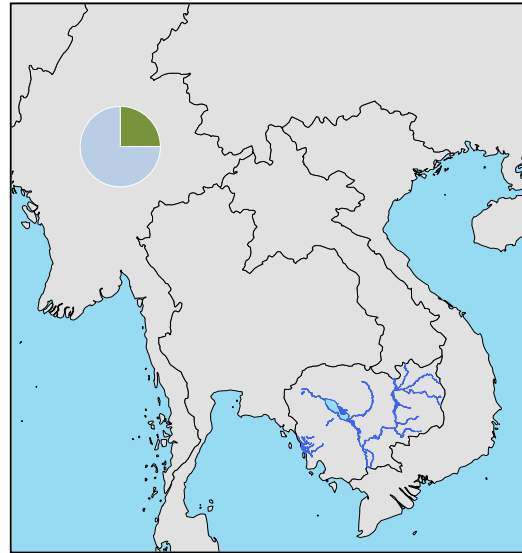

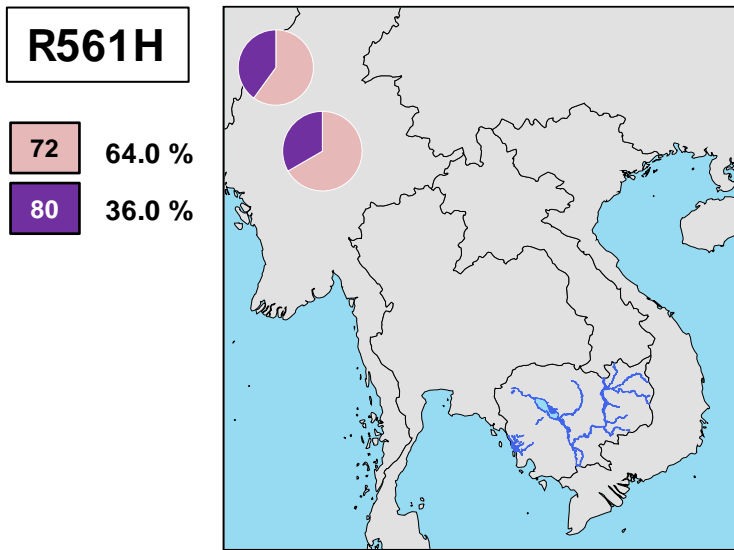

Colored-pies represent the proportion of P553L-, P574L-, E605K-, N458Y- and R561H-haplotypes observed by site. Numbers refer (left side) to the flanking haplotype ID (see Table S9) and percentages indicate the relative frequency of each three-loci haplotype in the set of samples harboring the same mutation (for full details see Table S9)





Haplotype distribution of A578S in 35 isolates (32 from Africa and 3 from Asia, 2 samples from Bangladesh <sup>1</sup> were included for this analysis) .The colored-squares represent one isolate and number inside the colored-square, the flanking haplotype ID. Haplotype numbering is indicated in Table S9 and sequence of individual PF3D7\_1337500 (K13\_151) and PF3D7\_1339700 (K13\_159) alleles is shown in Table S8. The squares with heavy lines indicate the 4 haplotypes observed in 2 samples (H5, H15, H19 and H22). For details about the samples, see Table S9.

<sup>1</sup> Mohon AN, Alam MS, Bayih AG, et al. Mutations in *Plasmodium falciparum* K13 propeller gene from Bangladesh (2009-2013). Malar J 2014;13:431.

**Figure S11.** Mean survival rates (expressed as percent of viable parasites) of the Dd2, Dd2<sup>A578S</sup> and Dd2<sup>C580Y</sup> gene-edited lines in the RSA<sup>0-3h</sup>, KARMA study 2014.

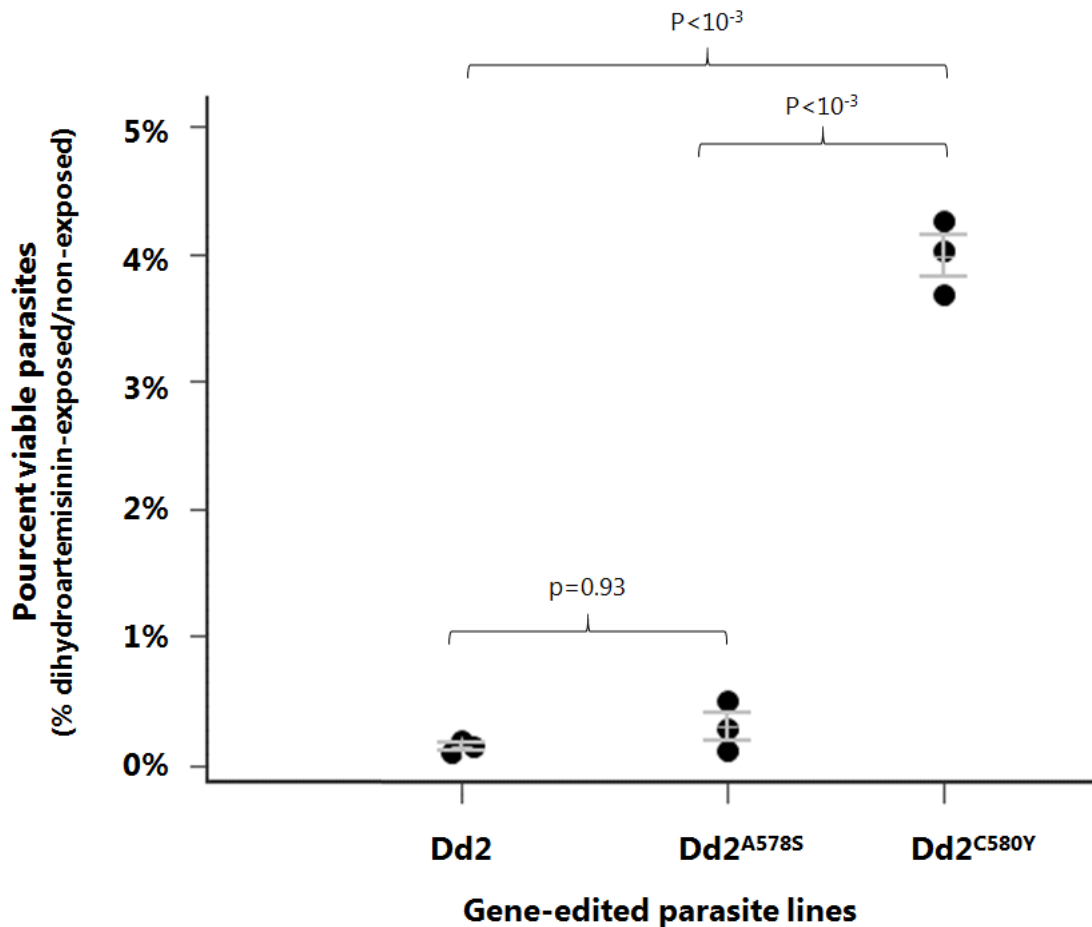

RSA survival rates (% of viable parasites) were as follows: for Dd2 (N=3 independent assays, mean=0.14 ± Standard Error of the Mean=0.03); for Dd2<sup>A578S</sup> (N=3 independent assays, mean=0.29 ± Standard Error of the Mean=0.11) and for Dd2<sup>C580Y</sup> (N=3 independent assays, mean=4.01 ± Standard Error of the Mean=0.16).

Two-sample t tests with unequal variances were used to assess for statistically significant differences between K13-edited clones and their comparator lines. No statistical difference between Dd2 and Dd2<sup>A578S</sup> survival rates (adjusted p-value in multiple comparisons = 0.93) were found, while survival rates of Dd2<sup>C580Y</sup> significantly differed from Dd2 (adjusted p-value in multiple comparisons <10<sup>-3</sup>) or from Dd2<sup>A578S</sup> (adjusted p-value in multiple comparisons <10<sup>-3</sup>). The test of differences in proportions (one-way analysis of variance) shows that the mean survival rates of Dd2<sup>A578S</sup> and the Dd2<sup>C580Y</sup> positive control were statistically different (p<10<sup>-2</sup>).

The horizontal lines represent the means and whiskers, the 95% confidence levels. The limit of detection of viable parasites was estimated 0.06% parasitemia (number of red blood cells counted in each assay = 30,000).

**Figure S12.** Distribution of the day3 positivity cases according to the K13 NS mutation detected in the day0 isolate in 2450 patients receiving a 7-day artesunate monotherapy or standard 3-day course of ACT#, KARMA study 2014.

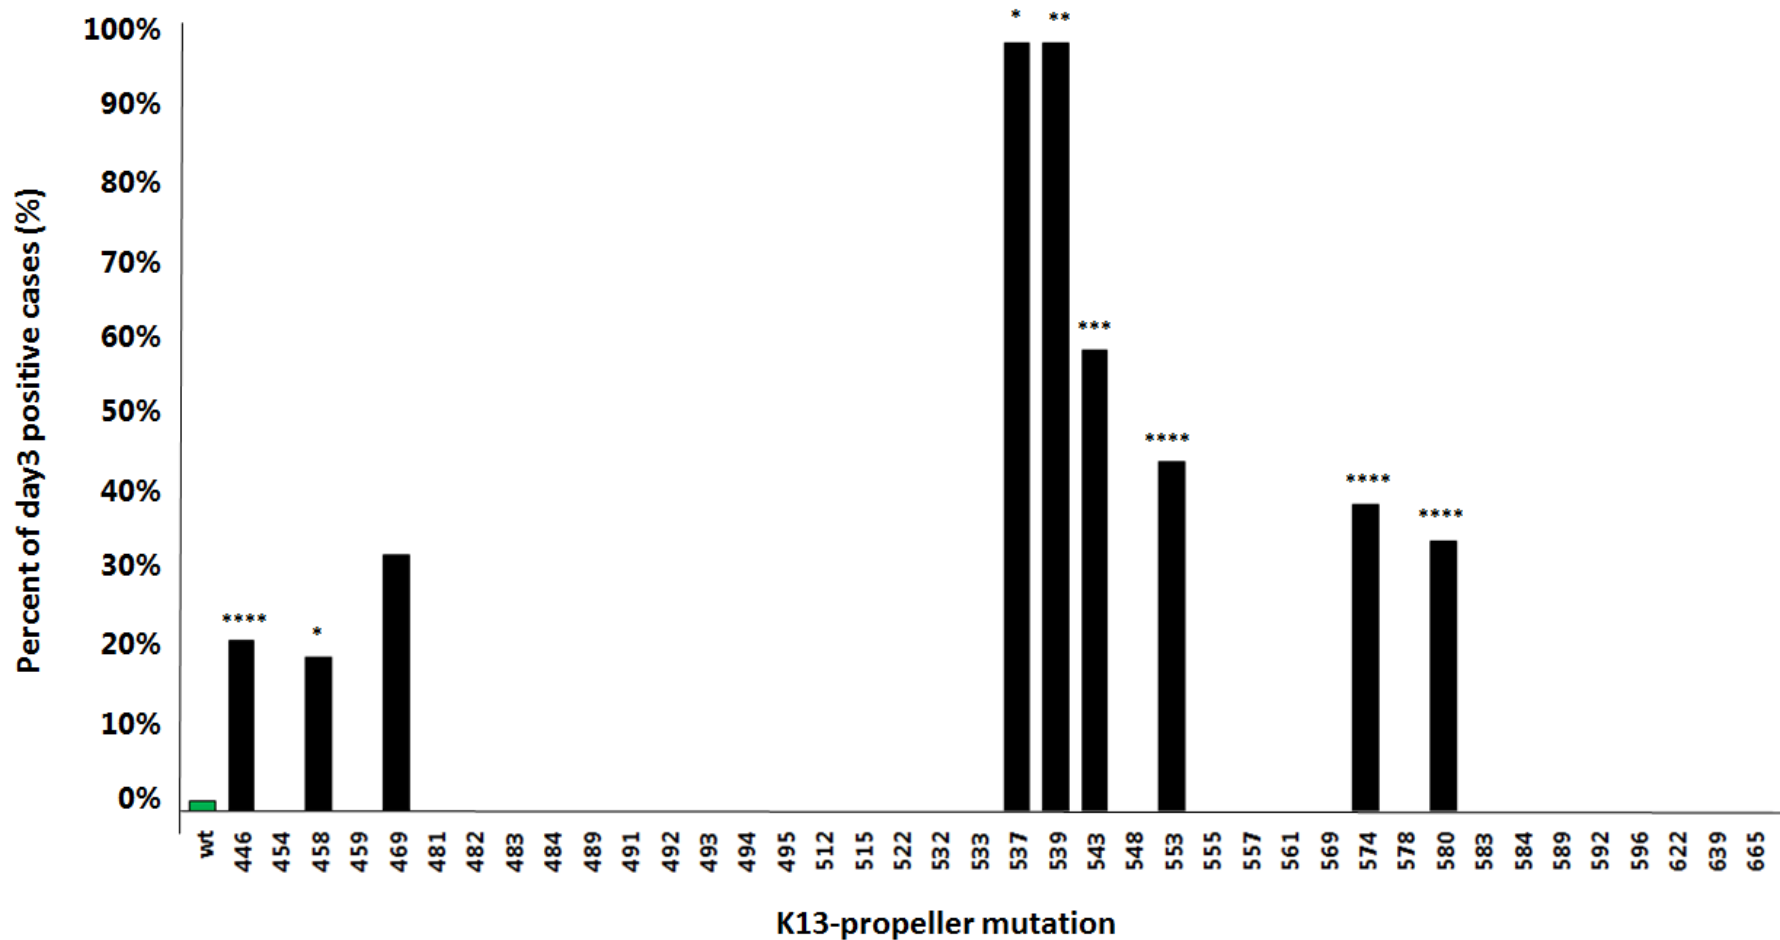

#ACT treatments were: artemether/lumefantrine, artesunate/amodiaquine, artesunate/sulfadoxine-pyrimethamine or dihydroartemisinin/piperaquine.

The graph shows the percent of day3 positive cases for each mutation observed in the group of 2450 patients enrolled in therapeutic efficacy studies : wild-type (1.4%, 30/2105); F446I (22.3%, 25/112,  $P < 0.0001$ , Fisher exact test, compared to the percent of day3 positive case observed in patients harboring wild-type allele), N458Y (20.0%, 2/10,  $P < 0.05$ ), C469Y (33%, 1/3,  $P > 0.05$ ), N537D (100%, 1/1,  $P < 0.05$ ), R539T (100%, 2/2,  $P < 0.01$ ), I543T (60%, 3/5,  $P < 0.001$ ), P553L (45.5%, 10/22,  $P < 0.0001$ ), P574L (40%, 4/10,  $P < 0.0001$ ) and C580Y (35.2%, 43/122  $P < 0.0001$ ). For the others mutations (V454A, N=3; S459L, N=2; A481V, N=2; Y482S, N=1; F483S, N=2; G484R, N= 1; N489S, N=1; F491S, N=1; L492S, N=1; Y493C, N=1; V494L, N=1; F495L, N=1; D512N, N=1; R515K, N=1; S522C, N=3; C532S, N=1; G533S, N=1; G548D, N=1; V555A, N=1; A557S, N=1; R561H, N=13; A569T, N=1; A578S, N=9, F583L, N=1; D584V, N=1; V589I, N=1; G592R, N=1; E596K, N=1; R622I, N=1; G639S, N=1; G655S, N=1), no day3 positive case was recorded. \*  $P < 0.05$ , \*\*  $P < 0.01$ , \*\*\*  $P < 0.001$  and \*\*\*\*  $P < 0.0001$

**Figure S13.** Schematic representation of the frequency of NS-mutants mapped to the individual K13 kelch domains, KARMA study 2014.

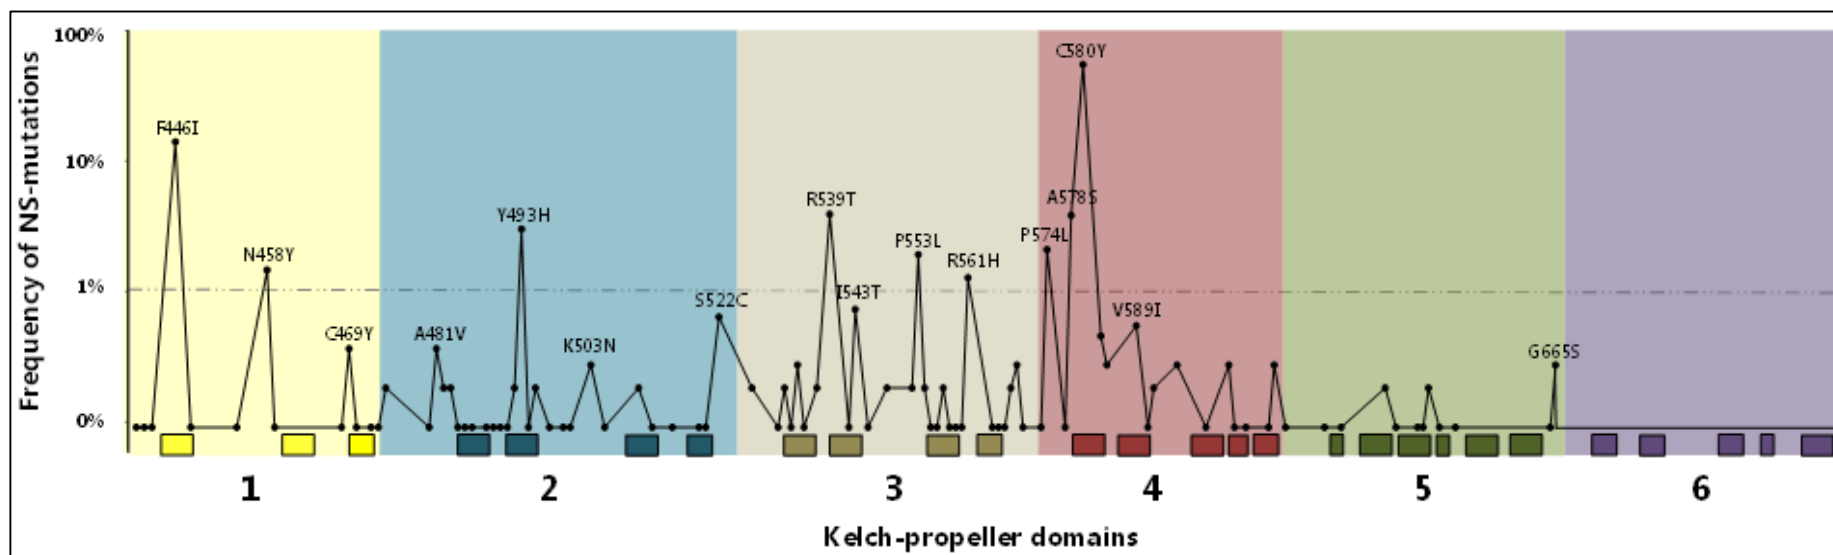

Individual Kelch domains are colored in yellow (domain 1), blue (domain 2), brown (domain 3), red (domain 4), green (domain 5) and purple (domain 6). Colored-rectangles underneath correspond to the positions of the  $\beta$ -sheets in each kelch-propeller domain in the crystal structure of the wild type BTB-POZ propeller domain (PDB AYY8).

**Figure S14.** Mapping of K13 mutations on the crystal structure of *P. falciparum* K13 BTB-POZ propeller domain (PDB 4YY8), KARMA study 2014.

**A. Two views of the K13 BTB-POZ-Kelch propeller dimer.**

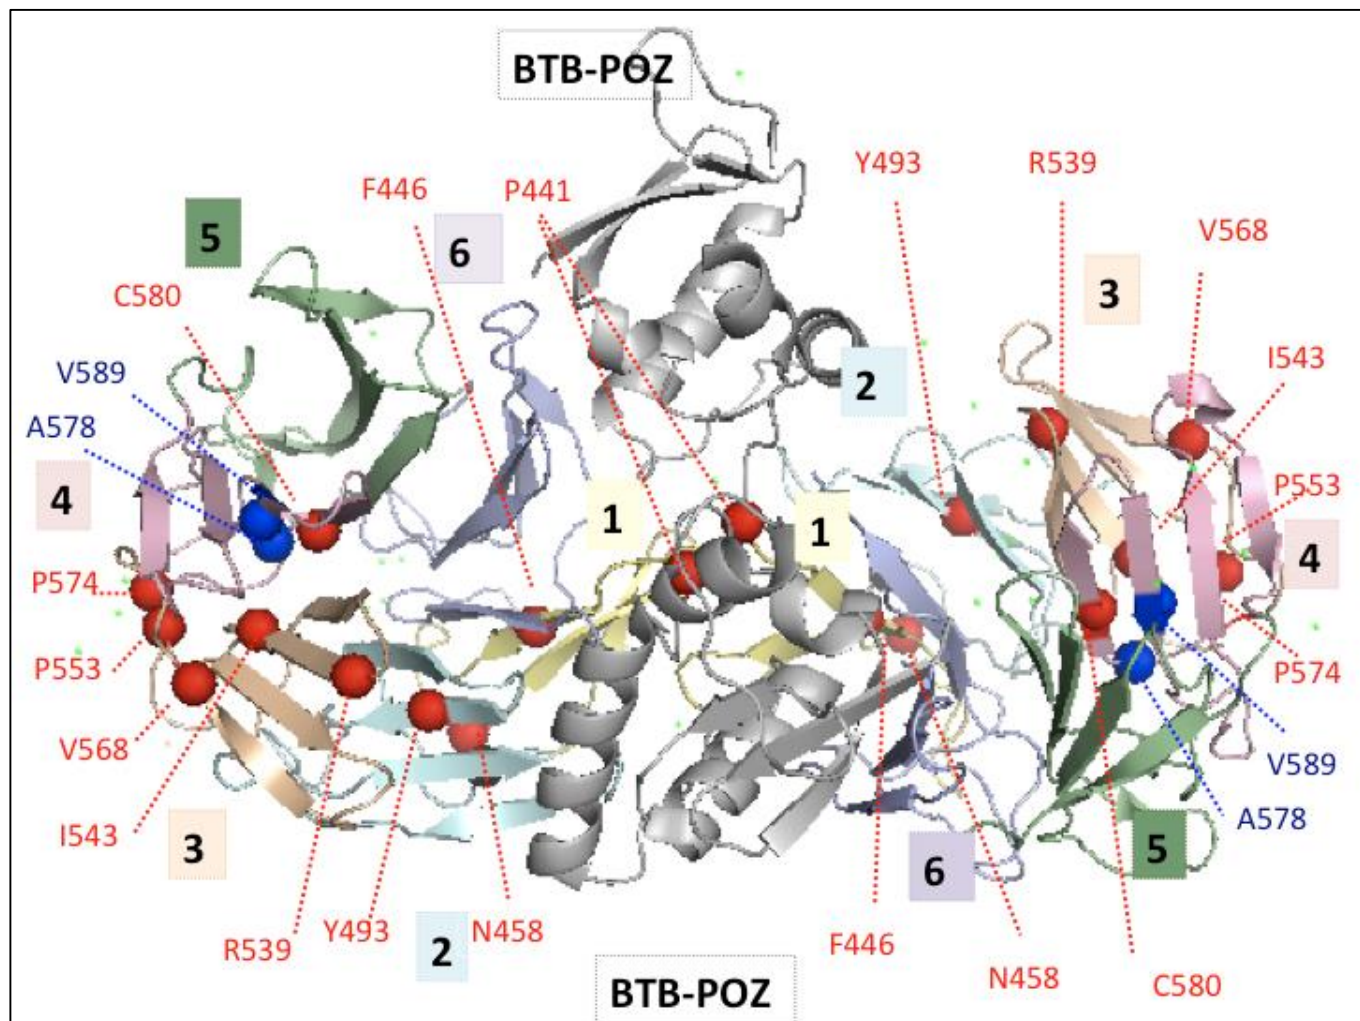

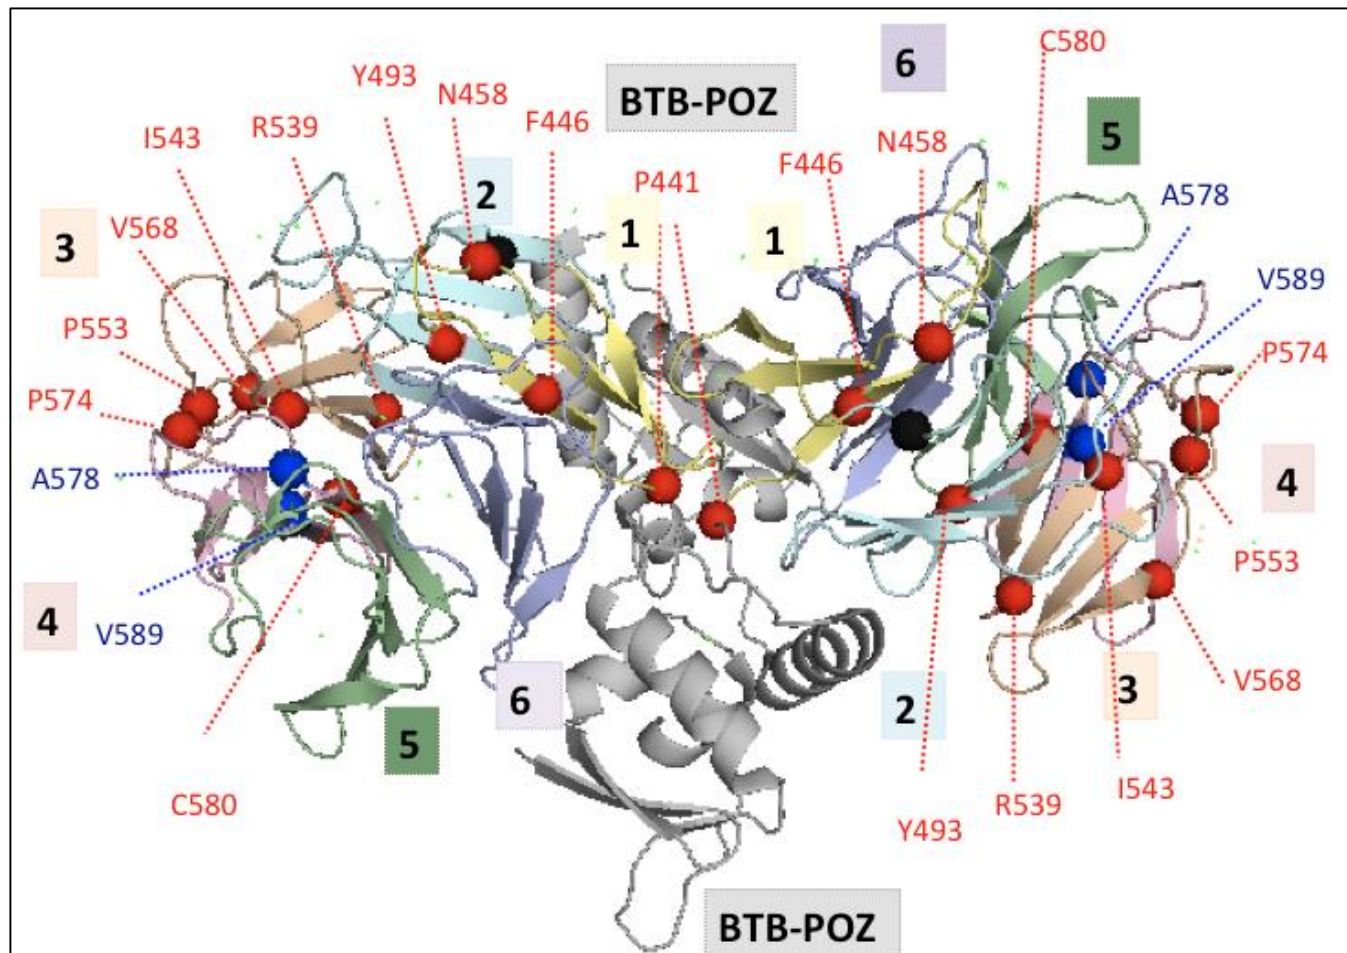

Localization of the mutants was prepared using PyMOL Molecular Graphics System version 1.5.0.4 (<http://www.pymol.org>). Grey: BTB-POZ ; individual kelch domains are color-coded as yellow, pale cyan, wheat, pale pink, pale green and pale blue for kelch domain 1, 2, 3, 4, 5 and 6 respectively. Red colored spheres correspond to the resistance-associated mutations (validated and associated). A578 and V589 are indicated in blue.

## B. Localization and environment of some mutations.

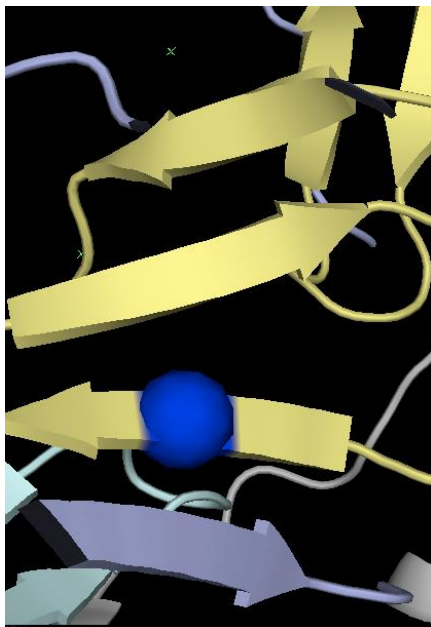

F446I (blue sphere) in the context of the 4<sup>th</sup>  $\beta$ -sheeted blade 1 F446 is located in the 2<sup>nd</sup>  $\beta$ -sheet, the first one being provided by the C-terminal sequence of K13

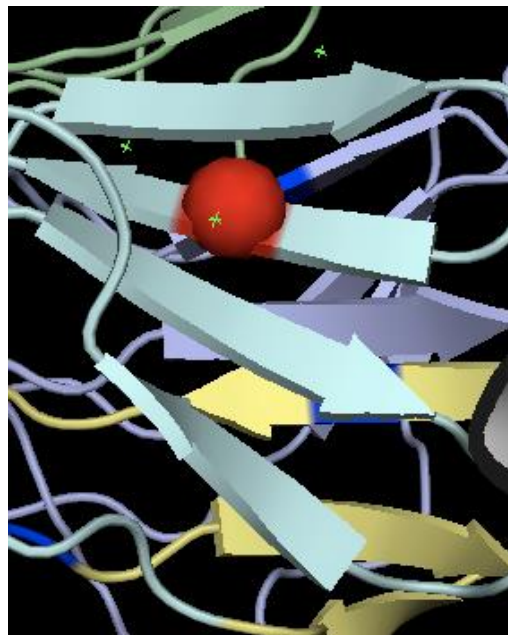

Position of Y493 (red sphere) in the 2<sup>nd</sup>  $\beta$ -sheet of kelch domain

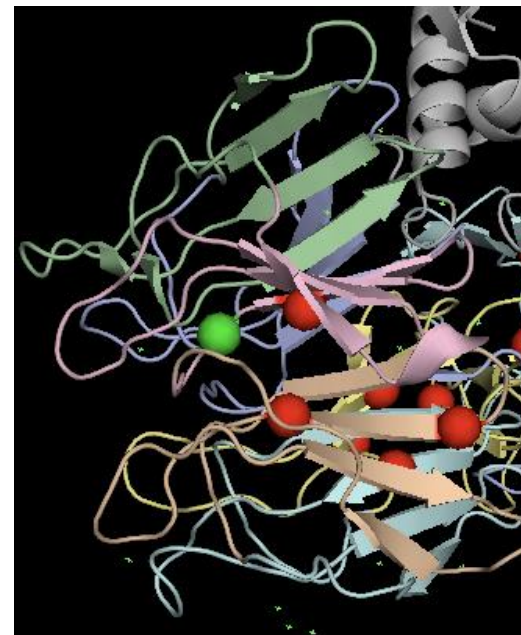

A578S (green) is located within the blade3-blade4 junction region. Resistance-associated mutations of kelch domains 3 and 4 are shown as red spheres



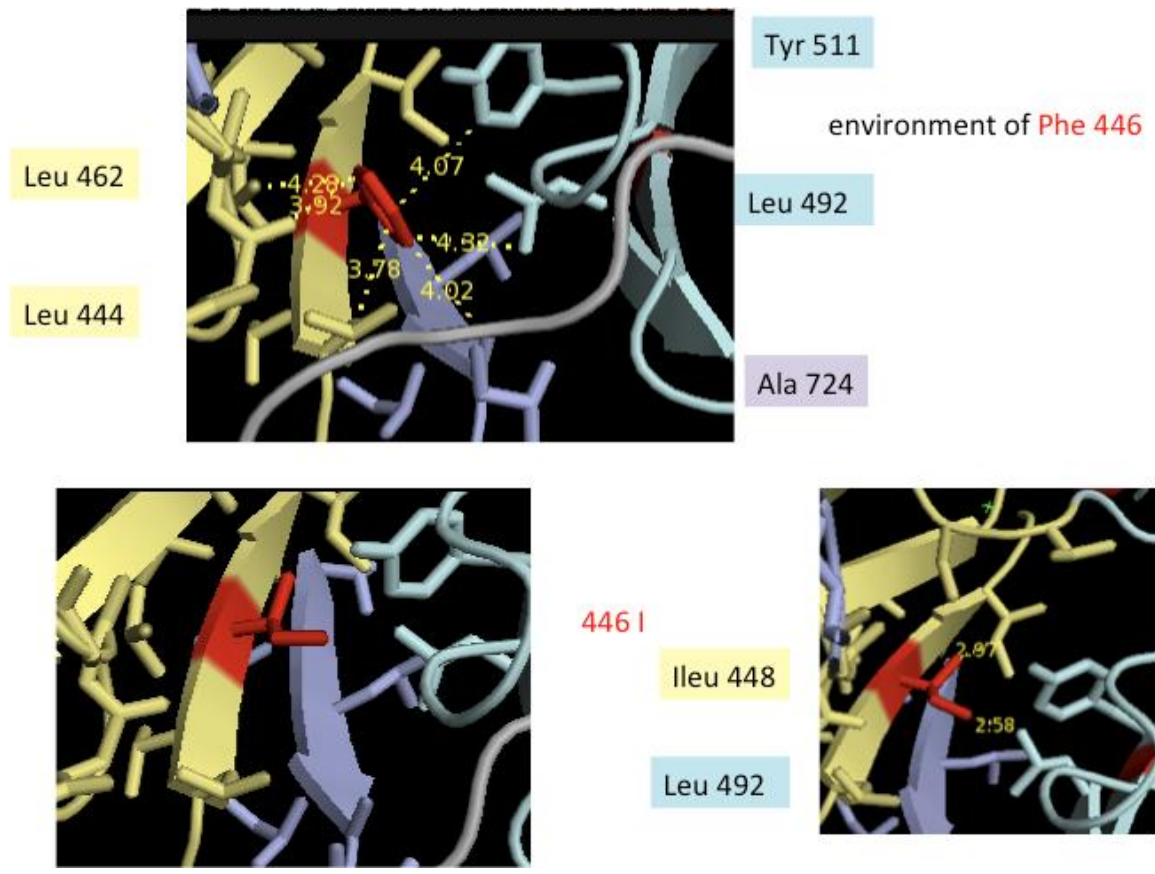

Distances (in Å) between atoms are indicated in yellow

The structure (X-Ray diffraction with resolution of 1.81 Angström) has been solved by Jiang DQ, Tempel W, Loppnau P, Graslund S, He H, Ravichandran M, Seitova A, Arrowsmith CH, Edwards AM, Bountra C, Ei Bakkouri M, Senisterra G, Osman KT, Lovato DV, Hui R, Hutchinson A, Lin YH, Structural Genomics Consortium and released in April 2015.

**Table S1.** The K13-toolbox: reagents, quality controls and detailed standard operating procedures provided to partners involved in the KARMA consortium, KARMA study 2014.

### **List of needed equipments, consumables & reagents**

---

#### **Equipments**

- Thermocycler
- 2 Heating blocks for 1.5 ml tubes (or 1 heating block and 1 incubator)
- Centrifuge for 1.5 ml tubes
- Scissors and tweezers
- (Bunsen burner)
- P1000/ P200/ P20/ P10 pipets
- Weighting scale (for preparation Saponin solution and agarose gel)
- All equipments to perform agarose gel electrophoresis: microwave, generator, gel tank, UV illuminator

#### **Consumables**

- PCR plates & seal
- 1.5 ml tubes

#### **Reagents**

- RNase/DNase free water
- Agarose
- Ethidium bromide
- TBE 1X buffer
- Loading dye
- MW Marker

### **K13 tool box**

---

#### **Reagents**

- QiaAmp DNA mini kit (250 tests/kit) – Qiagen # 51306
- 5x HOT FIREPol blend Master mix with 12.5 mM MgCl<sub>2</sub> (tubes of 1 ml) – Solis Biodyne # 04-27-00125
- Set of Primers: 4 tubes of primers (K13\_PCR\_F&R; K13\_N1\_F&R) – Sigma
- PBS tablets (Sigma – P4417)
- Saponin (Sigma – 84510-500G)

#### **Quality Controls**

Dried Blood spots K13\_1, K13\_2, K13\_3, K13\_4, K13\_5, and K13\_6

## KARMA project - Qiagen DNA Purification from Dried Blood Spot

---

### 1. Object

This procedure describes the method used for parasite DNA extraction from Dried Blood Spots using the spin protocol of the QIAamp Mini kit.

### 2. Introduction

The QIAamp DNA Mini Kit is used for DNA isolation from Dried Blood Spots with fast spin-column procedures. DNA binds specifically to the QIAamp silica-gel membrane while contaminants pass through. QIAamp DNA technology yields parasite DNA from Dried Blood Spots ready to use in PCR procedures. Yield expected with this method from a 3mm blood spot: 75-150 ng.

### 3. Associated documents and files

QIAamp DNA Mini and Blood Mini Handbook 04/2010

### 4. Hygiene and security

Universal safety precautions should be taken when handling chemicals and potentially infectious specimens. PPE (lab coat and gloves) are to be worn at all time. **DO NOT add bleach or acidic solutions directly to the sample-preparation waste.** The sample-preparation waste contains guanidine hydrochloride from Buffers AL and AW1, which can form highly reactive compounds when combined with bleach.

If liquid containing these buffers is spilt, clean with suitable laboratory detergent and water. If the spilt liquid contains potentially infectious agents, clean the affected area first with laboratory detergent and water, and then with 1% (v/v) sodium hypochlorite.

For more information, please consult the laboratory biosafety manual and the QIAamp DNA Mini Kit MSDS.

### 5. Reagents and consumables

#### 5.1. Reagents

| Reagent name              | Producer | Reference  | Technical data                          |
|---------------------------|----------|------------|-----------------------------------------|
| QIAamp DNA Mini Kit (250) | Qiagen   | 51306      | Qiagen DNA Mini and Blood Mini Handbook |
| Saponine                  | SIGMA    | 84510-500G | MSDS                                    |
| PBS tablet                | SIGMA    | P4417      | MSDS                                    |
| Alcohol 70%               |          |            |                                         |
| Bleach 10%                |          |            |                                         |

#### 5.2. Consumables

| Consumable name                       | Producer | Reference | Technical data |
|---------------------------------------|----------|-----------|----------------|
| Kit consumables (spin columns; tubes) | Qiagen   | 51306     |                |
| Tips 10, 20, 200 & 1000 µl            |          |           |                |
| 1.5 ml tubes                          |          |           |                |
| Stericup                              |          |           |                |

## 6. Equipment needed

- Heating block for 1.5ml and one incubator (or 2 heating blocks)
- Centrifuge for 1.5ml
- Bunsen burner
- Scissors and twisters
- PH meter
- Vortex
- P1000, P200, P20 pipets

## 7. Procedures

### 7.1. Preparation of reagents

*QIAGEN reagents (when starting a new kit)*

QIAGEN Protease stock solution (stable up to 2 months at 2–8°C or longer at –20°C)

Before using it for the first time, pipet 5.5 ml protease solvent into the vial containing lyophilized QIAGEN Protease, as indicated on the label. Date the vial.

Buffer AL (stable up to 1 year at room temperature, 15–25°C)

Mix Buffer AL thoroughly by shaking or vortexing before use.

Buffer AW1 (stable up to 1 year at room temperature, 15–25°C)

Before using it for the first time, add the appropriate amount of ethanol (96–100%) to Buffer AW1 concentrate as indicated on the bottle. Label the bottle: date, name and tick inside the square on the top of the bottle

Buffer AW2 (stable up to 1 year at room temperature, 15–25°C)

Before using for the first time, add the appropriate amount of ethanol (96–100%) to Buffer AW2 concentrate as indicated on the bottle. Label the bottle: date, name and tick inside the square on the top of the bottle.

### *Cell lysis reagents preparation*

Saponine 10%

- Weight 1g of saponine in a 10ml flask"
- Add 10 ml of distilled water
- Filtration using a stericup
- Store at 4C

PBS 1X

Dissolve one tablet in 200 ml of distilled water.

Store at ambient temperature

### 7.2. Sample preparation

1. Prepare the bench to work under **sterile condition** for sample preparation:

- prepare a 15ml/50ml tube of absolute ethanol
- Place a piece of aluminium foil on the bench
- Light the Bunsen burner

2. Disinfect scissors and tweezers by soaking them in absolute ethanol and passing them through the Bunsen flame.

3. Hold the DBS filter with the sterile tweezers. Cut the dried blood spot with sterile scissors, then cut it in small pieces (few mm squares).

4. Transfer the DBS pieces in 1.5 ml labeled tube.

Note 1: sterilize scissors and tweezers between each samples

Note 2: Always extract quality controls at the same time as the samples

### 7.3. Cell lysis

1. Add 1 ml of PBS 1X/ Saponine 0.5% per tube (950  $\mu$ l PBS 1X + 50  $\mu$ l saponine 10%), mix gently

2. Incubate at 4°C for at least 1h30min (or overnight)

3. Remove the liquid

4. Wash filters with 1 ml PBS 1X per tube

5. Incubate 5 min at 4°C

6. Repeat the last 3 steps (Second wash)

### 7.4. Procedure for DNA purification

Notes: All centrifugation steps are carried out at room temperature (15–25°C).

#### *Things to do before starting*

- Prepare one heating block at 85°C for use in step 2, and one heating block (or incubator) at 56°C for use step 3

- Equilibrate Buffer AE to room temperature for elution in step.16.

- Ensure that Buffer AW1 and Buffer AW2 have been prepared according to the instructions on section 7.1.1.

- If a precipitate has formed in Buffer AL or Buffer ATL, dissolve by incubating at 56°C.

- Clean bench and pipettes with bleach 10%

#### *Qiagen kit procedure:*

1. Add **180  $\mu$ l of Buffer ATL per tube**

2. Incubate at **85°C for 30 min**. Briefly centrifuge to remove drops from inside the lid.

3. Add **20  $\mu$ l proteinase K** QIAGEN stock solution. Mix by vortexing, and incubate at **56°C for 1 h**. Briefly centrifuge to remove drops from inside the lid.

Note: Set up the incubator at 70°C for next step.

4. Add **200  $\mu$ l Buffer AL** to the sample. Mix thoroughly by vortexing, and incubate at **70°C for 30 min**. Briefly centrifuge to remove drops from inside the lid. In order to ensure efficient lysis, it is essential that the sample and Buffer AL are mixed immediately and thoroughly.

**Note:** Do not add proteinase K directly to Buffer AL.

5. Add **200 µl ethanol (96–100%)** to the sample, and mix again by pulse vortexing for 15 s. After mixing, briefly centrifuge the 1.5 ml microcentrifuge tube to remove drops from the inside of the lid.
6. Carefully transfer the mixture from step 5 to the **QIAamp Mini spin column** (place in a clean 2 ml collection tube) without wetting the rim. Close the cap of spin column in order to avoid aerosol formation during centrifugation.
7. **Centrifuge** at 8,000 rpm for 1 min.  
Note: If the lysate has not completely passed through the column after centrifugation, centrifuge again at higher speed (10,000 rpm) until the QIAamp Mini spin column is empty.
8. Place the QIAamp Mini spin column in a **new clean 2 ml collection tube** and discard the old collection tube containing the filtrate.
9. Carefully open the QIAamp Mini spin column and add **500 µl Buffer AW1** without wetting the rim. Close the cap.
10. **Centrifuge** at 8,000 rpm for 1 min.
11. Place the QIAamp Mini spin column in a new clean 2 ml collection tube and discard the old collection tube containing the filtrate.
12. Carefully open the QIAamp Mini spin column and add **500 µl Buffer AW2** without wetting the rim. Close the cap.
13. **Centrifuge** at 13,000 rpm for 3 min.
14. Discard the filtrate from the 2 ml collection tube. Replace the QIAamp Mini spin column in the 2 ml collection tube and **centrifuge** at full speed for 3 min. This step helps to eliminate the chance of possible Buffer AW2 carryover.
15. Place the QIAamp Mini spin column in a **new clean 1.5 ml microcentrifuge tube** (not provided), and discard the 2 ml collection tube containing the filtrate. Allow the column to **dry for 1 to 5 min**.
16. Carefully open the QIAamp Mini spin column and add **100 µl Buffer AE**. **Incubate at room temperature** (15–25°C) for **5 min**, and then **centrifuge** at 10,000 rpm for 1 min.
17. Storage DNA at 4°C for short-term storage (DNA will be use for PCR in the following days). For long-term storage of DNA, store DNA at –20°C or – 80°C. Avoid freezing / thawing samples.

## KARMA project - Qiagen DNA Purification from whole blood

---

### 1. Object

This procedure describes the method used for DNA purification (genomic, mitochondrial, and viral) from whole blood using the spin protocol of the QIAamp Mini kit.

### 2. Introduction

The QIAamp DNA Mini Kit is used for DNA isolation from whole blood with fast spin-column procedures. DNA binds specifically to the QIAamp silica-gel membrane while contaminants pass through. QIAamp DNA technology yields parasite DNA from whole blood ready to use in PCR.

*Yields with the QIAamp DNA Mini Kit*

| Sample         | Yield                     |         |
|----------------|---------------------------|---------|
|                | Total nucleic acids (µg)* | DNA     |
| Blood (200 µl) | 4–12                      | 4–12 µg |

### 3. Associated documents and files

QIAamp DNA Mini and Blood Mini Handbook 04/2010

### 4. Hygiene and security

Universal safety precautions should be taken when handling chemicals and potentially infectious specimens. PPE (lab coat and gloves) are to be worn at all time. **DO NOT add bleach or acidic solutions directly to the sample-preparation waste.** The sample-preparation waste contains guanidine hydrochloride from Buffers AL and AW1, which can form highly reactive compounds when combined with bleach.

If liquid containing these buffers is spilt, clean with suitable laboratory detergent and water. If the spilt liquid contains potentially infectious agents, clean the affected area first with laboratory detergent and water, and then with 1% (v/v) sodium hypochlorite.

For more information, please consult the laboratory biosafety manual and the QIAamp DNA Mini Kit MSDS.

## 5. Reagents and consumables

### 5.1. Reagents

| Reagent name              | Producer | Reference | Technical data                          |
|---------------------------|----------|-----------|-----------------------------------------|
| QIAamp DNA Mini Kit (250) | Qiagen   | 51306     | Qiagen DNA Mini and Blood Mini Handbook |
| PBS                       |          |           |                                         |

### 5.2. Consumables

| Consumable name                                                                     | Producer | Reference | Technical data |
|-------------------------------------------------------------------------------------|----------|-----------|----------------|
| Kit consumables (spin columns; tubes)<br>Tips 10, 20, 200 & 1000 µl<br>1.5 ml tubes | Qiagen   | 51306     |                |

## 6. Equipment needed

- Heating block for 1.5 ml tubes or incubator
- Centrifuge for 1.5 ml tubes
- Vortex
- P1000, P200, P20 pipets

## 7. Procedures

### 7.1. Preparation of reagents (when starting a new kit)

QIAGEN Protease stock solution (stable up to 2 months at 2–8°C or longer at –20°C)  
Before first use, pipet 5.5 ml protease solvent into the vial containing lyophilized QIAGEN Protease, as indicated on the label. Date the vial.

Buffer AL (stable up to 1 year at room temperature, 15–25°C)  
Mix Buffer AL thoroughly by shaking or vortexing before use.

Buffer AW1 (stable up to 1 year at room temperature, 15–25°C)  
Before first use, add the appropriate amount of ethanol (96–100%) to Buffer AW1 concentrate as indicated on the bottle. Label the bottle: date, name and tick · inside the square on the top of the bottle

Buffer AW2 (stable up to 1 year at room temperature, 15–25°C)  
Before first use, add the appropriate amount of ethanol (96–100%) to Buffer AW2 concentrate as indicated on the bottle. Label the bottle: date, name and tick · inside the square on the top of the bottle.

### 7.2 DNA purification



Notes:

- All centrifugation steps are carried out at room temperature (15–25°C).
- 200 µl of whole blood yields 3–12 µg of DNA.

*Things to do before starting*

- Equilibrate samples to room temperature.
- Set up the heating block (or incubator) at 56°C.
- Equilibrate Buffer AE or distilled water to room temperature for elution in step 17.
- Ensure that Buffer AW1, Buffer AW2, and QIAGEN Protease have been prepared according to the instructions in section 7.1.
- if a precipitate has formed in Buffer AL, dissolve by incubating at 56°C.
- Clean bench with bleach 10%.

*Procedure*

1. Pipet **20 µl QIAGEN Protease K** into the bottom of a 1.5 ml microcentrifuge tube.
2. Add **200 µl sample** to the microcentrifuge tube:
  - 200 µl of whole blood or
  - 100 µl of red blood cells pellet + 100 µl PBSNote: If the amount of blood is less than 200µl, add sufficient PBS to reach 200µl. If the whole blood is too viscous, add PBS.
3. Add **200 µl Buffer AL** to the sample. Mix by pulse-vortexing for 15 s.  
In order to ensure efficient lysis, it is essential that the sample and **Buffer AL** are mixed thoroughly to yield a homogeneous solution.  
Note: Do not add QIAGEN Protease or proteinase K directly to Buffer AL.
4. Incubate at **56°C for 20 min** (prepare spin column for step 7 to save time).
5. Briefly **centrifuge** the 1.5 ml microcentrifuge tube to remove drops from the inside of the lid.
6. Add **200 µl ethanol (96–100%)** to the sample, and mix again by pulse vortexing for 15 s. After mixing, briefly centrifuge the 1.5 ml microcentrifuge tube to remove drops from the inside of the lid.
7. Carefully transfer the mixture from step 6 to the QIAamp Mini spin column (place in a clean 2 ml collection tube) without wetting the rim. Close the cap of spin column in order to avoid aerosol formation during centrifugation
8. **Centrifuge** at 8,000 rpm for 1 min..  
Note: If the lysate has not completely passed through the column after centrifugation, centrifuge again at higher speed (10,000 rpm) until the QIAamp Mini spin column is empty.
9. Place the QIAamp Mini spin column in a new clean 2 ml collection tube and discard the old collection tube containing the filtrate.

10. Carefully open the QIAamp Mini spin column and add **500 µl Buffer AW1** without wetting the rim. Close the cap.
11. Centrifuge at 8,000 rpm for 1 min.
12. Place the QIAamp Mini spin column in a new clean 2 ml collection tube and discard the old collection tube containing the filtrate.
13. Carefully open the QIAamp Mini spin column and add **500 µl Buffer AW2** without wetting the rim. Close the cap.
14. **Centrifuge** at 13,000 rpm for 3 min.
15. Discard the filtrate from the 2 ml collection tube. Replace the QIAamp Mini spin column in the 2 ml collection tube and **centrifuge** at full speed for 3 min. This step helps to eliminate the chance of possible Buffer AW2 carryover.
16. Place the QIAamp Mini spin column in a clean 1.5 ml microcentrifuge tube (not provided), and discard the 2 ml collection tube containing the filtrate.
17. Carefully open the QIAamp Mini spin column and add **200 µl Buffer AE**. Incubate at room temperature (15–25°C) for **5 min**, and then centrifuge at 10,000 rpm for 1 min.
18. Storage DNA at 4°C for short-term storage (DNA will be use for PCR in the following days). For long-term storage of DNA, store DNA at –20°C or – 80°C. Avoid freezing / thawing samples.

## **KARMA Project - K13 PCR assay**

---

### **1. Purpose**

This procedure is designed to genotype point mutations on chromosome 13 (PF3D7\_1343700) in Kelch protein propeller domain of Plasmodium falciparum. Presence of mutations in this gene was demonstrated to strongly correlate with artemisinin resistance (Ariey et al, 2014).

### **2. Scope**

This procedure is intended for use in molecular studies of DNA extracted from dried blood spots or whole blood samples for genotyping of P. falciparum infections. It describes the genotyping procedure for SNPs (Single Nucleotide Polymorphism) detection in Kelch protein propeller domain of Plasmodium falciparum (PF3D7\_1343700).

Full gene sequences are given in Appendix A and SNPs already observed are given in Appendix B. This procedure is applicable for well-equipped laboratories with staff familiar with PCR and sequencing.

### 3. Hygiene and security

- Always wear gloves and lab coat when handling samples.
- Wear a dedicated lab coat when working in the electrophoresis room.
- Wear Nitrile gloves when working with 10X TBE, Ethidium Bromide, or when working with a 1X TBE solution that contains Ethidium Bromide.

Ethidium Bromide is a **mutagen** and should be handled with extreme caution.

### 4. Materials and Equipment

#### 4.1. Materials

- General
  - Micropipets and tips (10  $\mu$ L, 200  $\mu$ L and 1000  $\mu$ L)
  - 1.5 mL centrifuge tubes
  - PCR tubes with caps
  - Disposable gloves
  - Fine tip marker pens
  - Nuclease-free water
- PCR
  - 5x HOT FIREPol Blend Master mix with 12.5 mM MgCl<sub>2</sub>, (Solis Biodyne #04-27-00125)
  - Primers for PCR and nested PCR (see Table 1)
  - IPC\_K13 DNA Controls
- Agarose gel electrophoresis
  - Loading dye
  - Ethidium bromide (10 mg/mL)
  - Agarose
  - 1X TBE (Tris/Borate/EDTA) buffer
  - 50 bp or 100 bp or 200 bp size standard with xylene cyanol dye added or ready-to-use MW marker
  - Parafilm

**Table 1.** Primary and secondary forward (F) and reverse (R) PCR primers

| Primer name | PCR      | Sequence (5' – 3')   |
|-------------|----------|----------------------|
| K13_PCR_F   | PCR      | CGGAGTGACCAAATCTGGGA |
| K13_PCR_R   |          | GGGAATCTGGTGGTAACAGC |
| K13_N1_F    | Nested 1 | GCCAAGCTGCCATTCATTTG |
| K13_N1_R    |          | GCCTTGTTGAAAGAAGCAGA |

#### 4.2. Equipment

- Thermocycler
- Gel electrophoresis apparatus including chamber and power pack
- Microwave to melt agarose
- Vortex, mini-centrifuge

– P1000, P200, P20, P10 pipettman

## 5. Procedure

### 5.1. PCR

1. Prepare Primary PCR Master Mixes in a 1.5 mL centrifuge tube according to the volumes calculated using Table 2. Include enough reactions for DNA controls (section 6) and negative (no template) controls, as shown in section 6.

**Table 2.** Master Mix calculation for Primary and Secondary PCR for PF3D7\_1343700

| Reagent | Stock Conc.                | Final Conc. | Vol. X 1 sample | Vol. X N samples |
|---------|----------------------------|-------------|-----------------|------------------|
| 1.      | Nuclease-free water        |             | 13.75 µl        |                  |
| 2.      | Primer - K13_PCR_F         | 10 µM       | 0.625 µl        |                  |
| 3.      | Primer - K13_PCR_R         | 10 µM       | 0.625 µl        |                  |
| 4.      | 5x HOT FirePol Master Mix  | 5X          | 5 µl            |                  |
|         | <b>Total (without DNA)</b> |             | <b>20 µl</b>    |                  |

2. Label PCR 96-well plate and add 20 µl Primary Master Mix to each well.

3. Add 5 µl of template DNA to each well. Seal the plate and run PCR in thermocycler according to the conditions listed in Table 3.

**Table 3.** PCR thermocycling conditions for Primary PCR for PF3D7\_1343700

| Step no. | Cycle                | Temperature (°C) | Time (min) | No. of cycles |
|----------|----------------------|------------------|------------|---------------|
| 1.       | Initial Denaturation | 95               | 15:00      | 1             |
| 2.       | Denaturation         | 95               | 0:30       | 30            |
| 3.       | Annealing            | 58               | 2:00       |               |
| 4.       | Extension            | 72               | 2:00       |               |
| 5.       | Final extension      | 72               | 10:00      | 1             |

### 5.2. Nested N1 PCR

1. Prepare nested N1 PCR Master Mixes in a 1.5 mL centrifuge tube according to the volumes calculated using Table 4.

**Table 4.** Master Mix calculation for Secondary N1 PCR for PF3D7\_1343700

|    | Reagent                   | Stock Conc. | Final Conc.  | Vol. X 1 sample             | Vol. X N samples |
|----|---------------------------|-------------|--------------|-----------------------------|------------------|
| 1. | Nuclease-free water       |             |              | 32.5 $\mu$ l                |                  |
| 2. | Primer - K13_N1_F         | 10 $\mu$ M  | 0.25 $\mu$ M | 1.25 $\mu$ l                |                  |
| 3. | Primer - K13_N1_R         | 10 $\mu$ M  | 0.25 $\mu$ M | 1.25 $\mu$ l                |                  |
| 4. | 5x HOT FirePol Master Mix | 5X          | 1X           | 10 $\mu$ l                  |                  |
|    | <b>Total</b>              |             |              | <b>45 <math>\mu</math>l</b> |                  |

2. Label PCR 96-well plate and add 45  $\mu$ l Secondary Master Mix to each well.
3. Add 5  $\mu$ l of Primary PCR product to each well. Seal the plate and run PCR in thermocycler according to the conditions listed in Table 5.

**Table 5.** PCR thermocycling conditions for Secondary N1 PCR for PF3D7\_1343700

| Step no. | Cycle                | Temperature ( $^{\circ}$ C) | Time (min) | No. of cycles |
|----------|----------------------|-----------------------------|------------|---------------|
| 1.       | Initial Denaturation | 95                          | 15:00      | 1             |
| 2.       | Denaturation         | 95                          | 0:30       | 40            |
| 3.       | Annealing            | 60                          | 1:00       |               |
| 4.       | Extension            | 72                          | 1:00       |               |
| 5.       | Final extension      | 72                          | 10:00      | 1             |

4. Run an agarose gel of Secondary N1 PCR product to ensure amplification has been successful (See Section 5.3).

**NOTE:** PCR products may be stored at 4  $^{\circ}$ C for up to 1 week or at – 20  $^{\circ}$ C or -80  $^{\circ}$ C for long-term storage.

### 5.3 Agarose gel electrophoresis

1. Make a 2% agarose gel:
  - Dissolve 2 grams of agarose and 100 mL of 1X TBE in the microwave.
  - Cool, then add 4  $\mu$ L Ethidium bromide and gently swirl to mix.
  - Pour into assembled gel tray with comb(s) and leave at room temperature for 30 minutes to set.
2. Load the gel:
  - Place the gel in gel apparatus and fill to line with 1X TBE.
  - Place 2  $\mu$ L dots of xylene cyanol per sample on Parafilm.
  - Carefully pipet 10  $\mu$ L secondary N1 PCR product to each dot of dye.
  - Add 4-5  $\mu$ L of size standard.
3. Run gel at 100-150 volts for 60 minutes and view using a UV trans-illuminator.

**Figure 1.** PCR products for Secondary N1 PCR for PF3D7\_1343700. S1: 3D7, S2-S16: tested samples, Neg: PCR negative controls (Image source: Didier Ménard, Institut Pasteur du Cambodge).

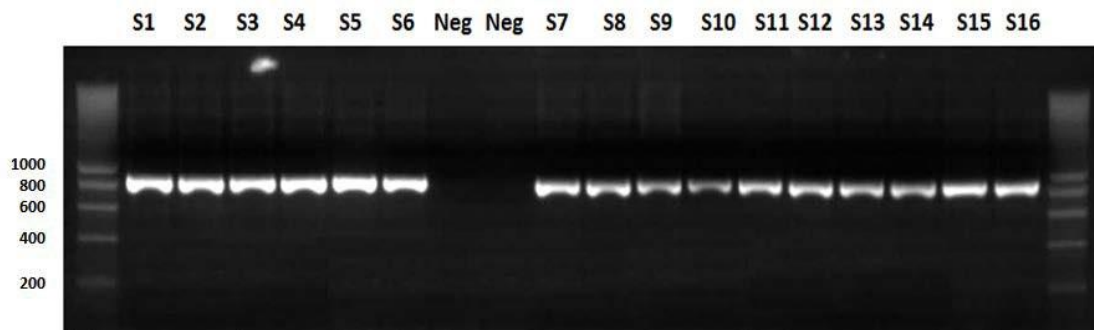

Expected size: 849 bp

#### 5.4. Sequencing

- Send 20-40 µl of N1 PCR products for sequencing in 96-wells plate using a sealed box to:

Malaria Molecular Epidemiology Unit  
Institut Pasteur in Cambodia  
5 Boulevard Monivong - PO Box 983  
Phnom Penh - Cambodia  
Tel +855 23 426 009 poste 219  
Cell-phone: +855 17 666 442  
Fax +855 23 725 606

#### 6. Quality Controls

Six *P. falciparum* strains with a known K13 allele were cultured at Institut Pasteur du Cambodge and spotted on filter paper to be used as quality controls for the K13 molecular assays: K13\_1, K13\_2, K13\_3, K13\_4, K13\_5, K13\_6.

The six K13 quality controls have to be processed at the same time as studied samples, from the extraction step (on set of 6 QC per batch of sample analysed). At least one negative control (no template control) has to be added per PCR run.

Results will be considered valid only if K13 allele from each strain match with expected results. If results are not valid, all samples have to be repeated from the DNA extraction step.

## 8. Appendix A. 3D7 sequences of PF3D7\_1343700 Kelch protein propeller domain

*P. falciparum* 3D7 protein coding gene on Pf3D7\_13\_v3 from 1,724,817 to 1,726,997 (Chromosome: 13)

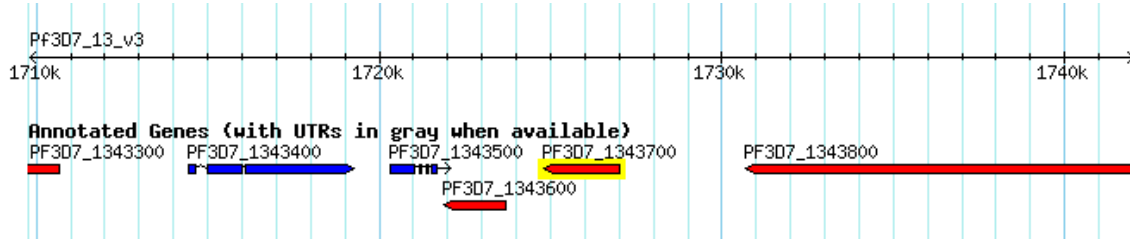

2181 bp sequences flanking candidate marker SNPs from 3D7 complete genome are given. Positions of primary primers (yellow) and secondary primer (in green) are shown.

>gi|124513603|ref|XM\_001350122.1| Plasmodium falciparum 3D7 kelch protein, putative (PF13\_0238) mRNA, complete cds

```

ATGGAAGGAGAAAAAGTAAAAACAAAAGCAAATAGTATCTCGAATTTTTCTATGACGTATGATAGGGAAT
CTGGTGGTAACAGCAATAGTGATGATAAAAAGCGGAAGTAGTAGCGAGAATGATTCTAATTCATTTATGAA
TCTAACTAGTGATAAAAATGAGAAAACGGAAAAATAATAGTTTCCTTTTAAATAATAGTAGTTATGGAAAT
GTTAAAGATAGCCTATTAGAATCCATTGATATGAGTGTATTAGATTCGAACTTTGATAGTAAAAAAGATT
TTTTACCAAGTAATTTATCAAGAACATTTAATAATATGTCTAAAGATAATATAGGAAATAAATATTTAAA
TAAATTGTTAAATAAAAAAAGATACTATTACAAATGAAAAATAAATAATTAATCATAATAATAATAAT
AATAATCTGACAGCAAATAATAACTAATAATCTTATTAATAATAATATGAATTCATCAATTATGA
ATACCAACAAAAAAGAGAATTTTTTAGATGCAGCAAATCTTATAAATGATGATTCTGGATTAAACAATTT
AAAAAATTTTCAACTGTAAATAATGTAATGATACTTATGAAAAGAAAATTATTGAAACGGAATTAAGT
GATGCTAGTGATTTTGAAAATATGGTAGGTGATTTAAGAATTACATTTATTAATTGGTTAAAAAAGACAC
AAATGAATTTTATTCGAGAAAAAGATAAATTTATTTAAAGATAAGAAAGAACTAGAAATGGAAAGAGTACG
ATTGTACAAAGAATTAGAAAACCGTAAAAATATTGAAGAACAGAAATTACATGATGAAAGAAAGAAATTA
GATATTGATATATCTAATGGTTATAAACAATAAAAAAAGAAAAAGAAGAACATAGGAAACGATTTGATG
AAGAAAGATTAAGATTTTACAAGAAATCGATAAAATTAATTAGTATTATTTAGAAAAAGAAAAATA
TTATCAAGAATATAAAAATTTTGAGAATGATAAAAAAATTTGTTGATGCAAATATTGCTACTGAACT
ATGATTGATATTAATGTTGGTGGAGCTATTTTTGAAACATCTAGACATACCTTAACACAACAAAAAGATT
CATTTATAGAGAAATTAATAAGTGAAGACATCATGTAACCAGAGATAAACAAGGAAGAATATTCTTAGA
TAGGGATAGTGAGTTATTTAGAATTATACTTAACTTCTTAAGAAATCCGTTAACTATACCCATACCAAAA
GATTTAAGTGAAAGTGAAGCCTTGTTGAAAGAAGCAGAATTTTATGGTATTAAATTTTTACCATTCCCAT
TAGTATTTTGTATAGGTGGATTTGATGGTGTAGAATATTTAAATTCGATGGAATTATTAGATATTAGTCA
ACAATGCTGGCGTATGTGTACACCTATGTCTACCAAAAAAGCTTATTTTGGAAAGTGTGATTGAATAAT
TTCTTATACGTTTTTGGTGGTAATAACTATGATTATAAGGCTTTATTTGAAACTGAGGTGTATGATCGTT
TAAGAGATGTATGGTATGTTTCAAGTAATTTAAATATACCTAGAAGAAATAATTGTGGTGTACGTCAAA
TGGTAGAATTTATTGTATTGGGGGATATGATGGCTCTTCTATTATACCGAATGTAGAAGCATATGATCAT
CGTATGAAAGCATGGGTAGAGGTGGCACCTTTGAATACCCCTAGATCATCAGCTATGTGTGTTGCTTTTG
ATAATAAAATTTATGTCATTGGTGAACATAATGGTGAGAGATTAATTTCTATTGAAGTATATGAAGAAAA
AATGAATAAATGGGAACAATTTCCATATGCCTTATTAGAAGCTAGAAGTTCAGGAGCAGCTTTTAATTAC
CTTAATCAAATATATGTTGTTGGAGGTATTGATAATGAACATAACATATTAGATTCCGTTGAACAATATC
AACCATTTAATAAAAAGATGGCAATTTCTAAATGGTGTACCAGAGAAAAAATGAATTTTGGAGCTGCCAC
ATTGTCAGATTCTTATATAATTACAGGAGGAGAAAAATGGCGAAGTCTAAATTCATGTCATTTCTTTTCA
CCAGATACAATGAATGGCAGCTTGGCCCATCTTTATTAGTTCCAGATTTGGTCACTCCGTTTTAATAG
CAAATATATA
    
```

**Table S2.** Sequence of primers and PCR conditions used to amplify PF3D7\_1337500 (1509589...1519593, K13\_151) and PF3D7\_1339700 (1590510...1596320, K13\_159) genes in *Plasmodium falciparum* isolates harboring a K13 mutant allele, KARMA study 2014.

| Target gene                | PCR       | Primer name        | Sequence (5'-3')          | Hybridization T° | Size of PCR product |
|----------------------------|-----------|--------------------|---------------------------|------------------|---------------------|
| PF3D7_1337500<br>(K13_151) | Primary   | PfK13_151_PCR_F    | TTTTCGTTTGTCTACTCATATCAT  | 54°C             | 994 bp              |
|                            |           | PfK13_151_PCR_R    | TAATCTCTCAAATGAATCAAAAA   |                  |                     |
|                            | Secondary | PfK13_151_Nested_F | ACCATAAGGAAATTGGTTCATCA   | 60°C             | 866 bp              |
|                            |           | PfK13_151_Nested_R | TCGAGAGCATAAATGAGCAATC    |                  |                     |
| PF3D7_1339700<br>(K13_159) | Primary   | PfK13_159_PCR_F    | TTGTCATCTTGATCATTTGTTG    | 57°C             | 1287 bp             |
|                            |           | PfK13_159_PCR_R    | AACTCTTTGTGAGGAAAAGAAA    |                  |                     |
|                            | Secondary | PfK13_159_Nested_F | CATATTTTCATTTTCAATGTGATGA | 60°C             | 866 bp              |
|                            |           | PfK13_159_Nested_R | GAATCTTACGAGAGACGACTGGA   |                  |                     |

Primary PCR amplifications were performed in 25 µL reaction mixture containing 0.5 µL DNA, 0.25 µM each primer, 200 µM each dNTP, 2.5 mM MgCl<sub>2</sub> and 1.25 U HotFirePol DNA Polymerase® (Solis Biodyne®, Tartu, Estonia). Secondary, internal amplifications were done in 55 µL reaction buffer with 5 µL of PCR products, 0.5 µM each primer, 200 µM each dNTP, 2.5 mM MgCl<sub>2</sub> and 2.5 U HotFirePol DNA polymerase. PCR amplifications were performed under the following conditions: for PF3D7\_1337500 (K13\_151) primary amplification, heating at 95°C for 15 min, followed by 30 cycles of heating at 95°C for 30 s, 54°C for 60 s, 72°C for 60 s and a final extension at 72°C for 10 min; secondary reaction: heating at 95°C for 15 min, followed by 40 cycles of heating at 95°C for 20 s, 60°C for 60 s, 72°C for 60 s and a final extension at 72°C for 10 min and for PF3D7\_1339700 (K13\_159) primary amplification, heating at 95°C for 15 min, followed by 30 cycles of heating at 95°C for 30 s, 57°C for 90 s, 72°C for 120 s and a final extension at 72°C for 10 min; secondary reaction: heating at 95°C for 15 min, followed by 40 cycles of heating at 95°C for 30 s, 60°C for 90 s, 72°C for 120 s and a final extension at 72°C for 10 min.



**Table S3.** Number of samples collected from residents and travelers, day3 positivity rates and proportion of sequences with a non-synonymous mutation of K13-propeller domain by continent, region and country, KARMA study 2014.

| Continent    | Region          | Country                      | No. collection sites (for residents only) | No. samples           |                        | Travelers | Total | No. interpretable sequences | Proportion of sequences with non-synonymous propeller mutations (95%CI) <sup>1</sup> | No. samples with D3 clinical phenotype | D3 positivity rate <sup>2</sup> (95%CI) following artesunate monotherapy or ACT treatment <sup>3</sup> | Proportion of D3 positive case with K13 mutations (95%CI) <sup>4</sup> |
|--------------|-----------------|------------------------------|-------------------------------------------|-----------------------|------------------------|-----------|-------|-----------------------------|--------------------------------------------------------------------------------------|----------------------------------------|--------------------------------------------------------------------------------------------------------|------------------------------------------------------------------------|
|              |                 |                              |                                           | Residents symptomatic | Residents asymptomatic |           |       |                             |                                                                                      |                                        |                                                                                                        |                                                                        |
| Africa       | Central Africa  | Cameroon                     | 2                                         | 702                   | 140                    | 69        | 911   | 901                         | 1.2% (0.6-2.2%)                                                                      | 50                                     | 0% (0-7.4%)                                                                                            | NA                                                                     |
|              |                 | Central African Republic     | 4                                         | 400                   |                        | 69        | 469   | 423                         | 4.5% (2.7-7.0%)                                                                      | 72                                     | 0% (0-5.1%)                                                                                            | NA                                                                     |
|              |                 | Chad                         | 0                                         | 0                     |                        | 33        | 33    | 33                          | 3.0% (0.1-16.9%)                                                                     | 5                                      | 0% (0-74%)                                                                                             | NA                                                                     |
|              |                 | Congo                        | 0                                         | 0                     |                        | 72        | 72    | 71                          | 0% (0-5.2%)                                                                          | 11                                     | 0% (0-33.5%)                                                                                           | NA                                                                     |
|              |                 | Democratic Republic of Congo | 5                                         | 1262                  |                        | 26        | 1288  | 1230                        | 1.1% (1.1-1.2%)                                                                      | 3                                      | 0% (0-100%)                                                                                            | NA                                                                     |
|              |                 | Equatorial Guinea            | 0                                         | 0                     |                        | 7         | 7     | 7                           | 0% (0-52.7%)                                                                         | 0                                      | NA                                                                                                     | NA                                                                     |
|              |                 | Gabon                        | 4                                         | 138                   | 314                    | 44        | 496   | 407                         | 1.0% (0.3-2.5%)                                                                      | 2                                      | 0% (0-100%)                                                                                            | NA                                                                     |
|              | East Africa     | Burundi                      | 0                                         | 0                     |                        | 1         | 1     | 1                           | 0% (0-100%)                                                                          | 0                                      | NA                                                                                                     | NA                                                                     |
|              |                 | Ethiopia                     | 1                                         | 146                   |                        | 0         | 146   | 126                         | 0% (0-2.9%)                                                                          | 0                                      | NA                                                                                                     | NA                                                                     |
|              |                 | Kenya                        | 1                                         | 191                   |                        | 7         | 198   | 184                         | 3.3% (1.2-7.1%)                                                                      | 0                                      | NA                                                                                                     | NA                                                                     |
|              |                 | Rwanda                       | 4                                         | 293                   |                        | 0         | 293   | 292                         | 1.4% (0.4-3.5%)                                                                      | 287                                    | 0.3% (0-1.9%)                                                                                          | 0%                                                                     |
|              |                 | Somalia                      | 2                                         | 186                   |                        | 0         | 186   | 186                         | 0% (0-2.0%)                                                                          | 186                                    | 0% (0-2.0%)                                                                                            | NA                                                                     |
|              |                 | Sudan                        | 0                                         | 0                     |                        | 5         | 5     | 5                           | 0% (0-74%)                                                                           | 1                                      | NA                                                                                                     | NA                                                                     |
|              |                 | South Sudan                  | 0                                         | 0                     |                        | 1         | 1     | 1                           | 0% (0-100%)                                                                          | 0                                      | NA                                                                                                     | NA                                                                     |
|              |                 | Tanzania                     | 8                                         | 232                   |                        | 4         | 236   | 236                         | 0% (0-1.5%)                                                                          | 0                                      | NA                                                                                                     | NA                                                                     |
|              | Uganda          | 1                            | 88                                        | 191                   | 15                     | 294       | 283   | 1.1% (0.2-3.1%)             | 1                                                                                    | 0% (0-100%)                            | NA                                                                                                     |                                                                        |
|              | Southern Africa | Angola                       | 2                                         | 31                    |                        | 3         | 34    | 34                          | 0% (0-10.8%)                                                                         | 0                                      | NA                                                                                                     | NA                                                                     |
|              |                 | Malawi                       | 0                                         | 0                     |                        | 13        | 13    | 13                          | 0% (0-28.4%)                                                                         | 0                                      | NA                                                                                                     | NA                                                                     |
|              |                 | Mozambique                   | 0                                         | 0                     |                        | 5         | 5     | 5                           | 0% (0-74%)                                                                           | 0                                      | NA                                                                                                     | NA                                                                     |
|              |                 | South Africa                 | 0                                         | 0                     |                        | 2         | 2     | 2                           | 0% (0-100%)                                                                          | 0                                      | NA                                                                                                     | NA                                                                     |
|              |                 | Zambia                       | 1                                         | 298                   |                        | 6         | 304   | 283                         | 4.6% (2.4-7.8%)                                                                      | 277                                    | 0% (0-1.3%)                                                                                            | NA                                                                     |
|              |                 | Zimbabwe                     | 0                                         | 0                     |                        | 7         | 7     | 7                           | 0% (0-53%)                                                                           | 0                                      | NA                                                                                                     | NA                                                                     |
|              | West Africa     | Benin                        | 1                                         | 232                   |                        | 33        | 265   | 234                         | 0.9% (0.1-3.1%)                                                                      | 11                                     | 0% (0-33.5%)                                                                                           | NA                                                                     |
| Burkina Faso |                 | 5                            | 551                                       |                       | 61                     | 612       | 589   | 0.3% (0.1-1.2%)             | 4                                                                                    | 0% (0-92%)                             | NA                                                                                                     |                                                                        |
| Gambia       |                 | 0                            | 0                                         |                       | 12                     | 12        | 12    | 8.3% (0.2-46%)              | 0                                                                                    | NA                                     | NA                                                                                                     |                                                                        |
| Ghana        |                 | 0                            | 0                                         |                       | 37                     | 37        | 37    | 0% (0-10%)                  | 1                                                                                    | 0% (0-100%)                            | NA                                                                                                     |                                                                        |
| Guinea       |                 | 0                            | 0                                         |                       | 87                     | 87        | 86    | 3.5% (0.7-10.1%)            | 11                                                                                   | 0% (0-33.5%)                           | NA                                                                                                     |                                                                        |

|               |                |                  |            |              |             |            |              |      |                    |             |                    |               |
|---------------|----------------|------------------|------------|--------------|-------------|------------|--------------|------|--------------------|-------------|--------------------|---------------|
|               |                | Guinea Bissau    | 0          | 0            |             | 3          | 3            | 3    | 0% (0-100%)        | 1           | 0% (0-100%)        | NA            |
|               |                | Ivory Coast      | 7          | 1110         |             | 47         | 1157         | 1083 | 0.9% (0.4-1.7%)    | 71          | 0% (0-5.2%)        | NA            |
|               |                | Liberia          | 0          | 0            |             | 1          | 1            | 1    | 0% (0-100%)        | 0           | NA                 | NA            |
|               |                | Mali             | 2          | 458          |             | 9          | 467          | 465  | 0.4% (0.1-1.5%)    | 40          | 0% (0-9.2%)        | NA            |
|               |                | Mauritania       | 0          | 0            |             | 1          | 1            | 1    | 0% (0-100%)        | 0           | NA                 | NA            |
|               |                | Niger            | 2          | 766          |             | 10         | 776          | 521  | 1.3% (0.5-2.8%)    | 2           | 0% (0-100%)        | NA            |
|               |                | Nigeria          | 1          | 161          | 41          | 97         | 299          | 273  | 1.1% (0.2-3.2%)    | 1           | 0% (0-100%)        | NA            |
|               |                | Senegal          | 2          | 246          |             | 67         | 313          | 246  | 0% (0-1.5%)        | 7           | 0% (0-52.3%)       | NA            |
|               |                | Sierra Leone     | 0          | 0            |             | 37         | 37           | 37   | 0% (0-10%)         | 1           | 0% (0-100%)        | NA            |
|               |                | Togo             | 3          | 476          |             | 32         | 508          | 508  | 1.8% (0.8-3.4%)    | 485         | 1.6% (0.7-3.2%)    | 0%            |
|               | Indian Ocean   | Comoros          | 4          | 297          | 39          | 18         | 354          | 352  | 3.7% (2.0-6.3%)    | 2           | 0% (0-100%)        | NA            |
|               |                | Madagascar       | 23         | 59           | 216         | 2          | 277          | 256  | 0.4% (0.1-2.1%)    | 1           | 0% (0-100%)        | NA            |
|               | Central Asia   | Afghanistan      | 1          | 62           |             | 0          | 62           | 62   | 1.6% (0.1-9.0%)    | 0           | NA                 | NA            |
|               |                | Iran             | 4          | 78           |             | 0          | 78           | 76   | 2.6% (0.1-9.5%)    | 0           | NA                 | NA            |
|               | East Asia      | China            | 4          | 216          |             | 0          | 216          | 215  | 25.6% (19.3-33.3%) | 148         | 10.1% (5.7-16.7%)  | 93% (51-100%) |
|               |                | Myanmar          | 4          | 347          |             | 0          | 347          | 343  | 46.9% (46.2-47.7%) | 189         | 15.3% (10.3-22.0%) | 72% (45-100%) |
|               | South Asia     | Bangladesh       | 9          | 333          |             | 0          | 333          | 318  | 0.9% (0.2-2.7%)    | 61          | 0% (0-6.1%)        | NA            |
|               |                | Nepal            | 4          | 24           |             | 0          | 24           | 22   | 0% (0-16.8%)       | 18          | 0% (0-20.5%)       | NA            |
|               | Southeast Asia | Cambodia         | 12         | 748          | 134         | 0          | 882          | 882  | 66.4% (61.2-72.0%) | 171         | 22.2% (15.7-30.5%) | 90% (62-100%) |
|               |                | Indonesia        | 1          | 110          |             | 0          | 110          | 106  | 0.9% (0.1-5.2%)    | 0           | NA                 | NA            |
|               |                | Lao PDR          | 3          | 82           | 40          | 0          | 122          | 120  | 20.0% (13.0-30.0%) | 48          | 0% (0-7.7%)        | NA            |
|               |                | Philippines      | 2          | 120          |             | 0          | 120          | 99   | 0% (0-3.7%)        | 66          | 0% (0-5.6%)        | NA            |
|               |                | Thailand         | 4          | 150          | 57          | 0          | 207          | 205  | 26.3% (19.8-34.4%) | 0           | NA                 | NA            |
|               |                | Vietnam          | 4          | 177          |             | 0          | 177          | 175  | 39.4% (31.0-50.0%) | 175         | 16.0% (10.6-23.1%) | 79% (49-100%) |
| Oceania       | Oceania        | Papua New Guinea | 12         | 13           | 42          | 1          | 56           | 43   | 0% (0-8.6%)        | 1           | 0% (0-100%)        | NA            |
|               |                | Solomon Islands  | 2          | 44           |             | 0          | 44           | 43   | 2.3% (0.1-12.9%)   | 38          | 5.3% (0.1-19.0%)   | 0%            |
|               |                | Brazil           | 1          | 219          | 18          | 0          | 237          | 237  | 0.4% (0.1-2.3%)    | 2           | 0% (0-100%)        | NA            |
|               |                | Colombia         | 3          | 535          |             | 0          | 535          | 523  | 0% (0-0.7%)        | 0           | NA                 | NA            |
| South America | South America  | Ecuador          | 0          | 0            |             | 1          | 1            | 1    | 0% (0-100%)        | 0           | NA                 | NA            |
|               |                | French Guiana    | 7          | 198          |             | 5          | 203          | 183  | 0% (0-2.0%)        | 0           | NA                 | NA            |
|               |                | Peru             | 1          | 75           |             | 0          | 75           | 69   | 0% (0-5.3%)        | 0           | NA                 | NA            |
|               |                | Venezuela        | 0          | 0            |             | 1          | 1            | 1    | 0% (0-100%)        | 0           | NA                 | NA            |
|               |                |                  | <b>163</b> | <b>11854</b> | <b>1232</b> | <b>951</b> | <b>14037</b> |      |                    | <b>2450</b> |                    |               |

NA: Not applicable; <sup>1</sup> 95% CI (95% confidence interval) were calculated with the Wilson Test; <sup>2</sup> D3 (Day 3) positivity rate is the proportion of patients who are parasitemic on day 3 following 7-day artesunate monotherapy or standard 3-day ACT treatment. According to the World Health Organization (<http://www.who.int/malaria/publications/atoz/arupdate042012.pdf>), this parameter is currently the best available indicator used in routine monitoring to measure *P. falciparum* sensitivity to artemisinins; <sup>3</sup> ACT treatments administered were artemether/lumefantrine, artesunate/amodiaquine, artesunate/sulfadoxine-pyrimethamine or dihydroartemisinin/piperaquine; <sup>4</sup> Proportion of D3 positive cases with a K13 mutation.

K13 genotypes of the 121 D3 positive cases were as follows: Rwanda: wild-type (N=1); Togo: wild-type (N=8); China: wild-type (N=1), C469Y (N=1), F446I (N=7), N458Y (N=1), N537D (N=1), P553L (N=2), P574L (N=2); Myanmar: wild-type (N=8), F446I (N=18), P574L (N=2), R539T (N=1); Cambodia: wild-type (N=4), C580Y (N=33), R539T (N=1); Vietnam: wild-type (N=6), C580Y (N=10), I543T (N=3), N458Y (N=1), P553L (N=8); Solomon Islands: wild-type (N=2).

**Table S4.** List of the samples tested for sequencing of the K13 gene propeller domain including detailed information on the partner institution, samples collected (number, location, individual clinical status, parasitemia, age and gender) and KARMA option chosen, KARMA study 2014.

| Continent | Region         | Country                  | Partner Institution                                                                                                              | No. samples | Location of sample collection | Year of collection | Traveler or resident | Clinical status | Age (range, year) | Male (%) | Completeness of demographic data for the country | Parasitemia (P/ $\mu$ L, range) | Partner's option* |
|-----------|----------------|--------------------------|----------------------------------------------------------------------------------------------------------------------------------|-------------|-------------------------------|--------------------|----------------------|-----------------|-------------------|----------|--------------------------------------------------|---------------------------------|-------------------|
| AFRICA    | Central Africa | Cameroon                 | Parasitologie et mycologie, Centre Hospitalier Universitaire, Toulouse, France                                                   | 66          | Yaounde                       | 2012               | Resident             | Symptomatic     | 0.7-17            | 56%      |                                                  | NA                              | 2                 |
| AFRICA    | Central Africa | Cameroon                 | Parasitologie et mycologie, Centre Hospitalier Universitaire, Toulouse, France                                                   | 41          | Yaounde                       | 2012               | Resident             | Asymptomatic    | NA                | NA       |                                                  | NA                              | 2                 |
| AFRICA    | Central Africa | Cameroon                 | Parasitologie et mycologie, Centre Hospitalier Universitaire, Toulouse, France                                                   | 311         | Yaounde                       | 2013               | Resident             | Symptomatic     | 0.4-15            | 47%      |                                                  | NA                              | 2                 |
| AFRICA    | Central Africa | Cameroon                 | Parasitologie et mycologie, Centre Hospitalier Universitaire, Toulouse, France                                                   | 100         | Yaounde                       | 2013               | Resident             | Asymptomatic    | 6-12              | NA       |                                                  | NA                              | 2                 |
| AFRICA    | Central Africa | Cameroon                 | Parasitologie et mycologie, Centre Hospitalier Universitaire, Toulouse, France                                                   | 75          | Douala                        | 2013               | Resident             | Symptomatic     | NA                | NA       | 50%                                              | NA                              | 2                 |
| AFRICA    | Central Africa | Cameroon                 | Parasitologie et mycologie, Hôpital Bichat Claude-Bernard, Paris, France                                                         | 160         | NA                            | 2013               | Resident             | Symptomatic     | 1-76              | NA       |                                                  | NA                              | 2                 |
| AFRICA    | Central Africa | Cameroon                 | Parasitologie et mycologie, Hôpital Bichat Claude-Bernard, Paris, France                                                         | 89          | NA                            | 2014               | Resident             | Symptomatic     | 5-69              | 59%      |                                                  | NA                              | 2                 |
| AFRICA    | Central Africa | Cameroon                 | Centre National de Référence du Paludisme, Hôpital Bichat Claude-Bernard, Paris, France                                          | 26          | NA                            | 2013               | Traveler             | Symptomatic     | NA                | NA       |                                                  | 50-500,000                      | 2                 |
| AFRICA    | Central Africa | Cameroon                 | Centre National de Référence du Paludisme, Hôpital Bichat Claude-Bernard, Paris, France/Malaria Reference Laboratory, London, UK | 43          | NA                            | 2014               | Traveler             | Symptomatic     | NA                | NA       |                                                  | 50-300,000                      | 2                 |
| AFRICA    | Central Africa | Central African Republic | Centre National de Référence du Paludisme, Hôpital Bichat Claude-Bernard, Paris, France                                          | 39          | NA                            | 2013               | Traveler             | Symptomatic     | 3-70              | NA       |                                                  | NA                              | 2                 |
| AFRICA    | Central Africa | Central African Republic | Centre National de Référence du Paludisme, Hôpital Bichat Claude-Bernard, Paris, France                                          | 30          | NA                            | 2014               | Traveler             | Symptomatic     | 1-68              | NA       |                                                  | NA                              | 2                 |
| AFRICA    | Central Africa | Central African Republic | Institut Pasteur de Bangui, Bangui, Central African Republic                                                                     | 47          | Bangassou                     | 2009               | Resident             | Symptomatic     | NA                | NA       |                                                  | NA                              | 1                 |
| AFRICA    | Central Africa | Central African Republic | Institut Pasteur de Bangui, Bangui, Central African Republic                                                                     | 78          | Bangui                        | 2009               | Resident             | Symptomatic     | NA                | NA       | 5%                                               | NA                              | 1                 |
| AFRICA    | Central Africa | Central African Republic | Institut Pasteur de Bangui, Bangui, Central African Republic                                                                     | 131         | Bangui                        | 2011               | Resident             | Symptomatic     | NA                | NA       |                                                  | NA                              | 1                 |
| AFRICA    | Central Africa | Central African Republic | Institut Pasteur de Bangui, Bangui, Central African Republic                                                                     | 53          | Bayanga                       | 2009               | Resident             | Symptomatic     | NA                | NA       |                                                  | NA                              | 1                 |
| AFRICA    | Central Africa | Central African Republic | Institut Pasteur de Bangui, Bangui, Central African Republic                                                                     | 91          | Bria/Bouar                    | 2009               | Resident             | Symptomatic     | NA                | NA       |                                                  | NA                              | 1                 |
| AFRICA    | Central Africa | Chad                     | Centre National de Référence du Paludisme, Hôpital Bichat Claude-Bernard, Paris, France                                          | 30          | NA                            | 2013               | Traveler             | Symptomatic     | 5-64              | NA       |                                                  | NA                              | 2                 |
| AFRICA    | Central Africa | Chad                     | Centre National de Référence du Paludisme, Hôpital Bichat Claude-Bernard, Paris, France                                          | 3           | NA                            | 2014               | Traveler             | Symptomatic     | 33-43             | NA       | 0%                                               | NA                              | 2                 |

|        |                |                              |                                                                                                                                  |     |           |      |          |              |        |       |             |    |     |
|--------|----------------|------------------------------|----------------------------------------------------------------------------------------------------------------------------------|-----|-----------|------|----------|--------------|--------|-------|-------------|----|-----|
| AFRICA | Central Africa | Congo                        | Centre National de Référence du Paludisme, Hôpital Bichat Claude-Bernard, Paris, France                                          | 38  | NA        | 2013 | Traveler | Symptomatic  | 2-68   | NA    | NA          | 2  |     |
| AFRICA | Central Africa | Congo                        | Centre National de Référence du Paludisme, Hôpital Bichat Claude-Bernard, Paris, France/Malaria Reference Laboratory, London, UK | 34  | NA        | 2014 | Traveler | Symptomatic  | 5-62   | NA    | 24%         | NA | 2/3 |
| AFRICA | Central Africa | Democratic Republic of Congo | Centre National de Référence du Paludisme, Hôpital Bichat Claude-Bernard, Paris, France                                          | 17  | NA        | 2013 | Traveler | Symptomatic  | 4-59   | NA    | NA          | 2  |     |
| AFRICA | Central Africa | Democratic Republic of Congo | Centre National de Référence du Paludisme, Hôpital Bichat Claude-Bernard, Paris, France                                          | 9   | NA        | 2014 | Traveler | Symptomatic  | 20-58  | 62.5% | NA          | 2  |     |
| AFRICA | Central Africa | Democratic Republic of Congo | University of Kinshasa, Kinshasa, Democratic Republic of Congo                                                                   | 673 | Kinshasa  | 2013 | Resident | Symptomatic  | 0.3-86 | 49%   | 594-513,382 | 1  |     |
| AFRICA | Central Africa | Democratic Republic of Congo | University of Kinshasa, Kinshasa, Democratic Republic of Congo                                                                   | 251 | Kinshasa  | 2014 | Resident | Symptomatic  | 0.1-64 | 49%   | 40-572,394  | 1  |     |
| AFRICA | Central Africa | Democratic Republic of Congo | WHO, Global Malaria Programme, Geneva, Switzerland                                                                               | 179 | Kingasani | 2013 | Resident | Symptomatic  | NA     | NA    | 71%         | NA | 3   |
| AFRICA | Central Africa | Democratic Republic of Congo | WHO, Global Malaria Programme, Geneva, Switzerland                                                                               | 54  | Bolenge   | 2013 | Resident | Symptomatic  | NA     | NA    | NA          | 3  |     |
| AFRICA | Central Africa | Democratic Republic of Congo | WHO, Global Malaria Programme, Geneva, Switzerland                                                                               | 29  | Kapolowe  | 2013 | Resident | Symptomatic  | NA     | NA    | NA          | 3  |     |
| AFRICA | Central Africa | Democratic Republic of Congo | WHO, Global Malaria Programme, Geneva, Switzerland                                                                               | 76  | Katana    | 2013 | Resident | Symptomatic  | NA     | NA    | NA          | 3  |     |
| AFRICA | Central Africa | Equatorial Guinea            | Centre National de Référence du Paludisme, Hôpital Bichat Claude-Bernard, Paris, France                                          | 6   | NA        | 2013 | Traveler | Symptomatic  | 24-60  | NA    | 0%          | NA | 2   |
| AFRICA | Central Africa | Equatorial Guinea            | Malaria Reference Laboratory, London, UK                                                                                         | 1   | NA        | 2014 | Traveler | Symptomatic  | NA     | NA    | NA          | 3  |     |
| AFRICA | Central Africa | Gabon                        | Centre de Recherche Médicales de Lambaréné, Libreville, Gabon                                                                    | 266 | Lambarene | 2012 | Resident | Asymptomatic | NA     | NA    | NA          | 1  |     |
| AFRICA | Central Africa | Gabon                        | Centre de Recherche Médicales de Lambaréné, Libreville, Gabon                                                                    | 84  | Lambarene | 2013 | Resident | Asymptomatic | NA     | NA    | NA          | 1  |     |
| AFRICA | Central Africa | Gabon                        | Centre de Recherche Médicales de Lambaréné, Libreville, Gabon                                                                    | 10  | Lambarene | 2014 | Resident | Asymptomatic | NA     | NA    | NA          | 1  |     |
| AFRICA | Central Africa | Gabon                        | Centre de Recherche Médicales de Lambaréné, Libreville, Gabon                                                                    | 5   | Bindo     | 2012 | Resident | Asymptomatic | NA     | NA    | 15%         | NA | 1   |
| AFRICA | Central Africa | Gabon                        | Centre de Recherche Médicales de Lambaréné, Libreville, Gabon                                                                    | 23  | Makouké   | 2012 | Resident | Asymptomatic | NA     | NA    | NA          | 1  |     |
| AFRICA | Central Africa | Gabon                        | Centre de Recherche Médicales de Lambaréné, Libreville, Gabon                                                                    | 8   | Makouké   | 2013 | Resident | Asymptomatic | NA     | NA    | NA          | 1  |     |
| AFRICA | Central Africa | Gabon                        | Centre International de Recherches Médicales de Franceville, Franceville, Gabon                                                  | 56  | NA        | 2013 | Resident | Symptomatic  | NA     | NA    | 70-161,480  | 1  |     |

|        |                |             |                                                                                                                                  |     |           |      |          |              |       |       |      |               |   |
|--------|----------------|-------------|----------------------------------------------------------------------------------------------------------------------------------|-----|-----------|------|----------|--------------|-------|-------|------|---------------|---|
| AFRICA | Central Africa | Gabon       | Centre National de Référence du Paludisme, Hôpital Bichat Claude-Bernard, Paris, France                                          | 34  | NA        | 2013 | Traveler | Symptomatic  | 9-73  | NA    |      | NA            | 2 |
| AFRICA | Central Africa | Gabon       | Centre National de Référence du Paludisme, Hôpital Bichat Claude-Bernard, Paris, France/Malaria Reference Laboratory, London, UK | 10  | NA        | 2014 | Traveler | Symptomatic  | NA    | NA    |      | NA            | 2 |
| AFRICA | East Africa    | Burundi     | Centre National de Référence du Paludisme, Hôpital Bichat Claude-Bernard, Paris, France                                          | 1   | NA        | 2013 | Traveler | Symptomatic  | NA    | NA    | 0%   | NA            | 2 |
| AFRICA | East Africa    | Ethiopia    | Medical University of Vienna, Vienna, Austria                                                                                    | 146 | NA        | 2012 | Resident | NA           | NA    | NA    | 0%   | NA            | 2 |
| AFRICA | East Africa    | Kenya       | Epicentre Research Center, Mbarara, Uganda                                                                                       | 46  | Ahero     | 2011 | Resident | Symptomatic  | NA    | NA    |      | NA            | 1 |
| AFRICA | East Africa    | Kenya       | Epicentre Research Center, Mbarara, Uganda                                                                                       | 124 | Ahero     | 2012 | Resident | Symptomatic  | NA    | NA    | 0%   | NA            | 1 |
| AFRICA | East Africa    | Kenya       | Epicentre Research Center, Mbarara, Uganda                                                                                       | 21  | Ahero     | 2013 | Resident | Symptomatic  | NA    | NA    |      | NA            | 1 |
| AFRICA | East Africa    | Kenya       | Malaria Reference Laboratory, London, UK                                                                                         | 7   | NA        | 2014 | Traveler | Symptomatic  | NA    | NA    |      | NA            | 3 |
| AFRICA | East Africa    | Rwanda      | Rwanda BioMedical Center, Kigali, Rwanda                                                                                         | 20  | Bugarama  | 2012 | Resident | Symptomatic  | 1-5   | 50%   |      | 3,800-92,600  | 2 |
| AFRICA | East Africa    | Rwanda      | Rwanda BioMedical Center, Kigali, Rwanda                                                                                         | 48  | Bugarama  | 2013 | Resident | Symptomatic  | 1-5   | 54.1% |      | 1,520-88,600  | 2 |
| AFRICA | East Africa    | Rwanda      | Rwanda BioMedical Center, Kigali, Rwanda                                                                                         | 26  | Kibilizi  | 2012 | Resident | Symptomatic  | 15-58 | 61.5% |      | 1,200-98,960  | 2 |
| AFRICA | East Africa    | Rwanda      | Rwanda BioMedical Center, Kigali, Rwanda                                                                                         | 52  | Kibilizi  | 2013 | Resident | Symptomatic  | 15-59 | 53.8% |      | 1,240-91,600  | 2 |
| AFRICA | East Africa    | Rwanda      | Rwanda BioMedical Center, Kigali, Rwanda                                                                                         | 12  | Kibilizi  | 2014 | Resident | Symptomatic  | 15-56 | 50%   | 100% | 1,160-91,800  | 2 |
| AFRICA | East Africa    | Rwanda      | Rwanda BioMedical Center, Kigali, Rwanda                                                                                         | 22  | Nyarurema | 2012 | Resident | Symptomatic  | 1-5   | 59%   |      | 2,720-70,240  | 2 |
| AFRICA | East Africa    | Rwanda      | Rwanda BioMedical Center, Kigali, Rwanda                                                                                         | 38  | Nyarurema | 2013 | Resident | Symptomatic  | 1-5   | 52.6% |      | 1,200-688,800 | 2 |
| AFRICA | East Africa    | Rwanda      | Rwanda BioMedical Center, Kigali, Rwanda                                                                                         | 25  | Rukara    | 2012 | Resident | Symptomatic  | 11-59 | 68%   |      | 2,280-58,160  | 2 |
| AFRICA | East Africa    | Rwanda      | Rwanda BioMedical Center, Kigali, Rwanda                                                                                         | 50  | Rukara    | 2013 | Resident | Symptomatic  | 10-55 | 54%   |      | 1,080-94,160  | 2 |
| AFRICA | East Africa    | Somalia     | WHO, Global Malaria Programme, Geneva, Switzerland                                                                               | 94  | Janale    | 2013 | Resident | Symptomatic  | 1-58  | 51%   | 100% | 370-45,935    | 3 |
| AFRICA | East Africa    | Somalia     | WHO, Global Malaria Programme, Geneva, Switzerland                                                                               | 92  | Jowhar    | 2013 | Resident | Symptomatic  | 2-36  | 62%   |      | 1,171-162,000 | 3 |
| AFRICA | East Africa    | Sudan       | Centre National de Référence du Paludisme, Hôpital Bichat Claude-Bernard, Paris, France                                          | 2   | NA        | 2013 | Traveler | Symptomatic  | 42-47 | NA    | 0%   | NA            | 2 |
| AFRICA | East Africa    | Sudan       | Malaria Reference Laboratory, London, UK                                                                                         | 3   | NA        | 2014 | Traveler | Symptomatic  | NA    | NA    |      | NA            | 3 |
| AFRICA | East Africa    | South Sudan | Malaria Reference Laboratory, London, UK                                                                                         | 1   | NA        | 2014 | Traveler | Symptomatic  | NA    | NA    | 0%   | NA            | 3 |
| AFRICA | East Africa    | Tanzania    | Malaria Reference Laboratory, London, UK                                                                                         | 4   | NA        | 2014 | Traveler | Symptomatic  | NA    | NA    |      | NA            | 3 |
| AFRICA | East Africa    | Tanzania    | WHO, Global Malaria Programme, Geneva, Switzerland                                                                               | 232 | NA        | 2014 | Resident | Symptomatic  | NA    | NA    | 0%   | NA            | 3 |
| AFRICA | East Africa    | Uganda      | Epicentre Research Center, Mbarara, Uganda                                                                                       | 201 | Mbarara   | 2010 | Resident | Asymptomatic | NA    | NA    |      | 1,024-247,078 | 2 |
| AFRICA | East Africa    | Uganda      | Epicentre Research Center, Mbarara, Uganda                                                                                       | 7   | Mbarara   | 2011 | Resident | Symptomatic  | NA    | 43%   |      | 95-581,556    | 2 |

|        |              |            |                                                                                         |     |               |      |          |              |        |       |     |               |   |
|--------|--------------|------------|-----------------------------------------------------------------------------------------|-----|---------------|------|----------|--------------|--------|-------|-----|---------------|---|
| AFRICA | East Africa  | Uganda     | Epicentre Research Center, Mbarara, Uganda                                              | 35  | Mbarara       | 2012 | Resident | Symptomatic  | NA     | 57.1% | 27% | 56-472,431    | 2 |
| AFRICA | East Africa  | Uganda     | Epicentre Research Center, Mbarara, Uganda                                              | 36  | Mbarara       | 2013 | Resident | Symptomatic  | NA     | 57.1% |     | 39-203,005    | 2 |
| AFRICA | East Africa  | Uganda     | Centre National de Référence du Paludisme, Hôpital Bichat Claude-Bernard, Paris, France | 3   | NA            | 2013 | Traveler | Symptomatic  | 36-39  | NA    |     | NA            | 2 |
| AFRICA | East Africa  | Uganda     | Malaria Reference Laboratory, London, UK                                                | 12  | NA            | 2014 | Traveler | Symptomatic  | NA     | NA    |     | NA            | 3 |
| AFRICA | Indian Ocean | Comoros    | Centre National de Référence du Paludisme, Hôpital Bichat Claude-Bernard, Paris, France | 17  | NA            | 2013 | Traveler | Symptomatic  | 18-49  | NA    |     | NA            | 2 |
| AFRICA | Indian Ocean | Comoros    | Centre National de Référence du Paludisme, Hôpital Bichat Claude-Bernard, Paris, France | 1   | NA            | 2014 | Traveler | Symptomatic  | NA     | NA    |     | NA            | 2 |
| AFRICA | Indian Ocean | Comoros    | Institut Pasteur de Madagascar, Antananarivo, Madagascar                                | 42  | Anjouan       | 2011 | Resident | Symptomatic  | 0.8-10 | 46%   |     | 600-199,750   | 2 |
| AFRICA | Indian Ocean | Comoros    | Institut Pasteur de Madagascar, Antananarivo, Madagascar                                | 64  | Grande Comore | 2011 | Resident | Symptomatic  | 0.5-5  | 51%   |     | 549-192,000   | 2 |
| AFRICA | Indian Ocean | Comoros    | Institut Pasteur de Madagascar, Antananarivo, Madagascar                                | 14  | Grande Comore | 2011 | Resident | Asymptomatic | 0.7-6  | 43%   | 92% | 1,035-177,777 | 2 |
| AFRICA | Indian Ocean | Comoros    | Institut Pasteur de Madagascar, Antananarivo, Madagascar                                | 156 | Grande Comore | 2013 | Resident | Symptomatic  | 1-11   | 48%   |     | 468-200,000   | 2 |
| AFRICA | Indian Ocean | Comoros    | Institut Pasteur de Madagascar, Antananarivo, Madagascar                                | 13  | Grande Comore | 2013 | Resident | Asymptomatic | 1-9    | 64%   |     | 514-131,076   | 2 |
| AFRICA | Indian Ocean | Comoros    | Institut Pasteur de Madagascar, Antananarivo, Madagascar                                | 8   | Moheli        | 2011 | Resident | Symptomatic  | 2-9    | 0%    |     | 517-1,442     | 2 |
| AFRICA | Indian Ocean | Comoros    | Institut Pasteur de Madagascar, Antananarivo, Madagascar                                | 12  | Moheli        | 2011 | Resident | Asymptomatic | 1-12   | 58%   |     | 557-2,297     | 2 |
| AFRICA | Indian Ocean | Comoros    | Institut de Recherche Biomédicale des Armées, Marseille, France                         | 27  | Mayotte       | 2013 | Resident | Symptomatic  | 0.5-70 | 59%   |     | 500-500,000   | 3 |
| AFRICA | Indian Ocean | Madagascar | Centre National de Référence du Paludisme, Hôpital Bichat Claude-Bernard, Paris, France | 2   | NA            | 2013 | Traveler | Symptomatic  | 61-62  | NA    |     | NA            | 2 |
| AFRICA | Indian Ocean | Madagascar | Institut Pasteur de Madagascar, Antananarivo, Madagascar                                | 9   | Ambato Boeny  | 2012 | Resident | Symptomatic  | 3-13   | 44%   |     | 556-359,280   | 2 |
| AFRICA | Indian Ocean | Madagascar | Institut Pasteur de Madagascar, Antananarivo, Madagascar                                | 26  | Ambato Boeny  | 2012 | Resident | Asymptomatic | 6-43   | 69.2% |     | 0-2,082       | 2 |
| AFRICA | Indian Ocean | Madagascar | Institut Pasteur de Madagascar, Antananarivo, Madagascar                                | 3   | Ambovombe     | 2012 | Resident | Symptomatic  | 5-15   | 33%   |     | 48-1,067      | 2 |
| AFRICA | Indian Ocean | Madagascar | Institut Pasteur de Madagascar, Antananarivo, Madagascar                                | 2   | Ambovombe     | 2012 | Resident | Asymptomatic | 11-14  | 50%   | 99% | NA            | 2 |
| AFRICA | Indian Ocean | Madagascar | Institut Pasteur de Madagascar, Antananarivo, Madagascar                                | 1   | Ihosy         | 2012 | Resident | Asymptomatic | 5      | 100%  |     | 40            | 2 |
| AFRICA | Indian Ocean | Madagascar | Institut Pasteur de Madagascar, Antananarivo, Madagascar                                | 1   | Antsirabe     | 2012 | Resident | Asymptomatic | 17     | 100%  |     | 40-643        | 2 |
| AFRICA | Indian Ocean | Madagascar | Institut Pasteur de Madagascar, Antananarivo, Madagascar                                | 1   | Antsiranana   | 2012 | Resident | Symptomatic  | 13     | 100%  |     | 2,088         | 2 |
| AFRICA | Indian Ocean | Madagascar | Institut Pasteur de Madagascar, Antananarivo, Madagascar                                | 4   | Antsiranana   | 2012 | Resident | Asymptomatic | 11-19  | 50%   |     | NA            | 2 |
| AFRICA | Indian Ocean | Madagascar | Institut Pasteur de Madagascar, Antananarivo, Madagascar                                | 3   | Antsohihy     | 2012 | Resident | Symptomatic  | 6-7    | 66%   |     | 720-17,820    | 2 |

|        |              |            |                                                          |    |                  |      |          |              |       |       |              |   |
|--------|--------------|------------|----------------------------------------------------------|----|------------------|------|----------|--------------|-------|-------|--------------|---|
| AFRICA | Indian Ocean | Madagascar | Institut Pasteur de Madagascar, Antananarivo, Madagascar | 45 | Antsohihy        | 2012 | Resident | Asymptomatic | 1-75  | 51.1% | 0-6,596      | 2 |
| AFRICA | Indian Ocean | Madagascar | Institut Pasteur de Madagascar, Antananarivo, Madagascar | 4  | Belo Tsiribihina | 2012 | Resident | Symptomatic  | 4-22  | 25%   | 3,675-8912   | 2 |
| AFRICA | Indian Ocean | Madagascar | Institut Pasteur de Madagascar, Antananarivo, Madagascar | 5  | Belo Tsiribihina | 2012 | Resident | Asymptomatic | 7-12  | 60%   | NA           | 2 |
| AFRICA | Indian Ocean | Madagascar | Institut Pasteur de Madagascar, Antananarivo, Madagascar | 2  | Ejeda            | 2012 | Resident | Asymptomatic | 11-50 | 0%    | NA           | 2 |
| AFRICA | Indian Ocean | Madagascar | Institut Pasteur de Madagascar, Antananarivo, Madagascar | 1  | Farafangana      | 2012 | Resident | Symptomatic  | 4     | 100%  | 0            | 2 |
| AFRICA | Indian Ocean | Madagascar | Institut Pasteur de Madagascar, Antananarivo, Madagascar | 9  | Farafangana      | 2012 | Resident | Asymptomatic | 1-38  | 66.6% | 16-1,980     | 2 |
| AFRICA | Indian Ocean | Madagascar | Institut Pasteur de Madagascar, Antananarivo, Madagascar | 2  | Fianarantsoa     | 2012 | Resident | Symptomatic  | 11-31 | 50%   | 12,251       | 2 |
| AFRICA | Indian Ocean | Madagascar | Institut Pasteur de Madagascar, Antananarivo, Madagascar | 1  | Ihosy            | 2012 | Resident | Asymptomatic | 5     | 100%  | 40           | 2 |
| AFRICA | Indian Ocean | Madagascar | Institut Pasteur de Madagascar, Antananarivo, Madagascar | 3  | Maevatanana      | 2012 | Resident | Symptomatic  | 7-14  | 66%   | 0-24         | 2 |
| AFRICA | Indian Ocean | Madagascar | Institut Pasteur de Madagascar, Antananarivo, Madagascar | 10 | Maevatanana      | 2012 | Resident | Asymptomatic | 2-18  | 40%   | 0-22,272     | 2 |
| AFRICA | Indian Ocean | Madagascar | Institut Pasteur de Madagascar, Antananarivo, Madagascar | 5  | Mahajanga        | 2012 | Resident | Asymptomatic | 3-46  | 60%   | 16-151       | 2 |
| AFRICA | Indian Ocean | Madagascar | Institut Pasteur de Madagascar, Antananarivo, Madagascar | 28 | Maintirano       | 2012 | Resident | Asymptomatic | 1-23  | 61%   | 0-19,440     | 2 |
| AFRICA | Indian Ocean | Madagascar | Institut Pasteur de Madagascar, Antananarivo, Madagascar | 4  | Mananjary        | 2012 | Resident | Asymptomatic | 3-14  | 75%   | 469-2,010    | 2 |
| AFRICA | Indian Ocean | Madagascar | Institut Pasteur de Madagascar, Antananarivo, Madagascar | 1  | Mandritsara      | 2012 | Resident | Asymptomatic | 8     | 100%  | 39           | 2 |
| AFRICA | Indian Ocean | Madagascar | Institut Pasteur de Madagascar, Antananarivo, Madagascar | 2  | Maroantsetra     | 2012 | Resident | Asymptomatic | 15-16 | 50%   | NA           | 2 |
| AFRICA | Indian Ocean | Madagascar | Institut Pasteur de Madagascar, Antananarivo, Madagascar | 1  | Miandrivazo      | 2012 | Resident | Symptomatic  | 11    | 100%  | 4,883        | 2 |
| AFRICA | Indian Ocean | Madagascar | Institut Pasteur de Madagascar, Antananarivo, Madagascar | 3  | Miandrivazo      | 2012 | Resident | Asymptomatic | 6-44  | 66%   | NA           | 2 |
| AFRICA | Indian Ocean | Madagascar | Institut Pasteur de Madagascar, Antananarivo, Madagascar | 1  | Moramanga        | 2012 | Resident | Asymptomatic | 12    | 0%    | NA           | 2 |
| AFRICA | Indian Ocean | Madagascar | Institut Pasteur de Madagascar, Antananarivo, Madagascar | 2  | Moramanga        | 2013 | Resident | Asymptomatic | 6-15  | 100%  | 174          | 2 |
| AFRICA | Indian Ocean | Madagascar | Institut Pasteur de Madagascar, Antananarivo, Madagascar | 2  | Morombe          | 2012 | Resident | Symptomatic  | 5-10  | 100%  | 1,530-26,271 | 2 |
| AFRICA | Indian Ocean | Madagascar | Institut Pasteur de Madagascar, Antananarivo, Madagascar | 13 | Morombe          | 2012 | Resident | Asymptomatic | 2-35  | 61%   | 0-667,080    | 2 |
| AFRICA | Indian Ocean | Madagascar | Institut Pasteur de Madagascar, Antananarivo, Madagascar | 4  | Morondava        | 2012 | Resident | Symptomatic  | 5-10  | 75%   | 163-4,067    | 2 |
| AFRICA | Indian Ocean | Madagascar | Institut Pasteur de Madagascar, Antananarivo, Madagascar | 7  | Morondava        | 2012 | Resident | Asymptomatic | 6-18  | 28.5% | 95-112       | 2 |



|        |                 |              |                                                                                                                                  |     |                 |      |          |              |        |       |     |              |     |
|--------|-----------------|--------------|----------------------------------------------------------------------------------------------------------------------------------|-----|-----------------|------|----------|--------------|--------|-------|-----|--------------|-----|
| AFRICA | Indian Ocean    | Madagascar   | Institut Pasteur de Madagascar, Antananarivo, Madagascar                                                                         | 2   | Nosy-be         | 2012 | Resident | Asymptomatic | 2-5    | 100%  |     | 23-158       | 2   |
| AFRICA | Indian Ocean    | Madagascar   | Institut Pasteur de Madagascar, Antananarivo, Madagascar                                                                         | 5   | Sainte Marie    | 2012 | Resident | Asymptomatic | 3-32   | 60%   |     | NA           | 2   |
| AFRICA | Indian Ocean    | Madagascar   | Institut Pasteur de Madagascar, Antananarivo, Madagascar                                                                         | 4   | Taolagnaro      | 2012 | Resident | Symptomatic  | 5-20   | 50%   |     | 8-2,520      | 2   |
| AFRICA | Indian Ocean    | Madagascar   | Institut Pasteur de Madagascar, Antananarivo, Madagascar                                                                         | 33  | Taolagnaro      | 2012 | Resident | Asymptomatic | 3-40   | 44.1% |     | 0-3,492      | 2   |
| AFRICA | Indian Ocean    | Madagascar   | Institut Pasteur de Madagascar, Antananarivo, Madagascar                                                                         | 3   | Toamasina       | 2012 | Resident | Symptomatic  | 46447  | 66%   |     | 27-152       | 2   |
| AFRICA | Indian Ocean    | Madagascar   | Institut Pasteur de Madagascar, Antananarivo, Madagascar                                                                         | 22  | Toamasina       | 2012 | Resident | Asymptomatic | 3-29   | 54.5% |     | 0-2,394      | 2   |
| AFRICA | Indian Ocean    | Madagascar   | Institut Pasteur de Madagascar, Antananarivo, Madagascar                                                                         | 1   | Tsiroanomandidy | 2012 | Resident | Asymptomatic | 8      | 100%  |     | NA           | 2   |
| AFRICA | Southern Africa | Angola       | Fiocruz Fundação Oswaldo Cruz, Rio de Janeiro, Brazil                                                                            | 2   | Lubango         | 2011 | Resident | Symptomatic  | 19-28  | 0%    |     | 1,000-5,000  | 1   |
| AFRICA | Southern Africa | Angola       | Fiocruz Fundação Oswaldo Cruz, Rio de Janeiro, Brazil                                                                            | 29  | Luanda          | 2012 | Resident | Symptomatic  | 12-67  | 58%   | 91% | 500-5,000    | 1   |
| AFRICA | Southern Africa | Angola       | Centre National de Référence du Paludisme, Hôpital Bichat Claude-Bernard, Paris, France                                          | 1   | NA              | 2014 | Traveler | Symptomatic  | NA     | NA    |     | 50           | 2   |
| AFRICA | Southern Africa | Angola       | Malaria Reference Laboratory, London, UK                                                                                         | 2   | NA              | 2014 | Traveler | Symptomatic  | NA     | NA    |     | NA           | 3   |
| AFRICA | Southern Africa | Malawi       | Centre National de Référence du Paludisme, Hôpital Bichat Claude-Bernard, Paris, France/Malaria Reference Laboratory, London, UK | 13  | NA              | 2014 | Traveler | Symptomatic  | NA     | NA    | 0%  | NA           | 2/3 |
| AFRICA | Southern Africa | Mozambique   | Malaria Reference Laboratory, London, UK                                                                                         | 5   | NA              | 2014 | Traveler | Symptomatic  | NA     | NA    | 0%  | NA           | 3   |
| AFRICA | Southern Africa | South Africa | Malaria Reference Laboratory, London, UK                                                                                         | 2   | NA              | 2014 | Traveler | Symptomatic  | NA     | NA    | 0%  | NA           | 3   |
| AFRICA | Southern Africa | Zambia       | Tropical Diseases Research Center, Ndola, Zambia                                                                                 | 298 | NA              | 2012 | Resident | NA           | NA     | NA    | 0%  | NA           | 1   |
| AFRICA | Southern Africa | Zambia       | Malaria Reference Laboratory, London, UK                                                                                         | 6   | NA              | 2014 | Traveler | Symptomatic  | NA     | NA    |     | NA           | 3   |
| AFRICA | Southern Africa | Zimbabwe     | Malaria Reference Laboratory, London, UK                                                                                         | 7   | NA              | 2014 | Traveler | Symptomatic  | NA     | NA    | 0%  | NA           | 3   |
| AFRICA | West Africa     | Benin        | Centre National de Référence du Paludisme, Hôpital Bichat Claude-Bernard, Paris, France                                          | 21  | NA              | 2013 | Traveler | Symptomatic  | 3-87   | NA    |     | NA           | 2   |
| AFRICA | West Africa     | Benin        | Centre National de Référence du Paludisme, Hôpital Bichat Claude-Bernard, Paris, France                                          | 12  | NA              | 2014 | Traveler | Symptomatic  | 15-69  | 50%   | 77% | NA           | 2   |
| AFRICA | West Africa     | Benin        | Institut de Recherche pour le Développement, Cotonou, Benin                                                                      | 61  | Cotonou         | 2012 | Resident | Symptomatic  | 0.4-6  | 51%   |     | 300-720,000  | 1   |
| AFRICA | West Africa     | Benin        | Institut de Recherche pour le Développement, Cotonou, Benin                                                                      | 171 | Cotonou         | 2013 | Resident | Symptomatic  | 0.8-6  | 59%   |     | 1280-360,000 | 1   |
| AFRICA | West Africa     | Burkina Faso | Centre National de Recherche et de Formation sur le Paludisme, Ouagadougou, Burkina Faso                                         | 145 | Balonghin       | 2012 | Resident | Symptomatic  | 1-62   | 52%   | 90% | 832-332,818  | 2   |
| AFRICA | West Africa     | Burkina Faso | Centre National de Recherche et de Formation sur le Paludisme, Ouagadougou, Burkina Faso                                         | 39  | Banfora         | 2013 | Resident | Symptomatic  | 0,1-33 | 67%   |     | NA           | 2   |

|        |             |               |                                                                                                                                  |     |             |      |          |             |        |       |     |               |     |
|--------|-------------|---------------|----------------------------------------------------------------------------------------------------------------------------------|-----|-------------|------|----------|-------------|--------|-------|-----|---------------|-----|
| AFRICA | West Africa | Burkina Faso  | Centre National de Recherche et de Formation sur le Paludisme, Ouagadougou, Burkina Faso                                         | 103 | Niangologo  | 2013 | Resident | Symptomatic | 0,6-10 | 52%   |     | NA            | 2   |
| AFRICA | West Africa | Burkina Faso  | Centre National de Recherche et de Formation sur le Paludisme, Ouagadougou, Burkina Faso                                         | 21  | Niangologo  | 2012 | Resident | Symptomatic | 0,4-57 | 33%   |     | NA            | 2   |
| AFRICA | West Africa | Burkina Faso  | Centre National de Référence du Paludisme, Hôpital Bichat Claude-Bernard, Paris, France                                          | 50  | NA          | 2013 | Traveler | Symptomatic | 8-73   | NA    |     | NA            | 2   |
| AFRICA | West Africa | Burkina Faso  | Centre National de Référence du Paludisme, Hôpital Bichat Claude-Bernard, Paris, France                                          | 11  | NA          | 2014 | Traveler | Symptomatic | 15-61  | NA    |     | NA            | 2   |
| AFRICA | West Africa | Burkina Faso  | Institut de Recherche Biomédicale des Armées, Marseille, France                                                                  | 15  | NA          | 2014 | Resident | Symptomatic | NA     | 100%  |     | NA            | 3   |
| AFRICA | West Africa | Burkina Faso  | Institut de Recherche en Sciences de la Santé, Ouagadougou, Burkina Faso                                                         | 200 | Colsama     | 2012 | Resident | Symptomatic | 0.5-61 | 43.5% |     | 2,039-199,250 | 2   |
| AFRICA | West Africa | Burkina Faso  | Institut de Recherche en Sciences de la Santé, Ouagadougou, Burkina Faso                                                         | 28  | Sakabi      | 2012 | Resident | Symptomatic | 1.6-20 | 46%   |     | 2,708-161,212 | 2   |
| AFRICA | West Africa | Gambia        | Centre National de Référence du Paludisme, Hôpital Bichat Claude-Bernard, Paris, France                                          | 2   | NA          | 2013 | Traveler | Symptomatic | NA     | NA    | 0%  | NA            | 2   |
| AFRICA | West Africa | Gambia        | Malaria Reference Laboratory, London, UK                                                                                         | 10  | NA          | 2014 | Traveler | Symptomatic | NA     | NA    |     | NA            | 3   |
| AFRICA | West Africa | Ghana         | Centre National de Référence du Paludisme, Hôpital Bichat Claude-Bernard, Paris, France                                          | 7   | NA          | 2013 | Traveler | Symptomatic | NA     | NA    | 0%  | NA            | 2   |
| AFRICA | West Africa | Ghana         | Malaria Reference Laboratory, London, UK                                                                                         | 30  | NA          | 2014 | Traveler | Symptomatic | NA     | NA    |     | NA            | 3   |
| AFRICA | West Africa | Guinea        | Centre National de Référence du Paludisme, Hôpital Bichat Claude-Bernard, Paris, France                                          | 79  | NA          | 2013 | Traveler | Symptomatic | 1-72   | NA    | 0%  | NA            | 2   |
| AFRICA | West Africa | Guinea        | Centre National de Référence du Paludisme, Hôpital Bichat Claude-Bernard, Paris, France                                          | 8   | NA          | 2014 | Traveler | Symptomatic | NA     | NA    |     | NA            | 2   |
| AFRICA | West Africa | Guinea Bissau | Centre National de Référence du Paludisme, Hôpital Bichat Claude-Bernard, Paris, France                                          | 3   | NA          | 2013 | Traveler | Symptomatic | 14-48  | NA    | 0%  | NA            | 2   |
| AFRICA | West Africa | Ivory Coast   | Centre Suisse de Recherches Scientifiques en Côte d'Ivoire, Abidjan, Ivory Coast                                                 | 31  | Abobodoume  | 2014 | Resident | Symptomatic | 18-57  | 41.9% |     | 32-342,000    | 2   |
| AFRICA | West Africa | Ivory Coast   | Centre Suisse de Recherches Scientifiques en Côte d'Ivoire, Abidjan, Ivory Coast                                                 | 25  | Adiopodoume | 2013 | Resident | Symptomatic | 19-62  | 28.0% |     | 144-109,360   | 2   |
| AFRICA | West Africa | Ivory Coast   | Centre Suisse de Recherches Scientifiques en Côte d'Ivoire, Abidjan, Ivory Coast                                                 | 23  | Wassakara   | 2013 | Resident | Symptomatic | 18-54  | 34.7% |     | 112-133,680   | 2   |
| AFRICA | West Africa | Ivory Coast   | Centre Suisse de Recherches Scientifiques en Côte d'Ivoire, Abidjan, Ivory Coast                                                 | 67  | Wassakara   | 2014 | Resident | Symptomatic | 19-81  | 35.8% |     | 32-305,120    | 2   |
| AFRICA | West Africa | Ivory Coast   | Parasitologie et mycologie, Hôpital Bichat Claude-Bernard, Paris, France                                                         | 296 | NA          | 2013 | Resident | Symptomatic | 0.5-69 | NA    | 67% | NA            | 2   |
| AFRICA | West Africa | Ivory Coast   | Parasitologie et mycologie, Hôpital Bichat Claude-Bernard, Paris, France                                                         | 111 | NA          | 2014 | Resident | Symptomatic | 2-78   | 58.3% |     | NA            | 2   |
| AFRICA | West Africa | Ivory Coast   | Centre National de Référence du Paludisme, Hôpital Bichat Claude-Bernard, Paris, France                                          | 32  | NA          | 2013 | Traveler | Symptomatic | NA     | NA    |     | NA            | 2   |
| AFRICA | West Africa | Ivory Coast   | Centre National de Référence du Paludisme, Hôpital Bichat Claude-Bernard, Paris, France/Malaria Reference Laboratory, London, UK | 15  | NA          | 2014 | Traveler | Symptomatic | NA     | NA    |     | NA            | 2/3 |
| AFRICA | West Africa | Ivory Coast   | Institut Pasteur de Côte d'Ivoire, Abidjan, Ivory Coast                                                                          | 176 | Abidjan     | 2013 | Resident | Symptomatic | 0.8-68 | 45.4% |     | 1,066-587,000 | 2   |

|        |             |             |                                                                                                                                  |     |                    |      |          |              |         |       |     |               |     |
|--------|-------------|-------------|----------------------------------------------------------------------------------------------------------------------------------|-----|--------------------|------|----------|--------------|---------|-------|-----|---------------|-----|
| AFRICA | West Africa | Ivory Coast | Institut Pasteur de Côte d'Ivoire, Abidjan, Ivory Coast                                                                          | 133 | Abidjan            | 2014 | Resident | Symptomatic  | 0.7-49  | 43.1% |     | 1,000-450,909 | 2   |
| AFRICA | West Africa | Ivory Coast | Institut Pasteur de Côte d'Ivoire, Abidjan, Ivory Coast                                                                          | 62  | Ayamé              | 2013 | Resident | Symptomatic  | 0.1-53  | 55.7% |     | 1,340-397,730 | 2   |
| AFRICA | West Africa | Ivory Coast | Institut Pasteur de Côte d'Ivoire, Abidjan, Ivory Coast                                                                          | 78  | Korhogo            | 2013 | Resident | Symptomatic  | 1-70    | 44.1% |     | 2,000-200,000 | 2   |
| AFRICA | West Africa | Ivory Coast | Institut Pasteur de Côte d'Ivoire, Abidjan, Ivory Coast                                                                          | 108 | Man                | 2013 | Resident | Symptomatic  | 1-62    | 54.6% |     | 2,005-200,000 | 2   |
| AFRICA | West Africa | Liberia     | Malaria Reference Laboratory, London, UK                                                                                         | 1   | NA                 | 2014 | Traveler | Symptomatic  | NA      | NA    | 0%  | NA            | 3   |
| AFRICA | West Africa | Mali        | Parasitologie et mycologie, Hôpital Bichat Claude-Bernard, Paris, France                                                         | 83  | NA                 | 2012 | Resident | Symptomatic  | 5-78    | NA    |     | NA            | 2   |
| AFRICA | West Africa | Mali        | Parasitologie et mycologie, Hôpital Bichat Claude-Bernard, Paris, France                                                         | 132 | NA                 | 2013 | Resident | Symptomatic  | 0.1-73  | NA    |     | NA            | 2   |
| AFRICA | West Africa | Mali        | Parasitologie et mycologie, Hôpital Bichat Claude-Bernard, Paris, France                                                         | 2   | NA                 | 2014 | Resident | Symptomatic  | 32-49   | NA    |     | NA            | 2   |
| AFRICA | West Africa | Mali        | Centre National de Référence du Paludisme, Hôpital Bichat Claude-Bernard, Paris, France                                          | 9   | NA                 | 2013 | Traveler | Symptomatic  | NA      | NA    | 52% | 50-345,000    | 2   |
| AFRICA | West Africa | Mali        | Institut de Recherche Biomédicale des Armées, Marseille, France                                                                  | 14  | NA                 | 2013 | Resident | Symptomatic  | NA      | 100%  |     | 50-125,000    | 3   |
| AFRICA | West Africa | Mali        | Malaria Research & Training Cente, Bamako Mali                                                                                   | 227 | Banambani          | 2013 | Resident | Symptomatic  | 0,75-42 | 56%   |     | 1,000-345,789 | 1   |
| AFRICA | West Africa | Mauritania  | Centre National de Référence du Paludisme, Hôpital Bichat Claude-Bernard, Paris, France                                          | 1   | NA                 | 2013 | Traveler | Symptomatic  | 64      | NA    | 0%  | NA            | 2   |
| AFRICA | West Africa | Niger       | Centre de Recherche Médicale et Sanitaire, Niamey, Niger                                                                         | 602 | Niamey             | 2013 | Resident | Symptomatic  | 0.08-75 | 45.0% |     | NA            | 1   |
| AFRICA | West Africa | Niger       | Epicentre Research Center, Mbarara, Uganda                                                                                       | 164 | Maradi, Madarounfa | 2013 | Resident | Symptomatic  | NA      | NA    | 70% | 1,000-766,667 | 2   |
| AFRICA | West Africa | Niger       | Centre National de Référence du Paludisme, Hôpital Bichat Claude-Bernard, Paris, France                                          | 10  | NA                 | 2013 | Traveler | Symptomatic  | NA      | NA    |     | NA            | 2   |
| AFRICA | West Africa | Nigeria     | Centre National de Référence du Paludisme, Hôpital Bichat Claude-Bernard, Paris, France                                          | 6   | NA                 | 2013 | Traveler | Symptomatic  | 34-42   | NA    |     | NA            | 2   |
| AFRICA | West Africa | Nigeria     | Centre National de Référence du Paludisme, Hôpital Bichat Claude-Bernard, Paris, France/Malaria Reference Laboratory, London, UK | 91  | NA                 | 2014 | Traveler | Symptomatic  | NA      | NA    | 63% | NA            | 2/3 |
| AFRICA | West Africa | Nigeria     | University of Ibadan, Ibadan, Nigeria                                                                                            | 49  | Ibadan             | 2009 | Resident | Asymptomatic | 2-97    | 44.9% |     | 40-117,866    | 2   |
| AFRICA | West Africa | Nigeria     | University of Ibadan, Ibadan, Nigeria                                                                                            | 153 | Ibadan             | 2009 | Resident | Symptomatic  | 4-90    | 48.6% |     | 40-470,000    | 2   |
| AFRICA | West Africa | Senegal     | Centre National de Référence du Paludisme, Hôpital Bichat Claude-Bernard, Paris, France                                          | 63  | NA                 | 2013 | Traveler | Symptomatic  | NA      | NA    |     | NA            | 2   |
| AFRICA | West Africa | Senegal     | Centre National de Référence du Paludisme, Hôpital Bichat Claude-Bernard, Paris, France                                          | 4   | NA                 | 2014 | Traveler | Symptomatic  | NA      | NA    |     | NA            | 2   |
| AFRICA | West Africa | Senegal     | Institut Pasteur de Dakar, Dakar, Senegal                                                                                        | 6   | Dakar              | 2013 | Resident | Symptomatic  | 10-28   | 83%   | 57% | 120-7,746     | 2   |
| AFRICA | West Africa | Senegal     | Institut Pasteur de Dakar, Dakar, Senegal                                                                                        | 102 | Tambacounda        | 2012 | Resident | Symptomatic  | 0,1-52  | 48.4% |     | 68-199,200    | 2   |
| AFRICA | West Africa | Senegal     | Institut de Recherche Biomédicale des Armées, Marseille, France                                                                  | 138 | Dakar              | 2012 | Resident | Symptomatic  | 5-89    | 63%   |     | 40-120,000    | 3   |

|        |              |              |                                                                                         |     |            |      |          |             |       |       |      |               |   |
|--------|--------------|--------------|-----------------------------------------------------------------------------------------|-----|------------|------|----------|-------------|-------|-------|------|---------------|---|
| AFRICA | West Africa  | Sierra Leone | Centre National de Référence du Paludisme, Hôpital Bichat Claude-Bernard, Paris, France | 5   | NA         | 2013 | Traveler | Symptomatic | NA    | NA    |      | NA            | 2 |
| AFRICA | West Africa  | Sierra Leone | Malaria Reference Laboratory, London, UK                                                | 32  | NA         | 2014 | Traveler | Symptomatic | NA    | NA    | 0%   | NA            | 3 |
| AFRICA | West Africa  | Togo         | Centre National de Référence du Paludisme, Hôpital Bichat Claude-Bernard, Paris, France | 26  | NA         | 2013 | Traveler | Symptomatic | NA    | NA    |      | NA            | 2 |
| AFRICA | West Africa  | Togo         | Centre National de Référence du Paludisme, Hôpital Bichat Claude-Bernard, Paris, France | 4   | NA         | 2014 | Traveler | Symptomatic | NA    | NA    |      | NA            | 2 |
| AFRICA | West Africa  | Togo         | Malaria Reference Laboratory, London, UK                                                | 2   | NA         | 2014 | Traveler | Symptomatic | NA    | NA    |      | NA            | 3 |
| AFRICA | West Africa  | Togo         | WHO, Global Malaria Programme, Geneva, Switzerland                                      | 143 | Lomé       | 2013 | Resident | Symptomatic | 6-59  | 42%   | 94%  | 2,187-208,385 | 3 |
| AFRICA | West Africa  | Togo         | WHO, Global Malaria Programme, Geneva, Switzerland                                      | 163 | Niamtougou | 2012 | Resident | Symptomatic | 6-59  | 55.2% |      | 2,172-235,000 | 3 |
| AFRICA | West Africa  | Togo         | WHO, Global Malaria Programme, Geneva, Switzerland                                      | 170 | Sokodé     | 2012 | Resident | Symptomatic | 6-59  | 51.2% |      | 2,026-240,000 | 3 |
| ASIA   | Central Asia | Afghanistan  | WHO, Global Malaria Programme, Geneva, Switzerland                                      | 24  | Kunar      | 2012 | Resident | Symptomatic | 3-74  | 46%   | 98%  | NA            | 1 |
| ASIA   | Central Asia | Afghanistan  | WHO, Global Malaria Programme, Geneva, Switzerland                                      | 38  | Kunar      | 2013 | Resident | Symptomatic | 1-70  | 59%   |      | NA            | 1 |
| ASIA   | Central Asia | Iran         | Institut Pasteur d'Iran, Tehran, Iran                                                   | 21  | Chabahar   | 2013 | Resident | Symptomatic | NA    | 81%   |      | NA            | 2 |
| ASIA   | Central Asia | Iran         | Institut Pasteur d'Iran, Tehran, Iran                                                   | 4   | Iranshahr  | 2013 | Resident | Symptomatic | NA    | 75%   | 100% | NA            | 2 |
| ASIA   | Central Asia | Iran         | Institut Pasteur d'Iran, Tehran, Iran                                                   | 25  | Saravan    | 2013 | Resident | Symptomatic | NA    | 92%   |      | NA            | 2 |
| ASIA   | Central Asia | Iran         | Institut Pasteur d'Iran, Tehran, Iran                                                   | 28  | Sarbaz     | 2013 | Resident | Symptomatic | NA    | 82%   |      | NA            | 2 |
| ASIA   | East Asia    | China        | Institut Pasteur of Shanghai Chinese Academy of sciences, Shanghai, China               | 94  | Jiangsu    | 2013 | Resident | Symptomatic | 17-60 | 100%  |      | 208-533,333   | 2 |
| ASIA   | East Asia    | China        | Institut Pasteur of Shanghai Chinese Academy of sciences, Shanghai, China               | 6   | Tengchong  | 2008 | Resident | Symptomatic | 33-45 | 100%  |      | 3,755-59,050  | 2 |
| ASIA   | East Asia    | China        | Institut Pasteur of Shanghai Chinese Academy of sciences, Shanghai, China               | 5   | Tengchong  | 2009 | Resident | Symptomatic | 20-43 | 80%   |      | 480-83,400    | 2 |
| ASIA   | East Asia    | China        | Institut Pasteur of Shanghai Chinese Academy of sciences, Shanghai, China               | 4   | Tengchong  | 2010 | Resident | Symptomatic | 12-50 | 100%  |      | 1,760-821,700 | 2 |
| ASIA   | East Asia    | China        | Institut Pasteur of Shanghai Chinese Academy of sciences, Shanghai, China               | 3   | Tengchong  | 2011 | Resident | Symptomatic | 21-27 | 100%  |      | 162-5,076     | 2 |
| ASIA   | East Asia    | China        | Institut Pasteur of Shanghai Chinese Academy of sciences, Shanghai, China               | 14  | Tengchong  | 2012 | Resident | Symptomatic | 20-43 | 64%   | 93%  | 810-22,165    | 2 |
| ASIA   | East Asia    | China        | Institut Pasteur of Shanghai Chinese Academy of sciences, Shanghai, China               | 1   | Tengchong  | 2013 | Resident | Symptomatic | 53    | 100%  |      | 7,453         | 2 |
| ASIA   | East Asia    | China        | Institut Pasteur of Shanghai Chinese Academy of sciences, Shanghai, China               | 14  | Yingjiang  | 2011 | Resident | Symptomatic | 21-46 | 100%  |      | 120-494,600   | 2 |
| ASIA   | East Asia    | China        | Institut Pasteur of Shanghai Chinese Academy of sciences, Shanghai, China               | 8   | Yingjiang  | 2012 | Resident | Symptomatic | 41-60 | 100%  |      | 2,431-55,720  | 2 |
| ASIA   | East Asia    | China        | Department of Entomology, Pennsylvania State University, Pennsylvania, USA              | 2   | Yunnan     | 2004 | Resident | Symptomatic | NA    | NA    |      | NA            | 3 |

|      |                |            |                                                                            |     |                         |      |          |             |       |         |      |              |   |
|------|----------------|------------|----------------------------------------------------------------------------|-----|-------------------------|------|----------|-------------|-------|---------|------|--------------|---|
| ASIA | East Asia      | China      | WHO, Global Malaria Programme, Geneva, Switzerland                         | 10  | Yingjiang               | 2013 | Resident | Symptomatic | NA    | NA      |      | NA           | 3 |
| ASIA | East Asia      | China      | WHO, Global Malaria Programme, Geneva, Switzerland                         | 26  | Yingjiang               | 2010 | Resident | Symptomatic | 12-49 | 73%     |      | 560-821,700  | 3 |
| ASIA | East Asia      | China      | WHO, Global Malaria Programme, Geneva, Switzerland                         | 29  | Yingjiang               | 2014 | Resident | Symptomatic | 10-54 | 77%     |      | 860-225,000  | 3 |
| ASIA | East Asia      | Myanmar    | Department of Entomology, Pennsylvania State University, Pennsylvania, USA | 13  | Kachin                  | 2007 | Resident | Symptomatic | 12-47 | 54%     |      | NA           | 3 |
| ASIA | East Asia      | Myanmar    | Department of Entomology, Pennsylvania State University, Pennsylvania, USA | 44  | Kachin                  | 2008 | Resident | Symptomatic | NA    | NA      |      | NA           | 3 |
| ASIA | East Asia      | Myanmar    | Department of Entomology, Pennsylvania State University, Pennsylvania, USA | 79  | Kachin                  | 2009 | Resident | Symptomatic | 3-47  | 78.2%   |      | NA           | 3 |
| ASIA | East Asia      | Myanmar    | Department of Entomology, Pennsylvania State University, Pennsylvania, USA | 7   | Kachin                  | 2010 | Resident | Symptomatic | NA    | NA      |      | NA           | 3 |
| ASIA | East Asia      | Myanmar    | Department of Entomology, Pennsylvania State University, Pennsylvania, USA | 8   | Kachin                  | 2012 | Resident | Symptomatic | NA    | NA      |      | NA           | 3 |
| ASIA | East Asia      | Myanmar    | Department of Entomology, Pennsylvania State University, Pennsylvania, USA | 46  | Kachin                  | 2013 | Resident | Symptomatic | NA    | NA      |      | NA           | 3 |
| ASIA | East Asia      | Myanmar    | Department of Entomology, Pennsylvania State University, Pennsylvania, USA | 6   | Wa State                | 2007 | Resident | Symptomatic | NA    | NA      | 66%  | NA           | 3 |
| ASIA | East Asia      | Myanmar    | Department of Entomology, Pennsylvania State University, Pennsylvania, USA | 16  | Wa State                | 2008 | Resident | Symptomatic | 7-27  | 33%     |      | NA           | 3 |
| ASIA | East Asia      | Myanmar    | Department of Entomology, Pennsylvania State University, Pennsylvania, USA | 3   | Wa State                | 2010 | Resident | Symptomatic | NA    | NA      |      | NA           | 3 |
| ASIA | East Asia      | Myanmar    | Department of Entomology, Pennsylvania State University, Pennsylvania, USA | 1   | Wa State                | 2011 | Resident | Symptomatic | NA    | NA      |      | NA           | 3 |
| ASIA | East Asia      | Myanmar    | WHO, Global Malaria Programme, Geneva, Switzerland                         | 63  | Pyin Oo Lwin            | 2014 | Resident | Symptomatic | 8-65  | 73%     |      | 1063-14,824  | 1 |
| ASIA | East Asia      | Myanmar    | WHO, Global Malaria Programme, Geneva, Switzerland                         | 61  | Tamu                    | 2014 | Resident | Symptomatic | 12-62 | 60%     |      | 2,888-14,664 | 1 |
| ASIA | South Asia     | Bangladesh | Medical University of Vienna, Vienna, Austria                              | 18  | Bandarban               | 2011 | Resident | Symptomatic | 10-58 | 83%     |      | NA           | 2 |
| ASIA | South Asia     | Bangladesh | Medical University of Vienna, Vienna, Austria                              | 277 | Bandarban               | 2012 | Resident | Symptomatic | 10-74 | NA      | 32%  | NA           | 2 |
| ASIA | South Asia     | Bangladesh | WHO, Global Malaria Programme, Geneva, Switzerland                         | 38  | Lama                    | 2014 | Resident | Symptomatic | 7-90  | 80,50 % |      | 3360-47,556  | 1 |
| ASIA | South Asia     | Nepal      | WHO, Global Malaria Programme, Geneva, Switzerland                         | 7   | Dhangadi                | 2014 | Resident | Symptomatic | 19-35 | 100%    |      | 1040-27,778  | 1 |
| ASIA | South Asia     | Nepal      | WHO, Global Malaria Programme, Geneva, Switzerland                         | 6   | Kanchanpur              | 2014 | Resident | Symptomatic | 29-55 | 83%     |      | 2,964-99,999 | 1 |
| ASIA | South Asia     | Nepal      | WHO, Global Malaria Programme, Geneva, Switzerland                         | 6   | Mahakali Zonal Hospital | 2013 | Resident | Symptomatic | 29-55 | 83%     | 100% | 2,964-99,999 | 1 |
| ASIA | South Asia     | Nepal      | WHO, Global Malaria Programme, Geneva, Switzerland                         | 5   | Seti Zonal Hospital     | 2014 | Resident | Symptomatic | 19-35 | 100%    |      | 1040-27,778  | 1 |
| ASIA | Southeast Asia | Cambodia   | Institut Pasteur du Cambodge, Phnom Penh, Cambodia                         | 45  | Battambang              | 2012 | Resident | Symptomatic | NA    | NA      |      | NA           | 1 |
| ASIA | Southeast Asia | Cambodia   | Institut Pasteur du Cambodge, Phnom Penh, Cambodia                         | 36  | Battambang              | 2013 | Resident | Symptomatic | NA    | NA      | 0%   | NA           | 1 |

|      |                |          |                                                    |     |                |      |          |              |    |    |    |   |
|------|----------------|----------|----------------------------------------------------|-----|----------------|------|----------|--------------|----|----|----|---|
| ASIA | Southeast Asia | Cambodia | Institut Pasteur du Cambodge, Phnom Penh, Cambodia | 19  | Kampong Speu   | 2012 | Resident | Symptomatic  | NA | NA | NA | 1 |
| ASIA | Southeast Asia | Cambodia | Institut Pasteur du Cambodge, Phnom Penh, Cambodia | 2   | Kampong Speu   | 2013 | Resident | Symptomatic  | NA | NA | NA | 1 |
| ASIA | Southeast Asia | Cambodia | Institut Pasteur du Cambodge, Phnom Penh, Cambodia | 57  | Kampong Thom   | 2012 | Resident | Symptomatic  | NA | NA | NA | 1 |
| ASIA | Southeast Asia | Cambodia | Institut Pasteur du Cambodge, Phnom Penh, Cambodia | 8   | Kampot         | 2013 | Resident | Symptomatic  | NA | NA | NA | 1 |
| ASIA | Southeast Asia | Cambodia | Institut Pasteur du Cambodge, Phnom Penh, Cambodia | 9   | Kampot         | 2014 | Resident | Symptomatic  | NA | NA | NA | 1 |
| ASIA | Southeast Asia | Cambodia | Institut Pasteur du Cambodge, Phnom Penh, Cambodia | 17  | Kratie         | 2013 | Resident | Symptomatic  | NA | NA | NA | 1 |
| ASIA | Southeast Asia | Cambodia | Institut Pasteur du Cambodge, Phnom Penh, Cambodia | 5   | Kratie         | 2014 | Resident | Symptomatic  | NA | NA | NA | 1 |
| ASIA | Southeast Asia | Cambodia | Institut Pasteur du Cambodge, Phnom Penh, Cambodia | 17  | Mondolkiri     | 2013 | Resident | Symptomatic  | NA | NA | NA | 1 |
| ASIA | Southeast Asia | Cambodia | Institut Pasteur du Cambodge, Phnom Penh, Cambodia | 1   | Mondolkiri     | 2014 | Resident | Symptomatic  | NA | NA | NA | 1 |
| ASIA | Southeast Asia | Cambodia | Institut Pasteur du Cambodge, Phnom Penh, Cambodia | 48  | Oddar Meanchey | 2012 | Resident | Symptomatic  | NA | NA | NA | 1 |
| ASIA | Southeast Asia | Cambodia | Institut Pasteur du Cambodge, Phnom Penh, Cambodia | 59  | Oddar Meanchey | 2013 | Resident | Symptomatic  | NA | NA | NA | 1 |
| ASIA | Southeast Asia | Cambodia | Institut Pasteur du Cambodge, Phnom Penh, Cambodia | 4   | Oddar Meanchey | 2014 | Resident | Symptomatic  | NA | NA | NA | 1 |
| ASIA | Southeast Asia | Cambodia | Institut Pasteur du Cambodge, Phnom Penh, Cambodia | 155 | Pailin         | 2012 | Resident | Symptomatic  | NA | NA | NA | 1 |
| ASIA | Southeast Asia | Cambodia | Institut Pasteur du Cambodge, Phnom Penh, Cambodia | 58  | Pailin         | 2013 | Resident | Symptomatic  | NA | NA | NA | 1 |
| ASIA | Southeast Asia | Cambodia | Institut Pasteur du Cambodge, Phnom Penh, Cambodia | 12  | Pailin         | 2014 | Resident | Symptomatic  | NA | NA | NA | 1 |
| ASIA | Southeast Asia | Cambodia | Institut Pasteur du Cambodge, Phnom Penh, Cambodia | 13  | Preah Vihear   | 2013 | Resident | Symptomatic  | NA | NA | NA | 1 |
| ASIA | Southeast Asia | Cambodia | Institut Pasteur du Cambodge, Phnom Penh, Cambodia | 6   | Preah Vihear   | 2013 | Resident | Asymptomatic | NA | NA | NA | 1 |
| ASIA | Southeast Asia | Cambodia | Institut Pasteur du Cambodge, Phnom Penh, Cambodia | 4   | Preah Vihear   | 2014 | Resident | Symptomatic  | NA | NA | NA | 1 |
| ASIA | Southeast Asia | Cambodia | Institut Pasteur du Cambodge, Phnom Penh, Cambodia | 69  | Pursat         | 2012 | Resident | Symptomatic  | NA | NA | NA | 1 |
| ASIA | Southeast Asia | Cambodia | Institut Pasteur du Cambodge, Phnom Penh, Cambodia | 3   | Pursat         | 2013 | Resident | Symptomatic  | NA | NA | NA | 1 |
| ASIA | Southeast Asia | Cambodia | Institut Pasteur du Cambodge, Phnom Penh, Cambodia | 48  | Rattanakiri    | 2012 | Resident | Symptomatic  | NA | NA | NA | 1 |
| ASIA | Southeast Asia | Cambodia | Institut Pasteur du Cambodge, Phnom Penh, Cambodia | 70  | Rattanakiri    | 2012 | Resident | Asymptomatic | NA | NA | NA | 1 |
| ASIA | Southeast Asia | Cambodia | Institut Pasteur du Cambodge, Phnom Penh, Cambodia | 59  | Rattanakiri    | 2013 | Resident | Symptomatic  | NA | NA | NA | 1 |

|      |                |             |                                                               |     |                                           |      |          |              |       |     |      |               |   |
|------|----------------|-------------|---------------------------------------------------------------|-----|-------------------------------------------|------|----------|--------------|-------|-----|------|---------------|---|
| ASIA | Southeast Asia | Cambodia    | Institut Pasteur du Cambodge, Phnom Penh, Cambodia            | 32  | Rattanakiri                               | 2013 | Resident | Asymptomatic | NA    | NA  |      | NA            | 1 |
| ASIA | Southeast Asia | Cambodia    | Institut Pasteur du Cambodge, Phnom Penh, Cambodia            | 20  | Stung Treng                               | 2013 | Resident | Asymptomatic | NA    | NA  |      | NA            | 1 |
| ASIA | Southeast Asia | Cambodia    | Institut Pasteur du Cambodge, Phnom Penh, Cambodia            | 6   | Stung Treng                               | 2013 | Resident | Asymptomatic | NA    | NA  |      | NA            | 1 |
| ASIA | Southeast Asia | Indonesia   | Eijkman Institute for Molecular Biology, Jakarta, Indonesia   | 23  | Sumba                                     | 2011 | Resident | Symptomatic  | 3-54  | 45% | 96%  | 360-200,000   | 2 |
| ASIA | Southeast Asia | Indonesia   | Eijkman Institute for Molecular Biology, Jakarta, Indonesia   | 87  | Sumba                                     | 2012 | Resident | Symptomatic  | 1-59  | 53% |      | 120-480,000   | 2 |
| ASIA | Southeast Asia | Lao PDR     | Institut Pasteur du Laos, Vientiane, Lao PDR                  | 5   | Xepon, Savannakhet                        | 2013 | Resident | Symptomatic  | 7-27  | 60% | 99%  | NA            | 2 |
| ASIA | Southeast Asia | Lao PDR     | Institut Pasteur du Laos, Vientiane, Lao PDR                  | 42  | Xepon, Savannakhet                        | 2013 | Resident | Asymptomatic | 4-63  | 52% |      | NA            | 2 |
| ASIA | Southeast Asia | Lao PDR     | WHO, Global Malaria Programme, Geneva, Switzerland            | 26  | Champasak                                 | 2013 | Resident | Symptomatic  | 12-50 | 96% |      | 1,247-47,424  | 1 |
| ASIA | Southeast Asia | Lao PDR     | WHO, Global Malaria Programme, Geneva, Switzerland            | 49  | Saravanh                                  | 2013 | Resident | Symptomatic  | 3-42  | 59% |      | 1,448-186,920 | 1 |
| ASIA | Southeast Asia | Philippines | Research Institute for Tropical Medicine, Manila, Philippines | 117 | Palawan                                   | 2013 | Resident | Symptomatic  | 1-65  | 53% | 100% | 64-83,619     | 2 |
| ASIA | Southeast Asia | Philippines | Research Institute for Tropical Medicine, Manila, Philippines | 3   | Tawi-Tawi                                 | 2013 | Resident | Symptomatic  | 11-45 | 66% |      | 455-17,931    | 2 |
| ASIA | Southeast Asia | Thailand    | Thammasat University, Bangkok, Thailand                       | 11  | Mae Sot                                   | 2006 | Resident | Symptomatic  | 19-55 | 73% |      | NA            | 2 |
| ASIA | Southeast Asia | Thailand    | Thammasat University, Bangkok, Thailand                       | 2   | Mae Sot                                   | 2008 | Resident | Symptomatic  | 35-37 | 0%  |      | NA            | 2 |
| ASIA | Southeast Asia | Thailand    | Thammasat University, Bangkok, Thailand                       | 129 | Mae Sot                                   | 2009 | Resident | Symptomatic  | 18-60 | 49% |      | NA            | 2 |
| ASIA | Southeast Asia | Thailand    | Thammasat University, Bangkok, Thailand                       | 2   | Ranong                                    | 2009 | Resident | Symptomatic  | 38-39 | 50% |      | NA            | 2 |
| ASIA | Southeast Asia | Thailand    | Thammasat University, Bangkok, Thailand                       | 6   | Ranong                                    | 2010 | Resident | Symptomatic  | 18-45 | 50% |      | NA            | 2 |
| ASIA | Southeast Asia | Thailand    | Mahidol Vivax Research Unit, Bangkok, Thailand                | 43  | Sai Yok District, Kanchanaburi Province   | 2013 | Resident | NA           | 10-55 | 77% | 91%  | NA            | 2 |
| ASIA | Southeast Asia | Thailand    | Mahidol Vivax Research Unit, Bangkok, Thailand                | 10  | Sai Yok District, Kanchanaburi Province   | 2014 | Resident | NA           | 27-47 | 40% |      | NA            | 2 |
| ASIA | Southeast Asia | Thailand    | Mahidol Vivax Research Unit, Bangkok, Thailand                | 1   | Suan Pheung District, Ratchaburi Province | 2013 | Resident | NA           | 45    | 0%  |      | NA            | 2 |
| ASIA | Southeast Asia | Thailand    | Mahidol Vivax Research Unit, Bangkok, Thailand                | 3   | Suan Pheung District,                     | 2014 | Resident | NA           | 7-36  | 33% |      | NA            | 2 |

|            |                |                  |                                                                                                                                            |     |                   |           |          |              |    |    |     | Ratchaburi Province |   |
|------------|----------------|------------------|--------------------------------------------------------------------------------------------------------------------------------------------|-----|-------------------|-----------|----------|--------------|----|----|-----|---------------------|---|
| ASIA       | Southeast Asia | Vietnam          | WHO, Global Malaria Programme, Geneva, Switzerland                                                                                         | 177 | NA                | 2014      | Resident | NA           | NA | NA | 0%  | NA                  | 1 |
| OCEANIA    | Oceania        | Papua New Guinea | Centre National de Référence du Paludisme, Hôpital Bichat Claude-Bernard, Paris, France                                                    | 1   | NA                | 2013      | Traveler | Symptomatic  | NA | NA |     | NA                  | 2 |
| OCEANIA    | Oceania        | Papua New Guinea | Papua New Guinea Institute of Medical Research, Goroka, Papua New Guinea                                                                   | 1   | Chimbu            | 2013      | Resident | Asymptomatic | NA | NA |     | NA                  | 2 |
| OCEANIA    | Oceania        | Papua New Guinea | Papua New Guinea Institute of Medical Research, Goroka, Papua New Guinea                                                                   | 17  | East New Britain  | 2014      | Resident | Asymptomatic | NA | NA |     | NA                  | 2 |
| OCEANIA    | Oceania        | Papua New Guinea | Papua New Guinea Institute of Medical Research, Goroka, Papua New Guinea                                                                   | 7   | East Sepik        | 2014      | Resident | Asymptomatic | NA | NA |     | NA                  | 2 |
| OCEANIA    | Oceania        | Papua New Guinea | Papua New Guinea Institute of Medical Research, Goroka, Papua New Guinea                                                                   | 2   | Eastern Highlands | 2013      | Resident | Asymptomatic | NA | NA |     | NA                  | 2 |
| OCEANIA    | Oceania        | Papua New Guinea | Papua New Guinea Institute of Medical Research, Goroka, Papua New Guinea                                                                   | 1   | Enga              | 2013      | Resident | Asymptomatic | NA | NA |     | NA                  | 2 |
| OCEANIA    | Oceania        | Papua New Guinea | Papua New Guinea Institute of Medical Research, Goroka, Papua New Guinea                                                                   | 2   | Gulf              | 2014      | Resident | Asymptomatic | NA | NA | 74% | NA                  | 2 |
| OCEANIA    | Oceania        | Papua New Guinea | Papua New Guinea Institute of Medical Research, Goroka, Papua New Guinea                                                                   | 3   | Madang            | 2013      | Resident | Asymptomatic | NA | NA |     | NA                  | 2 |
| OCEANIA    | Oceania        | Papua New Guinea | Papua New Guinea Institute of Medical Research, Goroka, Papua New Guinea                                                                   | 1   | Manus             | 2013      | Resident | Asymptomatic | NA | NA |     | NA                  | 2 |
| OCEANIA    | Oceania        | Papua New Guinea | Papua New Guinea Institute of Medical Research, Goroka, Papua New Guinea                                                                   | 2   | Morobe            | 2013      | Resident | Asymptomatic | NA | NA |     | NA                  | 2 |
| OCEANIA    | Oceania        | Papua New Guinea | Papua New Guinea Institute of Medical Research, Goroka, Papua New Guinea                                                                   | 10  | New Ireland       | 2014      | Resident | Asymptomatic | NA | NA |     | NA                  | 2 |
| OCEANIA    | Oceania        | Papua New Guinea | Papua New Guinea Institute of Medical Research, Goroka, Papua New Guinea                                                                   | 4   | Oro               | 2014      | Resident | Asymptomatic | NA | NA |     | NA                  | 2 |
| OCEANIA    | Oceania        | Papua New Guinea | Papua New Guinea Institute of Medical Research, Goroka, Papua New Guinea                                                                   | 5   | West Sepik        | 2014      | Resident | Asymptomatic | NA | NA |     | NA                  | 2 |
| OCEANIA    | Oceania        | Solomon Islands  | Walter and Eliza Hall Institute of Medical Research, Melbourne, Australia / National Vector Borne Disease Control Program, Solomon Islands | 15  | Auki              | 2012-2013 | Resident | Symptomatic  | NA | NA |     | 1,200-160,000       | 2 |
| OCEANIA    | Oceania        | Solomon Islands  | Walter and Eliza Hall Institute of Medical Research, Melbourne, Australia / National Vector Borne Disease Control Program, Solomon Islands | 29  | Tetere            | 2012-2013 | Resident | Symptomatic  | NA | NA | 0%  | 2,526-241,600       | 2 |
| S. AMERICA | South America  | Brazil           | Fundação de Medicina Tropical, Manaus, Brazil                                                                                              | 30  | Manaus            | 1997      | Resident | Symptomatic  | NA | NA |     | NA                  | 1 |
| S. AMERICA | South America  | Brazil           | Fundação de Medicina Tropical, Manaus, Brazil                                                                                              | 29  | Manaus            | 2000      | Resident | Symptomatic  | NA | NA |     | NA                  | 1 |
| S. AMERICA | South America  | Brazil           | Fundação de Medicina Tropical, Manaus, Brazil                                                                                              | 3   | Manaus            | 2001      | Resident | Symptomatic  | NA | NA | 8%  | NA                  | 1 |
| S. AMERICA | South America  | Brazil           | Fundação de Medicina Tropical, Manaus, Brazil                                                                                              | 36  | Manaus            | 2003      | Resident | Symptomatic  | NA | NA |     | NA                  | 1 |
| S. AMERICA | South America  | Brazil           | Fundação de Medicina Tropical, Manaus, Brazil                                                                                              | 33  | Manaus            | 2009      | Resident | Symptomatic  | NA | NA |     | NA                  | 1 |



|            |               |               |                                                                                         |     |                         |      |          |              |       |       |      |               |   |
|------------|---------------|---------------|-----------------------------------------------------------------------------------------|-----|-------------------------|------|----------|--------------|-------|-------|------|---------------|---|
| S. AMERICA | South America | Brazil        | Fundação de Medicina Tropical, Manaus, Brazil                                           | 2   | Manaus                  | 2012 | Resident | Symptomatic  | NA    | NA    |      | NA            | 1 |
| S. AMERICA | South America | Brazil        | Fundação de Medicina Tropical, Manaus, Brazil                                           | 4   | Manaus                  | 2012 | Resident | Asymptomatic | NA    | NA    |      | NA            | 1 |
| S. AMERICA | South America | Brazil        | Fundação de Medicina Tropical, Manaus, Brazil                                           | 86  | Manaus                  | 2013 | Resident | Symptomatic  | NA    | NA    |      | NA            | 1 |
| S. AMERICA | South America | Brazil        | Fundação de Medicina Tropical, Manaus, Brazil                                           | 14  | Manaus                  | 2013 | Resident | Asymptomatic | NA    | NA    |      | NA            | 1 |
| S. AMERICA | South America | Colombia      | Caucaseco Scientific Reasearch Center, Cali, Colombia                                   | 99  | Quibdo                  | 2012 | Resident | Symptomatic  | 5-79  | 52%   |      | 4-127,008     | 2 |
| S. AMERICA | South America | Colombia      | Caucaseco Scientific Reasearch Center, Cali, Colombia                                   | 40  | Tierralta               | 2012 | Resident | Symptomatic  | 4-65  | 72.5% | 100% | 2-18,685      | 2 |
| S. AMERICA | South America | Colombia      | Caucaseco Scientific Reasearch Center, Cali, Colombia                                   | 396 | Tumaco                  | 2012 | Resident | Symptomatic  | 5-96  | 48.5% |      | 2-100,000     | 2 |
| S. AMERICA | South America | Ecuador       | Malaria Reference Laboratory, London, UK                                                | 1   | NA                      | 2014 | Traveler | Symptomatic  | NA    | NA    | 0%   | NA            | 3 |
| S. AMERICA | South America | French Guiana | Centre National de Référence du Paludisme, Hôpital Bichat Claude-Bernard, Paris, France | 5   | NA                      | 2013 | Traveler | Symptomatic  | 5-13  | NA    |      | NA            | 2 |
| S. AMERICA | South America | French Guiana | Institut Pasteur de la Guyane, Cayenne, French Guiana                                   | 96  | Cayenne                 | 2012 | Resident | Symptomatic  | 5-61  | 72%   |      | 50-840,000    | 2 |
| S. AMERICA | South America | French Guiana | Institut Pasteur de la Guyane, Cayenne, French Guiana                                   | 39  | Cayenne                 | 2013 | Resident | Symptomatic  | 5-57  | 69.2% |      | 50-695,000    | 2 |
| S. AMERICA | South America | French Guiana | Institut Pasteur de la Guyane, Cayenne, French Guiana                                   | 11  | Kourou                  | 2012 | Resident | Symptomatic  | 17-55 | 91%   |      | 1,000-50,000  | 2 |
| S. AMERICA | South America | French Guiana | Institut Pasteur de la Guyane, Cayenne, French Guiana                                   | 5   | Kourou                  | 2013 | Resident | Symptomatic  | 24-44 | 100%  |      | 5,000-20,000  | 2 |
| S. AMERICA | South America | French Guiana | Institut Pasteur de la Guyane, Cayenne, French Guiana                                   | 3   | Maripa-Soula            | 2012 | Resident | Symptomatic  | 29-36 | 66%   |      | 50-155,000    | 2 |
| S. AMERICA | South America | French Guiana | Institut Pasteur de la Guyane, Cayenne, French Guiana                                   | 11  | Maripa-Soula            | 2013 | Resident | Symptomatic  | 1-50  | 64%   | 97%  | 500-90,000    | 2 |
| S. AMERICA | South America | French Guiana | Institut Pasteur de la Guyane, Cayenne, French Guiana                                   | 1   | Papaïchton              | 2012 | Resident | Symptomatic  | 27    | 100%  |      | 24,000        | 2 |
| S. AMERICA | South America | French Guiana | Institut Pasteur de la Guyane, Cayenne, French Guiana                                   | 5   | Papaïchton              | 2013 | Resident | Symptomatic  | 25-37 | 80%   |      | 2,000-47,000  | 2 |
| S. AMERICA | South America | French Guiana | Institut Pasteur de la Guyane, Cayenne, French Guiana                                   | 3   | Rémire-Montjoly         | 2012 | Resident | Symptomatic  | 7-16  | 33%   |      | 1,600-85,000  | 2 |
| S. AMERICA | South America | French Guiana | Institut Pasteur de la Guyane, Cayenne, French Guiana                                   | 7   | Saint Laurent du Maroni | 2012 | Resident | Symptomatic  | 23-38 | 71.5% |      | 400-19,000    | 2 |
| S. AMERICA | South America | French Guiana | Institut Pasteur de la Guyane, Cayenne, French Guiana                                   | 12  | Saint Laurent du Maroni | 2013 | Resident | Symptomatic  | 16-40 | 42%   |      | 1,200-81,600  | 2 |
| S. AMERICA | South America | French Guiana | Institut Pasteur de la Guyane, Cayenne, French Guiana                                   | 4   | Saint-Georges           | 2012 | Resident | Symptomatic  | 16-37 | 100%  |      | 10,000-40,000 | 2 |
| S. AMERICA | South America | French Guiana | Institut Pasteur de la Guyane, Cayenne, French Guiana                                   | 1   | Saint-Georges           | 2013 | Resident | Symptomatic  | 43    | 100%  |      | 24,000        | 2 |
| S. AMERICA | South America | Peru          | Naval Medical Research Unit 6, Iquitos, Peru                                            | 51  | Loreto                  | 2012 | Resident | Symptomatic  | 6-72  | 54%   | 54%  | 71-49,800     | 3 |

|              |               |           |                                              |    |        |      |          |             |       |     |    |           |   |
|--------------|---------------|-----------|----------------------------------------------|----|--------|------|----------|-------------|-------|-----|----|-----------|---|
| S. AMERICA   | South America | Peru      | Naval Medical Research Unit 6, Iquitos, Peru | 24 | Loreto | 2013 | Resident | Symptomatic | 14-78 | 50% |    | 12-60,768 | 3 |
| S. AMERICA   | South America | Venezuela | Malaria Reference Laboratory, London, UK     | 1  | NA     | 2014 | Traveler | Symptomatic | NA    | NA  | 0% | NA        | 3 |
| <b>14037</b> |               |           |                                              |    |        |      |          |             |       | 56% |    |           |   |

**Table S5.** Full data set listing the number of tested samples, the number of samples with interpretable sequences, the number of samples with 3D7 non-reference allele sequences, the number of samples with non-synonymous or synonymous mutations, the number of polyclonal infections and the genetic diversity parameters (number of haplotypes, H; nucleotide diversity,  $\pi \times 10^{-3}$ ; haplotype diversity, Hd and Tajima's D test) detailed by continent, regions and country, KARMA study 2014

| Continent     | Region                | Country                      | No. Blood samples | Samples with interpretable sequences |              |             | Samples with non-reference 3D7 allele sequence |                 |             | Samples with non-synonymous mutations |                 |            | Samples with synonymous mutations |                 |            | No. polyclonal infections | No. sequences included in the genetic diversity analysis | H           | $\pi$ (SD) $\times 10^{-3}$ | Hd (SD)   | No. of allele with mutation detected as |              | Tajima's D test |
|---------------|-----------------------|------------------------------|-------------------|--------------------------------------|--------------|-------------|------------------------------------------------|-----------------|-------------|---------------------------------------|-----------------|------------|-----------------------------------|-----------------|------------|---------------------------|----------------------------------------------------------|-------------|-----------------------------|-----------|-----------------------------------------|--------------|-----------------|
|               |                       |                              |                   | No.                                  | %            | CI95%       | No.                                            | %               | CI95%       | No.                                   | %               | CI95%      | No.                               | %               | CI95%      |                           |                                                          |             |                             |           | S                                       | NS           |                 |
| <b>WORLD</b>  |                       |                              | <b>14037</b>      | <b>13157</b>                         | <b>93,7%</b> | <b>1250</b> | <b>9,5%</b>                                    | <b>8.8-9.9%</b> | <b>1087</b> | <b>8,3%</b>                           | <b>7.6-8.6%</b> | <b>174</b> | <b>1,3%</b>                       | <b>1.1-1.6%</b> | <b>111</b> | <b>13268</b>              | <b>186</b>                                               | <b>0,26</b> | <b>0,1824 (0,0045)</b>      | <b>58</b> | <b>88</b>                               | <b>1,032</b> |                 |
| <b>AFRICA</b> |                       |                              | <b>10207</b>      | <b>9434</b>                          | <b>92,4%</b> | <b>287</b>  | <b>3,0%</b>                                    | <b>2.7-3.5%</b> | <b>128</b>  | <b>1,4%</b>                           | <b>1.1-1.6%</b> | <b>169</b> | <b>1,8%</b>                       | <b>1.5-2.1%</b> | <b>108</b> | <b>9542</b>               | <b>150</b>                                               | <b>0,09</b> | <b>0,0661 (0,0036)</b>      | <b>58</b> | <b>61</b>                               | <b>1,006</b> |                 |
| <b>AFRICA</b> | <b>Central Africa</b> |                              | <b>3276</b>       | <b>3072</b>                          | <b>93,8%</b> | <b>97</b>   | <b>3,2%</b>                                    | <b>2.7-4.0%</b> | <b>49</b>   | <b>1,6%</b>                           | <b>1.2-2.2%</b> | <b>56</b>  | <b>1,8%</b>                       | <b>1.4-2.5%</b> | <b>44</b>  | <b>3116</b>               | <b>70</b>                                                | <b>0,10</b> | <b>0,072 (0,006)</b>        | <b>30</b> | <b>39</b>                               | <b>1,041</b> |                 |
| AFRICA        | Central Africa        | Cameroon                     | 911               | 901                                  | 98,9%        | 26          | 2,9%                                           | 1.9-4.2%        | 11          | 1,2%                                  | 0.6-2.2%        | 17         | 1,9%                              | 1.1-3.0%        | 10         | 911                       | 19                                                       | 0,09        | 0,061 (0,011)               | 11        | 7                                       | 0,877        |                 |
| AFRICA        | Central Africa        | Central African Republic     | 469               | 423                                  | 90,2%        | 28          | 6,6%                                           | 4.6-9.8%        | 19          | 4,5%                                  | 2.7-7.0%        | 14         | 3,3%                              | 1.8-5.5%        | 21         | 444                       | 40                                                       | 0,27        | 0,184 (0,025)               | 15        | 24                                      | 1,090        |                 |
| AFRICA        | Central Africa        | Chad                         | 33                | 33                                   | 100,0%       | 2           | 6,1%                                           | 0.7-21.9%       | 1           | 3,0%                                  | 0.1-16.9%       | 1          | 3,0%                              | 0.1-16.9%       | 0          | 33                        | 3                                                        | 0,17        | 0,119 (0,076)               | 1         | 1                                       | 1,000        |                 |
| AFRICA        | Central Africa        | Congo                        | 72                | 71                                   | 98,6%        | 2           | 2,8%                                           | 0.3-10.2%       | 0           | 0,0%                                  | 0-5.2%          | 2          | 2,8%                              | 0.3-10.2%       | 1          | 72                        | 3                                                        | 0,08        | 0,055 (0,037)               | 2         | 0                                       | -            |                 |
| AFRICA        | Central Africa        | Democratic Republic of Congo | 1288              | 1230                                 | 95,5%        | 32          | 2,6%                                           | 2.5-2.7%        | 14          | 1,1%                                  | 1.1-1.2%        | 18         | 1,5%                              | 1.4-1.5%        | 11         | 1241                      | 21                                                       | 0,07        | 0,052 (0,009)               | 10        | 10                                      | 1,003        |                 |
| AFRICA        | Central Africa        | Equatorial Guinea            | 7                 | 7                                    | 100,0%       | 1           | 14,3%                                          | 0.4-79.6%       | 0           | 0,0%                                  | 0-52.7%         | 1          | 14,3%                             | 0.4-79.6%       | 1          | 8                         | 2                                                        | 0,35        | 0,250 (0,180)               | 1         | 0                                       | -            |                 |
| AFRICA        | Central Africa        | Gabon                        | 496               | 407                                  | 82,1%        | 6           | 1,5%                                           | 0.5-3.2%        | 4           | 1,0%                                  | 0.3-2.5%        | 3          | 0,7%                              | 0.2-2.1%        | 0          | 407                       | 6                                                        | 0,04        | 0,029 (0,012)               | 1         | 4                                       | 1,842        |                 |
| <b>AFRICA</b> | <b>Eastern Africa</b> |                              | <b>1360</b>       | <b>1314</b>                          | <b>96,6%</b> | <b>30</b>   | <b>2,3%</b>                                    | <b>1.5-3.2%</b> | <b>13</b>   | <b>1,0%</b>                           | <b>0.5-1.7%</b> | <b>17</b>  | <b>1,3%</b>                       | <b>0.7-2.1%</b> | <b>11</b>  | <b>1325</b>               | <b>20</b>                                                | <b>0,07</b> | <b>0,049 (0,008)</b>        | <b>12</b> | <b>7</b>                                | <b>0,849</b> |                 |
| AFRICA        | East Africa           | Burundi                      | 1                 | 1                                    | 100,0%       | 0           | 0,0%                                           | -               | 0           | 0,0%                                  | -               | 0          | 0,0%                              | -               | 0          | 1                         | 1                                                        | -           | -                           | 0         | 0                                       | -            |                 |
| AFRICA        | East Africa           | Ethiopia                     | 146               | 126                                  | 86,3%        | 0           | 0,0%                                           | 0-2.9%          | 0           | 0,0%                                  | 0-2.9%          | 0          | 0,0%                              | 0-2.9%          | 0          | 126                       | 1                                                        | -           | -                           | 0         | 0                                       | -            |                 |
| AFRICA        | East Africa           | Kenya                        | 198               | 184                                  | 92,9%        | 8           | 4,3%                                           | 1.9-8.6%        | 6           | 3,3%                                  | 1.2-7.1%        | 2          | 1,1%                              | 0.1-3.9%        | 4          | 188                       | 5                                                        | 0,13        | 0,093 (0,029)               | 2         | 2                                       | 0,839        |                 |
| AFRICA        | East Africa           | Rwanda                       | 293               | 292                                  | 99,7%        | 11          | 3,8%                                           | 1.9-6.7%        | 4           | 1,4%                                  | 0.4-3.5%        | 7          | 2,4%                              | 1.0-4.9%        | 5          | 297                       | 12                                                       | 0,12        | 0,086 (0,023)               | 6         | 5                                       | 0,957        |                 |
| AFRICA        | East Africa           | Sudan                        | 5                 | 5                                    | 100,0%       | 0           | 0,0%                                           | -               | 0           | 0,0%                                  | -               | 0          | 0,0%                              | -               | 0          | 5                         | 1                                                        | -           | -                           | 0         | 0                                       | -            |                 |
| AFRICA        | East Africa           | South Sudan                  | 1                 | 1                                    | 100,0%       | 0           | 0,0%                                           | -               | 0           | 0,0%                                  | -               | 0          | 0,0%                              | -               | 0          | 1                         | 1                                                        | -           | -                           | 0         | 0                                       | -            |                 |
| AFRICA        | East Africa           | Somalia                      | 186               | 186                                  | 100,0%       | 0           | 0,0%                                           | 0-2.0%          | 0           | 0,0%                                  | 0-2.0%          | 0          | 0,0%                              | 0-2.0%          | 0          | 186                       | 1                                                        | -           | -                           | 0         | 0                                       | -            |                 |
| AFRICA        | East Africa           | Tanzania                     | 236               | 236                                  | 100,0%       | 0           | 0,0%                                           | 0-1.6%          | 0           | 0,0%                                  | 0-1.6%          | 0          | 0,0%                              | 0-1.6%          | 0          | 236                       | 1                                                        | -           | -                           | 0         | 0                                       | -            |                 |
| AFRICA        | East Africa           | Uganda                       | 294               | 283                                  | 96,3%        | 11          | 3,9%                                           | 1.9-6.7%        | 3           | 1,1%                                  | 0.2-3.1%        | 8          | 2,8%                              | 1.2-5.6%        | 2          | 285                       | 9                                                        | 0,11        | 0,076 (0,022)               | 7         | 1                                       | 0,431        |                 |

|               |                        |               |             |             |              |            |              |                   |            |              |                   |           |             |                 |           |             |           |             |                      |           |           |              |
|---------------|------------------------|---------------|-------------|-------------|--------------|------------|--------------|-------------------|------------|--------------|-------------------|-----------|-------------|-----------------|-----------|-------------|-----------|-------------|----------------------|-----------|-----------|--------------|
| <b>AFRICA</b> | <b>Indian Ocean</b>    |               | <b>631</b>  | <b>608</b>  | <b>96,4%</b> | <b>20</b>  | <b>3,3%</b>  | <b>2.0-5.1%</b>   | <b>14</b>  | <b>2,3%</b>  | <b>1.2-3.9%</b>   | <b>6</b>  | <b>1,0%</b> | <b>0.4-2.1%</b> | <b>5</b>  | <b>613</b>  | <b>13</b> | <b>0,11</b> | <b>0,08 (0,015)</b>  | <b>3</b>  | <b>9</b>  | <b>1,480</b> |
| AFRICA        | Indian Ocean           | Comoros       | 354         | 352         | 99,4%        | 14         | 4,0%         | 2.2-6.7%          | 13         | 3,7%         | 2.0-6.3%          | 1         | 0,3%        | 0-1.6%          | 4         | 356         | 11        | 0,00        | 0,098 (0,022)        | 2         | 8         | 1,579        |
| AFRICA        | Indian Ocean           | Madagascar    | 277         | 256         | 92,4%        | 6          | 2,3%         | 0.8-5.1%          | 1          | 0,4%         | 0-2.2%            | 5         | 2,0%        | 0.6-4.6%        | 1         | 257         | 4         | 0,00        | 0,054 (0,019)        | 2         | 1         | 0,819        |
| <b>AFRICA</b> | <b>Southern Africa</b> |               | <b>365</b>  | <b>344</b>  | <b>94,2%</b> | <b>22</b>  | <b>6,4%</b>  | <b>4.0-9.7%</b>   | <b>13</b>  | <b>3,8%</b>  | <b>2.0-6.5%</b>   | <b>10</b> | <b>2,9%</b> | <b>1.4-5.3%</b> | <b>15</b> | <b>359</b>  | <b>24</b> | <b>0,19</b> | <b>0,135 (0,025)</b> | <b>9</b>  | <b>14</b> | <b>1,120</b> |
| AFRICA        | Southern Africa        | Angola        | 34          | 34          | 100,0%       | 0          | 0,0%         | 0-10.8%           | 0          | 0,0%         | 0-10.8%           | 0         | 0,0%        | 0-10.8%         | 1         | 35          | 1         | -           | -                    | 0         | 0         | -            |
| AFRICA        | Southern Africa        | Malawi        | 13          | 13          | 100,0%       | 1          | 7,7%         | 0.2-42.8%         | 0          | 0,0%         | 0-28.4%           | 1         | 7,7%        | 0.2-42.8%       | 0         | 13          | 2         | 0,21        | 0,154 (0,126)        | 1         | 0         | -            |
| AFRICA        | Southern Africa        | Mozambique    | 5           | 5           | 100,0%       | 0          | 0,0%         | -                 | 0          | 0,0%         | -                 | 0         | 0,0%        | -               | 0         | 5           | 1         | -           | -                    | 0         | 0         | -            |
| AFRICA        | Southern Africa        | South Africa  | 2           | 2           | 100,0%       | 0          | 0,0%         | -                 | 0          | 0,0%         | -                 | 0         | 0,0%        | -               | 0         | 2           | 1         | -           | -                    | 0         | 0         | -            |
| AFRICA        | Southern Africa        | Zambia        | 304         | 283         | 93,1%        | 20         | 7,1%         | 4.3-10.9%         | 13         | 4,6%         | 2.4-7.8%          | 8         | 2,8%        | 1.2-5.6%        | 14        | 297         | 24        | 0,22        | 0,149 (0,029)        | 9         | 14        | 1,109        |
| AFRICA        | Southern Africa        | Zimbabwe      | 7           | 7           | 100,0%       | 1          | 14,3%        | 0.3-79.6%         | 0          | 0,0%         | 0-52.7%           | 1         | 14,3%       | 0.3-79.6%       | 0         | 7           | 2         | 0,40        | 0,286 (0,196)        | 1         | 0         | -            |
| <b>AFRICA</b> | <b>Western Africa</b>  |               | <b>4575</b> | <b>4096</b> | <b>89,5%</b> | <b>118</b> | <b>2,9%</b>  |                   | <b>39</b>  | <b>1,0%</b>  |                   | <b>80</b> | <b>2,0%</b> |                 | <b>33</b> | <b>4129</b> | <b>59</b> | <b>0,08</b> | <b>0,059 (0,005)</b> | <b>31</b> | <b>21</b> | <b>0,934</b> |
| AFRICA        | West Africa            | Benin         | 265         | 234         | 88,3%        | 13         | 5,6%         | 2.9-9.5%          | 2          | 0,9%         | 0.1-3.1%          | 11        | 4,7%        | 2.3-8.4%        | 1         | 235         | 8         | 0,15        | 0,107 (0,028)        | 5         | 2         | 0,757        |
| AFRICA        | West Africa            | Burkina Faso  | 612         | 589         | 96,2%        | 14         | 2,4%         | 1.3-4.0%          | 2          | 0,3%         | 0-1.3%            | 12        | 2,0%        | 1.0-3.6%        | 0         | 589         | 11        | 0,07        | 0,047 (0,012)        | 8         | 2         | 0,610        |
| AFRICA        | West Africa            | Gambia        | 12          | 12          | 100,0%       | 1          | 8,3%         | -                 | 1          | 8,3%         | -                 | 0         | 0,0%        | -               | 0         | 12          | 2         | 0,23        | 0,167 (0,134)        | 0         | 1         | -            |
| AFRICA        | West Africa            | Ghana         | 37          | 37          | 100,0%       | 0          | 0,0%         | 0-10.0%           | 0          | 0,0%         | 0-10.0%           | 0         | 0,0%        | 0-10.0%         | 0         | 37          | 1         | -           | -                    | 0         | 0         | -            |
| AFRICA        | West Africa            | Guinea        | 87          | 86          | 98,9%        | 4          | 4,7%         | 1.2-11.8%         | 3          | 3,5%         | 0.7-10.1%         | 1         | 1,2%        | 0-6.4%          | 0         | 86          | 5         | 0,13        | 0,091 (0,043)        | 1         | 3         | 1,559        |
| AFRICA        | West Africa            | Guinea Bissau | 3           | 3           | 100,0%       | 0          | 0,0%         | -                 | 0          | 0,0%         | -                 | 0         | 0,0%        | -               | 0         | 3           | 1         | -           | -                    | 0         | 0         | -            |
| AFRICA        | West Africa            | Ivory Coast   | 1157        | 1083        | 93,6%        | 33         | 3,0%         | 2.1-4.3%          | 10         | 0,9%         | 0.4-1.7%          | 24        | 2,2%        | 1.4-3.3%        | 13        | 1096        | 28        | 0,09        | 0,065 (0,010)        | 15        | 12        | 0,954        |
| AFRICA        | West Africa            | Liberia       | 1           | 1           | 100,0%       | 0          | 0,0%         | -                 | 0          | 0,0%         | -                 | 0         | 0,0%        | -               | 0         | 1           | 1         | -           | -                    | 0         | 0         | -            |
| AFRICA        | West Africa            | Mali          | 467         | 465         | 99,6%        | 7          | 1,5%         | 0.6-3.1%          | 2          | 0,4%         | 0-1.6%            | 5         | 1,1%        | 0.3-2.5%        | 5         | 470         | 8         | 0,04        | 0,030 (0,011)        | 6         | 1         | 0,487        |
| AFRICA        | West Africa            | Mauritania    | 1           | 1           | 100,0%       | 0          | 0,0%         | -                 | 0          | 0,0%         | -                 | 0         | 0,0%        | -               | 0         | 1           | 1         | -           | -                    | 0         | 0         | -            |
| AFRICA        | West Africa            | Niger         | 776         | 521         | 67,1%        | 22         | 4,2%         | 2.6-6.4%          | 7          | 1,3%         | 0.5-2.8%          | 15        | 2,9%        | 1.6-4.7%        | 11        | 532         | 16        | 0,12        | 0,088 (0,017)        | 9         | 6         | 0,889        |
| AFRICA        | West Africa            | Nigeria       | 299         | 273         | 91,3%        | 7          | 2,6%         | 1.0-5.3%          | 3          | 1,1%         | 0.2-3.2%          | 4         | 1,5%        | 0.4-3.8%        | 3         | 276         | 7         | 0,07        | 0,05 (0,018)         | 3         | 3         | 1,015        |
| AFRICA        | West Africa            | Senegal       | 313         | 246         | 78,6%        | 2          | 0,8%         | 0.1-2.9%          | 0          | 0,0%         | 0-1.5%            | 2         | 0,8%        | 0.1-2.9%        | 0         | 246         | 3         | 0,02        | 0,016 (0,011)        | 2         | 0         | -            |
| AFRICA        | West Africa            | Sierra Leone  | 37          | 37          | 100,0%       | 0          | 0,0%         | 0-10.0%           | 0          | 0,0%         | 0-10.0%           | 0         | 0,0%        | 0-10.0%         | 0         | 37          | 1         | -           | -                    | 0         | 0         | -            |
| AFRICA        | West Africa            | Togo          | 508         | 508         | 100,0%       | 15         | 3,0%         | 1.6-4.9%          | 9          | 1,8%         | 0.8-3.4%          | 6         | 1,2%        | 0.4-2.6%        | 0         | 508         | 10        | 0,08        | 0,058 (0,015)        | 5         | 4         | 0,897        |
| <b>ASIA</b>   |                        |               | <b>2678</b> | <b>2623</b> | <b>97,9%</b> | <b>960</b> | <b>36,6%</b> | <b>33.9-38.7%</b> | <b>957</b> | <b>36,5%</b> | <b>33.8-38.6%</b> | <b>4</b>  | <b>0,2%</b> | <b>0-0.4%</b>   | <b>3</b>  | <b>2626</b> | <b>45</b> | <b>0,86</b> | <b>0,543 (0,009)</b> | <b>3</b>  | <b>41</b> | <b>1,795</b> |
| <b>ASIA</b>   | <b>Central Asia</b>    |               | <b>140</b>  | <b>138</b>  | <b>98,6%</b> | <b>3</b>   | <b>2,2%</b>  | <b>0-6.4%</b>     | <b>3</b>   | <b>2,2%</b>  | <b>0-6.4%</b>     | <b>0</b>  | <b>0,0%</b> | <b>-</b>        | <b>0</b>  | <b>138</b>  | <b>4</b>  | <b>0,06</b> | <b>0,043 (0,024)</b> | <b>0</b>  | <b>3</b>  | <b>-</b>     |
| ASIA          | Central Asia           | Afghanistan   | 62          | 62          | 100,0%       | 1          | 1,6%         | 0-9.0%            | 1          | 1,6%         | 0-9.0%            | 0         | 0,0%        | -               | 0         | 62          | 2         | 0,04        | 0,032 (0,031)        | 0         | 1         | -            |
| ASIA          | Central Asia           | Iran          | 78          | 76          | 97,4%        | 2          | 2,6%         | 0-9.5%            | 2          | 2,6%         | 0-9.5%            | 0         | 0,0%        | -               | 0         | 76          | 3         | 0,07        | 0,052 (0,035)        | 0         | 2         | -            |
| <b>ASIA</b>   | <b>East Asia</b>       |               | <b>563</b>  | <b>558</b>  | <b>99,1%</b> | <b>217</b> | <b>38,9%</b> | <b>38.4-39.4%</b> | <b>216</b> | <b>38,7%</b> | <b>38.2-39.2%</b> | <b>1</b>  | <b>0,2%</b> | <b>0-1.0%</b>   | <b>0</b>  | <b>558</b>  | <b>19</b> | <b>0,87</b> | <b>0,551 (0,018)</b> | <b>1</b>  | <b>17</b> | <b>2,073</b> |
| ASIA          | East Asia              | China         | 216         | 215         | 99,5%        | 56         | 26,0%        | 19.7-33.8%        | 55         | 25,6%        | 19.3-33.3%        | 1         | 0,5%        | 0-2.6%          | 0         | 215         | 11        | 0,64        | 0,423 (0,037)        | 1         | 9         | 1,677        |
| ASIA          | East Asia              | Myanmar       | 347         | 343         | 98,8%        | 161        | 46,9%        | 46.2-47.7%        | 161        | 46,9%        | 46.2-47.7%        | 0         | 0,0%        | 0-1.1%          | 0         | 343         | 14        | 0,99        | 0,605 (0,019)        | 0         | 13        | -            |
| <b>ASIA</b>   | <b>South Asia</b>      |               | <b>357</b>  | <b>340</b>  | <b>95,2%</b> | <b>3</b>   | <b>0,9%</b>  | <b>0-2.6%</b>     | <b>3</b>   | <b>0,9%</b>  | <b>0-2.6%</b>     | <b>0</b>  | <b>0,0%</b> | <b>0-1.1%</b>   | <b>0</b>  | <b>340</b>  | <b>5</b>  | <b>0,03</b> | <b>0,023 (0,012)</b> | <b>0</b>  | <b>4</b>  | <b>-</b>     |

|                   |                       |                  |             |             |              |            |              |                   |            |              |                   |          |             |               |          |             |           |              |                      |          |           |              |
|-------------------|-----------------------|------------------|-------------|-------------|--------------|------------|--------------|-------------------|------------|--------------|-------------------|----------|-------------|---------------|----------|-------------|-----------|--------------|----------------------|----------|-----------|--------------|
| ASIA              | South Asia            | Bangladesh       | 333         | 318         | 95,5%        | 3          | 0,9%         | 0-2.7%            | 3          | 0,9%         | 0-2.7%            | 0        | 0,0%        | 0-1.2%        | 0        | 318         | 5         | 0,03         | 0,025 (0,012)        | 0        | 4         | -            |
| ASIA              | South Asia            | Nepal            | 24          | 22          | 91,7%        | 0          | 0,0%         | 0-16.8%           | 0          | 0,0%         | 0-16.8%           | 0        | 0,0%        | 0-16.8%       | 0        | 22          | 1         | -            | -                    | 0        | 0         | -            |
| <b>ASIA</b>       | <b>Southeast Asia</b> |                  | <b>1618</b> | <b>1587</b> | <b>98,1%</b> | <b>737</b> | <b>46,4%</b> | <b>43.1-50.0%</b> | <b>735</b> | <b>46,3%</b> | <b>43.0-49.8%</b> | <b>3</b> | <b>0,2%</b> | <b>0-0.6%</b> | <b>3</b> | <b>1590</b> | <b>27</b> | <b>0,89</b>  | <b>0,571 (0,007)</b> | <b>3</b> | <b>23</b> | <b>1,462</b> |
| ASIA              | Southeast Asia        | Cambodia         | 882         | 882         | 100,0%       | 586        | 66,4%        | 61.2-72.0%        | 586        | 66,4%        | 61.2-72.0%        | 0        | 0,0%        | -             | 0        | 882         | 13        | 0,89         | 0,545 (0,012)        | 0        | 12        | -            |
| ASIA              | Southeast Asia        | Indonesia        | 110         | 106         | 96,4%        | 1          | 0,9%         | 0-5.2%            | 1          | 0,9%         | 0-5.2%            | 0        | 0,0%        | 0-3.5%        | 0        | 106         | 2         | 0,03         | 0,019 (0,018)        | 0        | 1         | -            |
| ASIA              | Southeast Asia        | Lao PDR          | 122         | 120         | 98,4%        | 25         | 20,8%        | 13.5-30.7%        | 24         | 20,0%        | 13.0-30.0%        | 1        | 0,8%        | 0-4.6%        | 1        | 121         | 5         | 0,52         | 0,351 (0,051)        | 1        | 3         | 0,628        |
| ASIA              | Southeast Asia        | Philippines      | 120         | 99          | 82,5%        | 1          | 1,0%         | 0-5.6%            | 0          | 0,0%         | -                 | 1        | 1,0%        | 0-5.6%        | 0        | 99          | 2         | 0,03         | 0,02 (0,020)         | 1        | 0         | -            |
| ASIA              | Southeast Asia        | Thailand         | 207         | 205         | 99,0%        | 54         | 26,3%        | 19.8-34.4%        | 54         | 26,3%        | 19.8-34.4%        | 0        | 0,0%        | -             | 0        | 205         | 7         | 0,65         | 0,43 (0,039)         | 0        | 6         | -            |
| ASIA              | Southeast Asia        | Vietnam          | 177         | 175         | 98,9%        | 70         | 40,0%        | 31.0-50.5%        | 69         | 39,4%        | 31.0-50.0%        | 1        | 0,6%        | 0-3.2%        | 2        | 177         | 11        | 1,00         | 0,606 (0,036)        | 1        | 9         | 1,613        |
| <b>OCEANIA</b>    |                       |                  | <b>100</b>  | <b>86</b>   | <b>86,0%</b> | <b>2</b>   | <b>2,3%</b>  | <b>0-8.4%</b>     | <b>1</b>   | <b>1,2%</b>  | <b>0-6.4%</b>     | <b>1</b> | <b>1,2%</b> | <b>0-6.4%</b> | <b>0</b> | <b>86</b>   | <b>3</b>  | <b>0,06</b>  | <b>0,046 (0,031)</b> | <b>1</b> | <b>1</b>  | <b>1,000</b> |
| OCEANIA           | Oceania               | Papua New Guinea | 56          | 43          | 76,8%        | 1          | 2,3%         | 0-12.9%           | 0          | 0,0%         | -                 | 1        | 2,3%        | -             | 0        | 43          | 2         | 0,06         | 0,047 (0,044)        | 1        | 0         | -            |
| OCEANIA           | Oceania               | Solomon Islands  | 44          | 43          | 97,7%        | 1          | 2,3%         | 0-12.9%           | 1          | 2,3%         | -                 | 0        | 0,0%        | -             | 0        | 43          | 2         | 0,06         | 0,047 (0,044)        | 0        | 1         | -            |
| <b>S. AMERICA</b> |                       |                  | <b>1052</b> | <b>1014</b> | <b>96,4%</b> | <b>1</b>   | <b>0,1%</b>  | <b>0-0.5%</b>     | <b>1</b>   | <b>0,1%</b>  | <b>0-0.5%</b>     | <b>0</b> | <b>0,0%</b> | <b>-</b>      | <b>0</b> | <b>1014</b> | <b>2</b>  | <b>0,003</b> | <b>0,002 (0,002)</b> | <b>0</b> | <b>1</b>  | <b>-</b>     |
| S. AMERICA        | South America         | Brazil           | 237         | 237         | 100,0%       | 1          | 0,4%         | 0-2.3%            | 1          | 0,4%         | 0-2.3%            | 0        | 0,0%        | -             | 0        | 237         | 2         | 0,01         | 0,008 (0,008)        | 0        | 1         | -            |
| S. AMERICA        | South America         | Colombia         | 535         | 523         | 97,8%        | 0          | 0,0%         | 0-0.7%            | 0          | 0,0%         | 0-0.7%            | 0        | 0,0%        | -             | 0        | 523         | 1         | -            | -                    | 0        | 0         | -            |
| S. AMERICA        | South America         | Ecuador          | 1           | 1           | 100,0%       | 0          | 0,0%         | -                 | 0          | 0,0%         | -                 | 0        | 0,0%        | -             | 0        | 1           | 1         | -            | -                    | 0        | 0         | -            |
| S. AMERICA        | South America         | French Guiana    | 203         | 183         | 90,1%        | 0          | 0,0%         | 0-2.0%            | 0          | 0,0%         | 0-2.0%            | 0        | 0,0%        | -             | 0        | 183         | 1         | -            | -                    | 0        | 0         | -            |
| S. AMERICA        | South America         | Peru             | 75          | 69          | 92,0%        | 0          | 0,0%         | 0-5.3%            | 0          | 0,0%         | 0-5.3%            | 0        | 0,0%        | -             | 0        | 69          | 1         | -            | -                    | 0        | 0         | -            |
| S. AMERICA        | South America         | Venezuela        | 1           | 1           | 100,0%       | 0          | 0,0%         | -                 | 0          | 0,0%         | -                 | 0        | 0,0%        | -             | 0        | 1           | 1         | -            | -                    | 0        | 0         | -            |

**Table S6.** List of the most frequent NS-mutations (private mutants observed once are excluded) ranked by their relative frequency and their distribution by continent and country, KARMA study 2014.

| NS-mutation | No. of samples |               | by continents |         |               |                                                                                                                                                                                                      | by countries (No. of samples) |
|-------------|----------------|---------------|---------------|---------|---------------|------------------------------------------------------------------------------------------------------------------------------------------------------------------------------------------------------|-------------------------------|
|             | Total (%)      | by continents |               |         |               |                                                                                                                                                                                                      |                               |
|             |                | Africa        | Asia          | Oceania | South America |                                                                                                                                                                                                      |                               |
| C580Y*      | 602 (54.9%)    | -             | 602           | -       | -             | Cambodia (515), Vietnam (34), Thailand (33), Lao PDR (17), Myanmar (3)                                                                                                                               |                               |
| F446I*      | 154 (14.0%)    | -             | 154           | -       | -             | Myanmar (116), China (38)                                                                                                                                                                            |                               |
| R539T*      | 43 (3.9%)      | -             | 43            | -       | -             | Cambodia (35), Lao PDR (6), Myanmar (2)                                                                                                                                                              |                               |
| A578S       | 42 (3.8%)      | 41            | 1             | -       | -             | Thailand (1), Benin (1), Burkina Faso (1), Cameroon (4), CAR (1), Chad (1), Comoros (7), Congo DR (3), Guinea (2), Ivory Coast (3), Kenya (5), Mali (1), Niger (4), Togo (4), Uganda (3), Zambia (1) |                               |
| Y493H*      | 32 (2.9%)      | -             | 32            | -       | -             | Cambodia (24), Vietnam (8)                                                                                                                                                                           |                               |
| P574L*      | 23 (2.1%)      | -             | 23            | -       | -             | Myanmar (10), Thailand (9), China (4)                                                                                                                                                                |                               |
| P553L*      | 21 (1.9%)      | -             | 21            | -       | -             | China (3), Myanmar (3), Cambodia (2), Thailand (1), Vietnam (12)                                                                                                                                     |                               |
| N458Y*      | 16 (1.5%)      | -             | 16            | -       | -             | Myanmar (8), Thailand (8)                                                                                                                                                                            |                               |
| R561H       | 14 (1.3%)      | 1             | 13            | -       | -             | Myanmar (13), Congo DR (1)                                                                                                                                                                           |                               |
| I543T*      | 8 (0.7%)       | -             | 8             | -       | -             | Cambodia (1), Vietnam (7)                                                                                                                                                                            |                               |
| S522C       | 7 (0.6%)       | 7             | -             | -       | -             | CAR (1), Congo DR (1), Gabon (1), Kenya (1), Togo (3)                                                                                                                                                |                               |
| V589I       | 6 (0.5%)       | 6             | -             | -       | -             | Benin (1), Burkina Faso (1), Cameroon (1), CAR (1), Kenya (1), Madagascar (1)                                                                                                                        |                               |
| A481V       | 4 (0.4%)       | -             | 3             | -       | 1             | China (3), Brazil (1)                                                                                                                                                                                |                               |
| V534A       | 3 (0.3%)       | 3             | -             | -       | -             | Congo DR (3)                                                                                                                                                                                         |                               |
| F583L       | 3 (0.3%)       | 3             | -             | -       | -             | CAR (1), Ivory Coast (1), Zambia (1)                                                                                                                                                                 |                               |
| G665S       | 3 (0.3%)       | 3             | -             | -       | -             | Cameroon (1), Guinea (1), Nigeria (1)                                                                                                                                                                |                               |
| K503N       | 3 (0.3%)       | -             | 3             | -       | -             | Vietnam (3)                                                                                                                                                                                          |                               |
| D584V       | 3 (0.3%)       | -             | 3             | -       | -             | Cambodia (3)                                                                                                                                                                                         |                               |
| C469Y       | 3 (0.3%)       | -             | 3             | -       | -             | Myanmar (1), China (2)                                                                                                                                                                               |                               |
| F495L       | 2 (0.2%)       | 1             | 1             | -       | -             | Myanmar (1), Comoros (1)                                                                                                                                                                             |                               |
| G592R       | 2 (0.2%)       | 1             | -             | 1       | -             | Nigeria, Salomon Islands                                                                                                                                                                             |                               |
| Y482S       | 2 (0.2%)       | 2             | -             | -       | -             | Cameroon (2)                                                                                                                                                                                         |                               |
| I552M       | 2 (0.2%)       | 2             | -             | -       | -             | CAR (2)                                                                                                                                                                                              |                               |
| Q613E       | 2 (0.2%)       | 2             | -             | -       | -             | Congo DR (2)                                                                                                                                                                                         |                               |
| D641G       | 2 (0.2%)       | 2             | -             | -       | -             | CAR (2)                                                                                                                                                                                              |                               |
| C532S       | 2 (0.2%)       | 2             | -             | -       | -             | Ivory Coast (1), Togo (1)                                                                                                                                                                            |                               |
| A557S       | 2 (0.2%)       | 2             | -             | -       | -             | Congo DR (1), Togo (1)                                                                                                                                                                               |                               |
| E596K       | 2 (0.2%)       | 2             | -             | -       | -             | Congo DR (1), Zambia (1)                                                                                                                                                                             |                               |
| T474I       | 2 (0.2%)       | -             | 2             | -       | -             | Vietnam (2)                                                                                                                                                                                          |                               |
| F483S       | 2 (0.2%)       | -             | 2             | -       | -             | China (2)                                                                                                                                                                                            |                               |
| P527H       | 2 (0.2%)       | -             | 2             | -       | -             | Thailand (2)                                                                                                                                                                                         |                               |
| V568G*      | 2 (0.2%)       | -             | 2             | -       | -             | Vietnam (2)                                                                                                                                                                                          |                               |
| E605K       | 2 (0.2%)       | -             | 2             | -       | -             | Vietnam (1), China (1)                                                                                                                                                                               |                               |
| L492S       | 2 (0.2%)       | -             | 2             | -       | -             | Myanmar (1), China (1)                                                                                                                                                                               |                               |
| V510M       | 2 (0.2%)       | 1             | 1             | -       | -             | Bangladesh (1), Ivory Coast (1)                                                                                                                                                                      |                               |
| N537D       | 2 (0.2%)       | 1             | 1             | -       | -             | China (1), CAR (1)                                                                                                                                                                                   |                               |

Continent-shared mutants are highlighted in orange, inter-Asian country-shared mutants in green, intra-Asian country-shared mutants in pale green, inter-African country-shared mutants in blue and intra-African country-shared mutants in pale blue.

\* C580Y, Y493H, R539T, I543T are validated/confirmed artemisinin resistance mutations; F446I, P441L, N458Y, P553L, V568G, P574L are associated with clinical artemisinin resistance<sup>9,20,26,31,42</sup> (see reference 28).

























3-digit country codes are provided in the next sheet

| <b>Country Name</b>          | <b>Country Code</b> | <b>Country Name</b> | <b>Country Code</b> | <b>Country Name</b> | <b>Country Code</b> |
|------------------------------|---------------------|---------------------|---------------------|---------------------|---------------------|
| Afghanistan                  | AFG                 | Gabon               | GAB                 | Nigeria             | NGA                 |
| Angola                       | AGO                 | Gambia              | GMB                 | Papua New Guinea    | PNG                 |
| Bangladesh                   | BGD                 | Ghana               | GHA                 | Peru                | PER                 |
| Benin                        | BEN                 | Guinea              | GIN                 | Philippines         | PHL                 |
| Brazil                       | BRA                 | Guinea Bissau       | GNB                 | Rwanda              | RWA                 |
| Burkina Faso                 | BFA                 | Indonesia           | IDN                 | Senegal             | SEN                 |
| Burundi                      | BDI                 | Iran                | IRN                 | Sierra Leone        | SLE                 |
| Cambodia                     | KHM                 | Ivory Coast         | CIV                 | Solomon Islands     | SLB                 |
| Cameroon                     | CMR                 | Kenya               | KEN                 | Somalia             | SOM                 |
| Central African Republic     | CAF                 | Lao PDR             | LAO                 | South Africa        | ZAF                 |
| Chad                         | TCD                 |                     |                     | South Sudan         | SSD                 |
| China                        | CHN                 | Liberia             | LBR                 | Sudan               | SDN                 |
| Colombia                     | COL                 | Madagascar          | MDG                 | Tanzania            | TZA                 |
| Comoros                      | COM                 | Malawi              | MWI                 | Thailand            | THA                 |
| Congo                        | COG                 | Mali                | MLI                 | Togo                | TGO                 |
| Democratic Republic of Congo | COD                 | Mauritania          | MRT                 | Uganda              | UGA                 |
| Ecuador                      | ECU                 | Mozambique          | MOZ                 | Venezuela           | VEN                 |
| Equatorial Guinea            | GNQ                 | Myanmar             | MMR                 | Vietnam             | VNM                 |
| Ethiopia                     | ETH                 | Nepal               | NPL                 | Zambia              | ZMB                 |
| French Guiana                | GUF                 | Niger               | NER                 | Zimbabwe            | ZWE                 |



















```

159_H32 TTCTCTTTCTCCAATCTTTTAT~
159_H33 TTCTCTTTCTCCAATcTTTTATTACATCTTCTTTCTCTTTCTCCAATCTTTTATcACATCTTC~ ca
159_H34 TTCTCTTTCTCCAATCTTTTATTACATCTTCTTTCTCTTTCTCCAATCTTTTAT~
159_H35 TTCTCTTTCTCCAATCTTTTATTACATCTTCTTTCTCTTTCTCCAATCTTTTATTACATCTTCTTTCTCTTTC~
159_H36 TTCTCTTTTTCGAACCCTTTTATTACATCTTCTTTCTCTTTCTCCAATCTTTTATTACATCTTCTTTCTCTTTCCCAATCTTTTATTACATCTTCTT
159_H37 TTCTCTTTCTCCAATCTTTTATTACATCTTCTTTCTCTTTCTCCAATCTTTTAT~
159_H38 TTCTCTTTCTCCAATCTTTTATTACATCTTCTTTCTCTTTCTCCAATCTTTTAT~
159_H39 TTCTCTTTCTCCAATCTTTTATTACATCTTCTTTCTCTTTCTCCAATCTTTTAT~
159_H40 TTCTCTTTTTCGAACCCTTTTATTACATCTTCTTTCTCTTTCTCCAATCTTTTATTACATCTTCTTTCTCTTTC~
159_H41 TTCTCTTTCTCCAATCTTTTAT~
159_H42 TTCTCTTTCTCCAATCTTTTATTACATCTTCTTTCTCTTTCTCCAATCTTTTAT~

```

```

          710      720      730      740
...|...|...|...|...|...|...|...|.
159_3D7 ~TCCAATCTTTTATCACATCTCCAGATGTTCC
159_H01 ~CACATCTCCAGATGTTCC
159_H02 ~CACATCTCCAGATGTTCC
159_H03 ~CACATCTCCAGATGTTCC
159_H04 ~CACATCTCCAGATGTTCC
159_H05 ~CACATCTCCAGATGTTCC
159_H06 ~CACATCTCCAGATGTTCC
159_H07 ~TCCAATCTTTTATCaCaTCCTCCAGATGTTCC
159_H08 ~CACATCTCCAGATGTTCC
159_H09 ~CaCaTCCTCCAGATGTTCC
159_H10 ~CACATCTCCAGATGTTCC
159_H11 ~CaCaTCCTCCAGATGTTCC
159_H12 ~CACATCTCCAGATGTTCC
159_H13 ~TCCAATCTTTTATCaCaTCCTCCAGATGTTCC
159_H14 ~TCCAATCTTTTATCACATCTCCAGATGTTcC
159_H15 ~TCCAATCTTTTATCACATCTCCAGATGTTCC
159_H16 ~TCCAATCTTTTATCACATCTCCAGATGTTCC
159_H17 ~CACATCTCCAGATGTTCC
159_H18 ~TCCAATCTTTTATCACATCTCCAGATGTTCC
159_H19 ~TCCAATCTTTTATCACATCTCCAGATGTTCC
159_H20 ~CACATCTCCAGATGTTCC
159_H21 ~CACATCTCCAGATGTTCC
159_H22 ~TCCAATCTTTTATCACATCTCCAGATGTTCC
159_H23 ~TCCAATCTTTTATCACATCTCCAGATGTTCC
159_H24 ~CACATCTCCAGATgTTCC
159_H25 ~TCCAATCTTTTATCACATCTCCAGATGTTCC
159_H26 ~TCCAATCTTTTATCACATCTCCAGATGTTCC
159_H27 ~TCCAATCTTTTATCACATCTCCAGATGTTCC
159_H28 ~CACATCTCCAGATGTTCC
159_H29 ~CaCaTCCTCCAGATGTTCC
159_H30 ~CACATCTCCAGATGTTCC
159_H31 ~CACATCTCCAGATGTTCC
159_H32 ~CACATCTCCAGATGTTCC
159_H33 gaTgTTcTCCAATCTTTTATCACATCTCCAGATGTTCC
159_H34 ~CACATCTCCAGATGTTCC
159_H35 ~TCCAATCTTTTATCACATCTCCAGATGTTCC
159_H36 TCTCTTTCCCAATCTTTTATCACATCTCCAGATGTTCC
159_H37 ~CACATCTCCAGATGTTCC
159_H38 ~CACATCTCCAGATGTTCC
159_H39 ~CACATCTCCAGATGTTCC
159_H40 ~TCCAATCTTTTATCACATCTCCAGATGTTCC

```

159 H41 ~~~~~CACATCTCCAGATGTTCC  
159 H42 ~~~~~CACATCTCCAGATGTTCC

**Table S9.** Full data listing the PF3D7\_1337500 (K13\_151) and PF3D7\_1339700 (K13\_159) alleles, located 200 kb upstream from K13 on chromosome 13 and their flanking haplotype number by K13 mutants (C580Y, Y493H, R539T, I543T, P553L, P574L, E605K, F446I, N458Y, R561H, A578S, S522C, V589I) in 359 continent- or country-shared samples collected in the KARMA study 2014 and previously in Cambodia in 2002 and 2004-2005 (C580Y). Colored backgrounds indicate individual countries.

**C580Y**

| Continent | Region         | Country  | Resident/<br>Travelers | Sample Location | Year of<br>collection | K13 allele | Nucleotide<br>change | K13_151<br>allele | K13_159<br>allele | Haplotypes      | Flanking<br>Haplotype_ID |
|-----------|----------------|----------|------------------------|-----------------|-----------------------|------------|----------------------|-------------------|-------------------|-----------------|--------------------------|
| ASIA      | Southeast Asia | Cambodia | Resident               | Battambang      | 2013                  | C580Y      | tgt to tat           | 151_H02           | 159_H25           | 151_H02/159_H25 | 29                       |
| ASIA      | Southeast Asia | Cambodia | Resident               | Battambang      | 2013                  | C580Y      | tgt to tat           | 151_H02           | 159_H25           | 151_H02/159_H25 | 29                       |
| ASIA      | Southeast Asia | Cambodia | Resident               | Kampong Thom    | 2012                  | C580Y      | tgt to tat           | 151_H02           | 159_H25           | 151_H02/159_H25 | 29                       |
| ASIA      | Southeast Asia | Cambodia | Resident               | Kampong Thom    | 2012                  | C580Y      | tgt to tat           | 151_H02           | 159_H25           | 151_H02/159_H25 | 29                       |
| ASIA      | Southeast Asia | Cambodia | Resident               | Kampong Thom    | 2012                  | C580Y      | tgt to tat           | 151_H02           | 159_H25           | 151_H02/159_H25 | 29                       |
| ASIA      | Southeast Asia | Cambodia | Resident               | Kampong Thom    | 2012                  | C580Y      | tgt to tat           | 151_H02           | 159_H25           | 151_H02/159_H25 | 29                       |
| ASIA      | Southeast Asia | Cambodia | Resident               | Kratie          | 2013                  | C580Y      | tgt to tat           | 151_H02           | 159_H25           | 151_H02/159_H25 | 29                       |
| ASIA      | Southeast Asia | Cambodia | Resident               | Kratie          | 2014                  | C580Y      | tgt to tat           | 151_H02           | 159_H25           | 151_H02/159_H25 | 29                       |
| ASIA      | Southeast Asia | Cambodia | Resident               | Kratie          | 2014                  | C580Y      | tgt to tat           | 151_H02           | 159_H25           | 151_H02/159_H25 | 29                       |
| ASIA      | Southeast Asia | Cambodia | Resident               | Kratie          | 2013                  | C580Y      | tgt to tat           | 151_H02           | 159_H25           | 151_H02/159_H25 | 29                       |
| ASIA      | Southeast Asia | Cambodia | Resident               | Mondulkiri      | 2014                  | C580Y      | tgt to tat           | 151_H02           | 159_H25           | 151_H02/159_H25 | 29                       |
| ASIA      | Southeast Asia | Cambodia | Resident               | Mondulkiri      | 2013                  | C580Y      | tgt to tat           | 151_H02           | 159_H25           | 151_H02/159_H25 | 29                       |
| ASIA      | Southeast Asia | Cambodia | Resident               | Mondulkiri      | 2013                  | C580Y      | tgt to tat           | 151_H02           | 159_H25           | 151_H02/159_H25 | 29                       |
| ASIA      | Southeast Asia | Cambodia | Resident               | Oddar Meanchey  | 2012                  | C580Y      | tgt to tat           | 151_H02           | 159_H25           | 151_H02/159_H25 | 29                       |
| ASIA      | Southeast Asia | Cambodia | Resident               | Pailin          | 2002                  | C580Y      | tgt to tat           | 151_H02           | 159_H25           | 151_H02/159_H25 | 29                       |
| ASIA      | Southeast Asia | Cambodia | Resident               | Pailin          | 2002                  | C580Y      | tgt to tat           | 151_H02           | 159_H25           | 151_H02/159_H25 | 29                       |
| ASIA      | Southeast Asia | Cambodia | Resident               | Pailin          | 2002                  | C580Y      | tgt to tat           | 151_H02           | 159_H25           | 151_H02/159_H25 | 29                       |
| ASIA      | Southeast Asia | Cambodia | Resident               | Pailin          | 2002                  | C580Y      | tgt to tat           | 151_H02           | 159_H25           | 151_H02/159_H25 | 29                       |
| ASIA      | Southeast Asia | Cambodia | Resident               | Pailin          | 2002                  | C580Y      | tgt to tat           | 151_H02           | 159_H25           | 151_H02/159_H25 | 29                       |
| ASIA      | Southeast Asia | Cambodia | Resident               | Pailin          | 2002                  | C580Y      | tgt to tat           | 151_H02           | 159_H25           | 151_H02/159_H25 | 29                       |
| ASIA      | Southeast Asia | Cambodia | Resident               | Pailin          | 2002                  | C580Y      | tgt to tat           | 151_H02           | 159_H25           | 151_H02/159_H25 | 29                       |
| ASIA      | Southeast Asia | Cambodia | Resident               | Pailin          | 2002                  | C580Y      | tgt to tat           | 151_H02           | 159_H25           | 151_H02/159_H25 | 29                       |













|      |                |          |          |                                               |      |       |            |         |         |                 |    |
|------|----------------|----------|----------|-----------------------------------------------|------|-------|------------|---------|---------|-----------------|----|
| ASIA | Southeast Asia | Cambodia | Resident | Kampong Thom                                  | 2012 | C580Y | tgt to tat | 151_H05 | 159_H06 | 151_H05/159_H06 | 36 |
| ASIA | Southeast Asia | Cambodia | Resident | Kratie                                        | 2013 | C580Y | tgt to tat | 151_H06 | 159_H06 | 151_H06/159_H06 | 37 |
| ASIA | Southeast Asia | Thailand | Resident | Sai Yok District,<br>Kanchanaburi<br>Province | 2013 | C580Y | tgt to tat | 151_H07 | 159_H05 | 151_H07/159_H05 | 42 |
| ASIA | Southeast Asia | Thailand | Resident | Sai Yok District,<br>Kanchanaburi<br>Province | 2013 | C580Y | tgt to tat | 151_H07 | 159_H05 | 151_H07/159_H05 | 42 |
| ASIA | Southeast Asia | Thailand | Resident | Sai Yok District,<br>Kanchanaburi<br>Province | 2013 | C580Y | tgt to tat | 151_H07 | 159_H05 | 151_H07/159_H05 | 42 |
| ASIA | Southeast Asia | Thailand | Resident | Sai Yok District,<br>Kanchanaburi<br>Province | 2013 | C580Y | tgt to tat | 151_H07 | 159_H05 | 151_H07/159_H05 | 42 |
| ASIA | Southeast Asia | Cambodia | Resident | Kratie                                        | 2013 | C580Y | tgt to tat | 151_H07 | 159_H06 | 151_H07/159_H06 | 43 |
| ASIA | Southeast Asia | Cambodia | Resident | Kratie                                        | 2014 | C580Y | tgt to tat | 151_H07 | 159_H06 | 151_H07/159_H06 | 43 |
| ASIA | Southeast Asia | Cambodia | Resident | Kratie                                        | 2013 | C580Y | tgt to tat | 151_H07 | 159_H06 | 151_H07/159_H06 | 43 |
| ASIA | Southeast Asia | Cambodia | Resident | Kratie                                        | 2013 | C580Y | tgt to tat | 151_H07 | 159_H06 | 151_H07/159_H06 | 43 |
| ASIA | Southeast Asia | Cambodia | Resident | Kratie                                        | 2014 | C580Y | tgt to tat | 151_H07 | 159_H06 | 151_H07/159_H06 | 43 |
| ASIA | Southeast Asia | Cambodia | Resident | Pursat                                        | 2012 | C580Y | tgt to tat | 151_H07 | 159_H06 | 151_H07/159_H06 | 43 |
| ASIA | Southeast Asia | Cambodia | Resident | Pursat                                        | 2012 | C580Y | tgt to tat | 151_H07 | 159_H06 | 151_H07/159_H06 | 43 |
| ASIA | Southeast Asia | Cambodia | Resident | Pursat                                        | 2012 | C580Y | tgt to tat | 151_H07 | 159_H06 | 151_H07/159_H06 | 43 |
| ASIA | Southeast Asia | Cambodia | Resident | Pursat                                        | 2013 | C580Y | tgt to tat | 151_H07 | 159_H06 | 151_H07/159_H06 | 43 |
| ASIA | Southeast Asia | Cambodia | Resident | Pursat                                        | 2012 | C580Y | tgt to tat | 151_H07 | 159_H06 | 151_H07/159_H06 | 43 |
| ASIA | Southeast Asia | Cambodia | Resident | Pursat                                        | 2012 | C580Y | tgt to tat | 151_H07 | 159_H06 | 151_H07/159_H06 | 43 |
| ASIA | Southeast Asia | Cambodia | Resident | Pursat                                        | 2012 | C580Y | tgt to tat | 151_H07 | 159_H06 | 151_H07/159_H06 | 43 |
| ASIA | Southeast Asia | Cambodia | Resident | Pursat                                        | 2012 | C580Y | tgt to tat | 151_H07 | 159_H06 | 151_H07/159_H06 | 43 |
| ASIA | Southeast Asia | Vietnam  | Resident | Dak Nong province                             | 2013 | C580Y | tgt to tat | 151_H07 | 159_H06 | 151_H07/159_H06 | 43 |
| ASIA | Southeast Asia | Vietnam  | Resident | Dak Nong province                             | 2013 | C580Y | tgt to tat | 151_H07 | 159_H06 | 151_H07/159_H06 | 43 |
| ASIA | Southeast Asia | Vietnam  | Resident | Dak Nong province                             | 2013 | C580Y | tgt to tat | 151_H07 | 159_H06 | 151_H07/159_H06 | 43 |
| ASIA | Southeast Asia | Vietnam  | Resident | Gia Lai province                              | 2013 | C580Y | tgt to tat | 151_H07 | 159_H06 | 151_H07/159_H06 | 43 |
| ASIA | Southeast Asia | Cambodia | Resident | Pailin                                        | 2012 | C580Y | tgt to tat | 151_H07 | 159_H09 | 151_H07/159_H09 | 45 |

|      |                |          |          |                     |      |       |            |         |         |                 |    |
|------|----------------|----------|----------|---------------------|------|-------|------------|---------|---------|-----------------|----|
| ASIA | Southeast Asia | Vietnam  | Resident | Binh Phuoc province | 2013 | C580Y | tgt to tat | 151_H07 | 159_H13 | 151_H07/159_H13 | 46 |
| ASIA | Southeast Asia | Cambodia | Resident | Kampt               | 2013 | C580Y | tgt to tat | 151_H07 | 159_H25 | 151_H07/159_H25 | 49 |
| ASIA | Southeast Asia | Cambodia | Resident | Stung Treng         | 2013 | C580Y | tgt to tat | 151_H07 | 159_H25 | 151_H07/159_H25 | 49 |
| ASIA | Southeast Asia | Cambodia | Resident | Pailin              | 2012 | C580Y | tgt to tat | 151_H07 | 159_H32 | 151_H07/159_H32 | 50 |
| ASIA | Southeast Asia | Cambodia | Resident | Kampong Speu        | 2012 | C580Y | tgt to tat | 151_H07 | 159_H34 | 151_H07/159_H34 | 51 |
| ASIA | Southeast Asia | Cambodia | Resident | Kampong Speu        | 2012 | C580Y | tgt to tat | 151_H07 | 159_H34 | 151_H07/159_H34 | 51 |
| ASIA | Southeast Asia | Cambodia | Resident | Kampong Speu        | 2012 | C580Y | tgt to tat | 151_H08 | 159_H06 | 151_H08/159_H06 | 56 |
| ASIA | Southeast Asia | Cambodia | Resident | Kampong Speu        | 2012 | C580Y | tgt to tat | 151_H08 | 159_H06 | 151_H08/159_H06 | 56 |
| ASIA | Southeast Asia | Cambodia | Resident | Mondulkiri          | 2013 | C580Y | tgt to tat | 151_H08 | 159_H06 | 151_H08/159_H06 | 56 |
| ASIA | Southeast Asia | Cambodia | Resident | Battambang          | 2012 | C580Y | tgt to tat | 151_H08 | 159_H09 | 151_H08/159_H09 | 57 |
| ASIA | Southeast Asia | Cambodia | Resident | Oddar Meanchey      | 2012 | C580Y | tgt to tat | 151_H08 | 159_H09 | 151_H08/159_H09 | 57 |
| ASIA | Southeast Asia | Cambodia | Resident | Oddar Meanchey      | 2012 | C580Y | tgt to tat | 151_H08 | 159_H09 | 151_H08/159_H09 | 57 |
| ASIA | Southeast Asia | Cambodia | Resident | Oddar Meanchey      | 2012 | C580Y | tgt to tat | 151_H08 | 159_H09 | 151_H08/159_H09 | 57 |
| ASIA | Southeast Asia | Cambodia | Resident | Oddar Meanchey      | 2012 | C580Y | tgt to tat | 151_H08 | 159_H09 | 151_H08/159_H09 | 57 |
| ASIA | Southeast Asia | Cambodia | Resident | Pursat              | 2013 | C580Y | tgt to tat | 151_H08 | 159_H09 | 151_H08/159_H09 | 57 |
| ASIA | Southeast Asia | Cambodia | Resident | Rattanakiri         | 2013 | C580Y | tgt to tat | 151_H08 | 159_H25 | 151_H08/159_H25 | 59 |
| ASIA | Southeast Asia | Cambodia | Resident | Rattanakiri         | 2013 | C580Y | tgt to tat | 151_H08 | 159_H25 | 151_H08/159_H25 | 59 |
| ASIA | Southeast Asia | Vietnam  | Resident | Binh Phuoc province | 2013 | C580Y | tgt to tat | 151_H08 | 159_H34 | 151_H08/159_H34 | 61 |
| ASIA | Southeast Asia | Vietnam  | Resident | Binh Phuoc province | 2013 | C580Y | tgt to tat | 151_H08 | 159_H34 | 151_H08/159_H34 | 61 |
| ASIA | Southeast Asia | Vietnam  | Resident | Binh Phuoc province | 2013 | C580Y | tgt to tat | 151_H08 | 159_H34 | 151_H08/159_H34 | 61 |
| ASIA | Southeast Asia | Vietnam  | Resident | Binh Phuoc province | 2013 | C580Y | tgt to tat | 151_H08 | 159_H34 | 151_H08/159_H34 | 61 |
| ASIA | Southeast Asia | Cambodia | Resident | Mondulkiri          | 2013 | C580Y | tgt to tat | 151_H09 | 159_H06 | 151_H09/159_H06 | 62 |

#### Y493H

| Continent | Region         | Country  | Resident /Travelers | Sample Location | Year of collection | K13 allele | Nucleotide change | K13_151 allele | K13_159 allele | Haplotypes      | Flanking Haplotype ID |
|-----------|----------------|----------|---------------------|-----------------|--------------------|------------|-------------------|----------------|----------------|-----------------|-----------------------|
| ASIA      | Southeast Asia | Cambodia | Resident            | Pursat          | 2012               | Y493H      | tac to cac        | 151_H04        | 159_H35        | 151_H04/159_H35 | 35                    |

|      |                |          |          |                     |      |       |            |         |         |                 |    |
|------|----------------|----------|----------|---------------------|------|-------|------------|---------|---------|-----------------|----|
| ASIA | Southeast Asia | Cambodia | Resident | Pursat              | 2012 | Y493H | tac to cac | 151_H04 | 159_H35 | 151_H04/159_H35 | 35 |
| ASIA | Southeast Asia | Cambodia | Resident | Kampong Thom        | 2012 | Y493H | tac to cac | 151_H07 | 159_H03 | 151_H07/159_H03 | 41 |
| ASIA | Southeast Asia | Cambodia | Resident | Kampong Thom        | 2012 | Y493H | tac to cac | 151_H07 | 159_H03 | 151_H07/159_H03 | 41 |
| ASIA | Southeast Asia | Cambodia | Resident | Kampong Thom        | 2012 | Y493H | tac to cac | 151_H07 | 159_H03 | 151_H07/159_H03 | 41 |
| ASIA | Southeast Asia | Cambodia | Resident | Pailin              | 2012 | Y493H | tac to cac | 151_H07 | 159_H03 | 151_H07/159_H03 | 41 |
| ASIA | Southeast Asia | Vietnam  | Resident | Binh Phuoc province | 2013 | Y493H | tac to cac | 151_H07 | 159_H03 | 151_H07/159_H03 | 41 |
| ASIA | Southeast Asia | Cambodia | Resident | Pursat              | 2012 | Y493H | tac to cac | 151_H07 | 159_H06 | 151_H07/159_H06 | 43 |
| ASIA | Southeast Asia | Cambodia | Resident | Pursat              | 2012 | Y493H | tac to cac | 151_H07 | 159_H08 | 151_H07/159_H08 | 44 |
| ASIA | Southeast Asia | Cambodia | Resident | Pailin              | 2012 | Y493H | tac to cac | 151_H07 | 159_H34 | 151_H07/159_H34 | 51 |
| ASIA | Southeast Asia | Vietnam  | Resident | Binh Phuoc province | 2013 | Y493H | tac to cac | 151_H07 | 159_H34 | 151_H07/159_H34 | 51 |
| ASIA | Southeast Asia | Vietnam  | Resident | Binh Phuoc province | 2013 | Y493H | tac to cac | 151_H07 | 159_H34 | 151_H07/159_H34 | 51 |
| ASIA | Southeast Asia | Vietnam  | Resident | Binh Phuoc province | 2013 | Y493H | tac to cac | 151_H07 | 159_H34 | 151_H07/159_H34 | 51 |
| ASIA | Southeast Asia | Vietnam  | Resident | Binh Phuoc province | 2013 | Y493H | tac to cac | 151_H07 | 159_H34 | 151_H07/159_H34 | 51 |
| ASIA | Southeast Asia | Vietnam  | Resident | Binh Phuoc province | 2013 | Y493H | tac to cac | 151_H07 | 159_H34 | 151_H07/159_H34 | 51 |
| ASIA | Southeast Asia | Cambodia | Resident | Pursat              | 2012 | Y493H | tac to cac | 151_H07 | 159_H35 | 151_H07/159_H35 | 52 |
| ASIA | Southeast Asia | Cambodia | Resident | Pursat              | 2012 | Y493H | tac to cac | 151_H07 | 159_H35 | 151_H07/159_H35 | 52 |
| ASIA | Southeast Asia | Cambodia | Resident | Pursat              | 2012 | Y493H | tac to cac | 151_H07 | 159_H35 | 151_H07/159_H35 | 52 |
| ASIA | Southeast Asia | Cambodia | Resident | Pursat              | 2012 | Y493H | tac to cac | 151_H07 | 159_H35 | 151_H07/159_H35 | 52 |
| ASIA | Southeast Asia | Cambodia | Resident | Pursat              | 2012 | Y493H | tac to cac | 151_H07 | 159_H35 | 151_H07/159_H35 | 52 |
| ASIA | Southeast Asia | Cambodia | Resident | Pursat              | 2012 | Y493H | tac to cac | 151_H07 | 159_H35 | 151_H07/159_H35 | 52 |
| ASIA | Southeast Asia | Cambodia | Resident | Pursat              | 2012 | Y493H | tac to cac | 151_H07 | 159_H35 | 151_H07/159_H35 | 52 |



|      |                |          |          |                |      |       |            |         |         |                 |    |
|------|----------------|----------|----------|----------------|------|-------|------------|---------|---------|-----------------|----|
| ASIA | Southeast Asia | Cambodia | Resident | Pursat         | 2012 | R539T | aga to aca | 151_H07 | 159_H06 | 151_H07/159_H06 | 43 |
| ASIA | Southeast Asia | Cambodia | Resident | Pursat         | 2012 | R539T | aga to aca | 151_H07 | 159_H06 | 151_H07/159_H06 | 43 |
| ASIA | Southeast Asia | Cambodia | Resident | Pursat         | 2012 | R539T | aga to aca | 151_H07 | 159_H06 | 151_H07/159_H06 | 43 |
| ASIA | Southeast Asia | Cambodia | Resident | Rattanakiri    | 2013 | R539T | aga to aca | 151_H07 | 159_H06 | 151_H07/159_H06 | 43 |
| ASIA | Southeast Asia | Cambodia | Resident | Pailin         | 2012 | R539T | aga to aca | 151_H09 | 159_H06 | 151_H09/159_H06 | 62 |
| ASIA | Southeast Asia | Cambodia | Resident | Oddar Meanchey | 2012 | R539T | tgt to tat | 151_H09 | 159_H06 | 151_H09/159_H06 | 62 |

### I543T

| Continent | Region         | Country  | Resident /Travelers | Sample Location  | Year of collection | K13 allele | Nucleotide change | K13_151 allele | K13_159 allele | Haplotypes      | Flanking Haplotype_ID |
|-----------|----------------|----------|---------------------|------------------|--------------------|------------|-------------------|----------------|----------------|-----------------|-----------------------|
| ASIA      | Southeast Asia | Cambodia | Resident            | Rattanakiri      | 2012               | I543T      | att to act        | 151_H07        | 159_H09        | 151_H07/159_H09 | 45                    |
| ASIA      | Southeast Asia | Vietnam  | Resident            | Gia Lai province | 2013               | I543T      | att to act        | 151_H07        | 159_H09        | 151_H07/159_H09 | 45                    |
| ASIA      | Southeast Asia | Vietnam  | Resident            | Gia Lai province | 2013               | I543T      | att to act        | 151_H07        | 159_H09        | 151_H07/159_H09 | 45                    |
| ASIA      | Southeast Asia | Vietnam  | Resident            | Gia Lai province | 2013               | I543T      | att to act        | 151_H07        | 159_H09        | 151_H07/159_H09 | 45                    |
| ASIA      | Southeast Asia | Vietnam  | Resident            | Gia Lai province | 2013               | I543T      | att to act        | 151_H07        | 159_H09        | 151_H07/159_H09 | 45                    |
| ASIA      | Southeast Asia | Vietnam  | Resident            | Gia Lai province | 2013               | I543T      | att to act        | 151_H09        | 159_H09        | 151_H09/159_H09 | 63                    |

### P553L

| Continent | Region         | Country  | Resident /Travelers | Sample Location   | Year of collection | K13 allele | Nucleotide change | K13_151 allele | K13_159 allele | Haplotypes      | Flanking Haplotype_ID |
|-----------|----------------|----------|---------------------|-------------------|--------------------|------------|-------------------|----------------|----------------|-----------------|-----------------------|
| ASIA      | Southeast Asia | Cambodia | Resident            | Kratie            | 2013               | P553L/WT   | cgg to ctg        | 151_3D7        | 159_H06        | 151_3D7/159_H06 | 1                     |
| ASIA      | Southeast Asia | Thailand | Resident            | Mae Sot           | 2009               | P553L      | cgg to ctg        | 151_3D7        | 159_H09        | 151_3D7/159_H09 | 3                     |
| ASIA      | Southeast Asia | Vietnam  | Resident            | Dak Nong province | 2013               | P553L      | cgg to ctg        | 151_H04        | 159_H06        | 151_H04/159_H06 | 32                    |
| ASIA      | Southeast Asia | Vietnam  | Resident            | Dak Nong province | 2013               | P553L      | cgg to ctg        | 151_H04        | 159_H06        | 151_H04/159_H06 | 32                    |
| ASIA      | Southeast Asia | Vietnam  | Resident            | Dak Nong province | 2013               | P553L      | cgg to ctg        | 151_H06        | 159_H15        | 151_H06/159_H15 | 38                    |
| ASIA      | Southeast Asia | Vietnam  | Resident            | Dak Nong province | 2013               | P553L      | cgg to ctg        | 151_H06        | 159_H15        | 151_H06/159_H15 | 38                    |
| ASIA      | Southeast Asia | Vietnam  | Resident            | Dak Nong province | 2013               | P553L      | cgg to ctg        | 151_H06        | 159_H15        | 151_H06/159_H15 | 38                    |
| ASIA      | Southeast Asia | Vietnam  | Resident            | Dak Nong province | 2013               | P553L      | cgg to ctg        | 151_H06        | 159_H15        | 151_H06/159_H15 | 38                    |

|      |                |         |          |                     |      |       |            |         |         |                 |    |
|------|----------------|---------|----------|---------------------|------|-------|------------|---------|---------|-----------------|----|
| ASIA | Southeast Asia | Vietnam | Resident | Dak Nong province   | 2013 | P553L | ccg to ctg | 151_H06 | 159_H15 | 151_H06/159_H15 | 38 |
| ASIA | Southeast Asia | Vietnam | Resident | Dak Nong province   | 2013 | P553L | ccg to ctg | 151_H06 | 159_H15 | 151_H06/159_H15 | 38 |
| ASIA | Southeast Asia | Vietnam | Resident | Dak Nong province   | 2013 | P553L | ccg to ctg | 151_H06 | 159_H15 | 151_H06/159_H15 | 38 |
| ASIA | Southeast Asia | Vietnam | Resident | Dak Nong province   | 2013 | P553L | ccg to ctg | 151_H06 | 159_H15 | 151_H06/159_H15 | 38 |
| ASIA | Southeast Asia | Vietnam | Resident | Dak Nong province   | 2013 | P553L | ccg to ctg | 151_H06 | 159_H15 | 151_H06/159_H15 | 38 |
| ASIA | Southeast Asia | Vietnam | Resident | Binh Phuoc province | 2013 | P553L | ccg to ctg | 151_H09 | 159_H03 | 151_H09/159_H03 | 66 |

### P574L

| Continent | Region         | Country  | Resident /Travelers | Sample Location                           | Year of collection | K13 allele | Nucleotide change | K13_151 allele | K13_159 allele | Haplotypes      | Flanking Haplotype_ID |
|-----------|----------------|----------|---------------------|-------------------------------------------|--------------------|------------|-------------------|----------------|----------------|-----------------|-----------------------|
| ASIA      | Southeast Asia | Thailand | Resident            | Mae Sot                                   | 2006               | P574L      | cct to ttc        | 151_H03        | 159_H32        | 151_H03/159_H32 | 30                    |
| ASIA      | Southeast Asia | Thailand | Resident            | Suan Pheung District, Ratchaburi Province | 2014               | P574L      | cct to ctt        | 151_H04        | 159_H04        | 151_H04/159_H04 | 31                    |
| ASIA      | Southeast Asia | Thailand | Resident            | Suan Pheung District, Ratchaburi Province | 2014               | P574L      | cct to ctt        | 151_H04        | 159_H04        | 151_H04/159_H04 | 31                    |
| ASIA      | East Asia      | China    | Resident            | Tengchong                                 | 2008               | P574L      | cct to ctt        | 151_H07        | 159_H01        | 151_H07/159_H01 | 40                    |
| ASIA      | Southeast Asia | Thailand | Resident            | Sai Yok District, Kanchanaburi Province   | 2013               | P574L      | cct to ctt        | 151_H07        | 159_H32        | 151_H07/159_H32 | 50                    |
| ASIA      | Southeast Asia | Thailand | Resident            | Sai Yok District, Kanchanaburi Province   | 2013               | P574L      | cct to ctt        | 151_H07        | 159_H32        | 151_H07/159_H32 | 50                    |
| ASIA      | East Asia      | China    | Resident            | Tengchong                                 | 2012               | P574L      | cct to ctt        | 151_H08        | 159_H05        | 151_H08/159_H05 | 55                    |
| ASIA      | Southeast Asia | Thailand | Resident            | Ranong                                    | 2009               | P574L      | cct to ttc        | 151_H08        | 159_H32        | 151_H08/159_H32 | 60                    |
| ASIA      | Southeast Asia | Thailand | Resident            | Ranong                                    | 2010               | P574L      | cct to ttc        | 151_H08        | 159_H32        | 151_H08/159_H32 | 60                    |
| ASIA      | East Asia      | China    | Resident            | Yingjiang                                 | 2011               | P574L      | cct to ctt        | 151_H09        | 159_H34        | 151_H09/159_H34 | 64                    |

### E605K

| Continent | Region         | Country | Resident /Travelers | Sample Location     | Year of collection | K13 allele | Nucleotide change | K13_151 allele | K13_159 allele | Haplotypes      | Flanking Haplotype_ID |
|-----------|----------------|---------|---------------------|---------------------|--------------------|------------|-------------------|----------------|----------------|-----------------|-----------------------|
| ASIA      | Southeast Asia | Vietnam | Resident            | Binh Phuoc province | 2013               | E605K      | gaa to aaa        | 151_H08        | 159_H01        | 151_H08/159_H01 | 53                    |
| ASIA      | Southeast Asia | Vietnam | Resident            | Binh Phuoc province | 2013               | E605K      | gaa to aaa        | 151_H08        | 159_H01        | 151_H08/159_H01 | 53                    |
| ASIA      | East Asia      | China   | Resident            | Tengchong           | 2009               | E605K      | gaa to aaa        | 151_H08        | 159_H03        | 151_H08/159_H03 | 54                    |

### F446I

| Continent | Region    | Country | Resident /Travelers | Sample Location | Year of collection | K13 allele | Nucleotide change | K13_151 allele | K13_159 allele | Haplotypes      | Flanking Haplotype_ID |
|-----------|-----------|---------|---------------------|-----------------|--------------------|------------|-------------------|----------------|----------------|-----------------|-----------------------|
| ASIA      | East Asia | Myanmar | Resident            | Tamu            | 2014               | F446I      | ttt to att        | 151_3D7        | 159_H28        | 151_3D7/159_H28 | 19                    |
| ASIA      | East Asia | China   | Resident            | Tengchong       | 2008               | F446I      | ttt to att        | 151_H01        | 159_H28        | 151_H01/159_H28 | 27                    |
| ASIA      | East Asia | China   | Resident            | Tengchong       | 2012               | F446I      | ttt to att        | 151_H04        | 159_H06        | 151_H04/159_H06 | 32                    |
| ASIA      | East Asia | Myanmar | Resident            | Pyin Oo Lwin    | 2014               | F446I      | ttt to att        | 151_3D7        | 159_H39        | 151_3D7/159_H39 | 69                    |
| ASIA      | East Asia | Myanmar | Resident            | Pyin Oo Lwin    | 2014               | F446I      | ttt to att        | 151_3D7        | 159_H39        | 151_3D7/159_H39 | 69                    |
| ASIA      | East Asia | Myanmar | Resident            | Pyin Oo Lwin    | 2014               | F446I      | ttt to att        | 151_3D7        | 159_H42        | 151_3D7/159_H42 | 71                    |
| ASIA      | East Asia | Myanmar | Resident            | Pyin Oo Lwin    | 2014               | F446I      | ttt to att        | 151_3D7        | 159_H42        | 151_3D7/159_H42 | 71                    |
| ASIA      | East Asia | Myanmar | Resident            | Tamu            | 2014               | F446I      | ttt to att        | 151_3D7        | 159_H42        | 151_3D7/159_H42 | 71                    |
| ASIA      | East Asia | Myanmar | Resident            | Pyin Oo Lwin    | 2014               | F446I      | ttt to att        | 151_H04        | 159_H03        | 151_H04/159_H03 | 72                    |
| ASIA      | East Asia | Myanmar | Resident            | Pyin Oo Lwin    | 2014               | F446I      | ttt to att        | 151_H04        | 159_H05        | 151_H04/159_H05 | 73                    |
| ASIA      | East Asia | Myanmar | Resident            | Pyin Oo Lwin    | 2014               | F446I      | ttt to att        | 151_H04        | 159_H05        | 151_H04/159_H05 | 73                    |
| ASIA      | East Asia | Myanmar | Resident            | Pyin Oo Lwin    | 2014               | F446I      | ttt to att        | 151_H04        | 159_H05        | 151_H04/159_H05 | 73                    |
| ASIA      | East Asia | Myanmar | Resident            | Pyin Oo Lwin    | 2014               | F446I      | ttt to att        | 151_H04        | 159_H05        | 151_H04/159_H05 | 73                    |
| ASIA      | East Asia | Myanmar | Resident            | Pyin Oo Lwin    | 2014               | F446I      | ttt to att        | 151_H04        | 159_H05        | 151_H04/159_H05 | 73                    |
| ASIA      | East Asia | Myanmar | Resident            | Pyin Oo Lwin    | 2014               | F446I      | ttt to att        | 151_H04        | 159_H05        | 151_H04/159_H05 | 73                    |
| ASIA      | East Asia | Myanmar | Resident            | Pyin Oo Lwin    | 2014               | F446I      | ttt to att        | 151_H04        | 159_H05        | 151_H04/159_H05 | 73                    |
| ASIA      | East Asia | Myanmar | Resident            | Tamu            | 2014               | F446I      | ttt to att        | 151_H04        | 159_H05        | 151_H04/159_H05 | 73                    |
| ASIA      | East Asia | Myanmar | Resident            | Tamu            | 2014               | F446I      | ttt to att        | 151_H04        | 159_H05        | 151_H04/159_H05 | 73                    |
| ASIA      | East Asia | Myanmar | Resident            | Tamu            | 2014               | F446I      | ttt to att        | 151_H04        | 159_H05        | 151_H04/159_H05 | 73                    |
| ASIA      | East Asia | Myanmar | Resident            | Tamu            | 2014               | F446I      | ttt to att        | 151_H04        | 159_H05        | 151_H04/159_H05 | 73                    |



|      |           |         |          |              |      |       |            |         |         |                 |    |
|------|-----------|---------|----------|--------------|------|-------|------------|---------|---------|-----------------|----|
| ASIA | East Asia | Myanmar | Resident | Tamu         | 2014 | F446I | ttt to att | 151_H04 | 159_H05 | 151_H04/159_H05 | 73 |
| ASIA | East Asia | Myanmar | Resident | Tamu         | 2014 | F446I | ttt to att | 151_H05 | 159_H28 | 151_H05/159_H28 | 75 |
| ASIA | East Asia | Myanmar | Resident | Pyin Oo Lwin | 2014 | F446I | ttt to att | 151_H08 | 159_H28 | 151_H08/159_H28 | 77 |
| ASIA | East Asia | Myanmar | Resident | Tamu         | 2014 | F446I | ttt to att | 151_H08 | 159_H28 | 151_H08/159_H28 | 77 |
| ASIA | East Asia | Myanmar | Resident | Tamu         | 2014 | F446I | ttt to att | 151_H08 | 159_H28 | 151_H08/159_H28 | 77 |
| ASIA | East Asia | Myanmar | Resident | Tamu         | 2014 | F446I | ttt to att | 151_H08 | 159_H28 | 151_H08/159_H28 | 77 |
| ASIA | East Asia | Myanmar | Resident | Tamu         | 2014 | F446I | ttt to att | 151_H08 | 159_H28 | 151_H08/159_H28 | 77 |
| ASIA | East Asia | Myanmar | Resident | Tamu         | 2014 | F446I | ttt to att | 151_H08 | 159_H42 | 151_H08/159_H42 | 79 |
| ASIA | East Asia | Myanmar | Resident | Pyin Oo Lwin | 2014 | F446I | ttt to att | 151_H09 | 159_H35 | 151_H09/159_H35 | 80 |
| ASIA | East Asia | Myanmar | Resident | Tamu         | 2014 | F446I | ttt to att | 151_H09 | 159_H35 | 151_H09/159_H35 | 80 |

#### N458Y

| Continent | Region    | Country | Resident /Travelers | Sample Location | Year of collection | K13 allele | Nucleotide change | K13_151 allele | K13_159 allele | Haplotypes      | Flanking Haplotype_ID |
|-----------|-----------|---------|---------------------|-----------------|--------------------|------------|-------------------|----------------|----------------|-----------------|-----------------------|
| ASIA      | East Asia | Myanmar | Resident            | Pyin Oo Lwin    | 2014               | N458Y      | aat to tat        | 151_H05        | 159_H21        | 151_H05/159_H21 | 76                    |
| ASIA      | East Asia | Myanmar | Resident            | Pyin Oo Lwin    | 2014               | N458Y      | aat to tat        | 151_H05        | 159_H40        | 151_H05/159_H40 | 78                    |
| ASIA      | East Asia | Myanmar | Resident            | Pyin Oo Lwin    | 2014               | N458Y      | aat to tat        | 151_H05        | 159_H40        | 151_H05/159_H40 | 78                    |
| ASIA      | East Asia | Myanmar | Resident            | Pyin Oo Lwin    | 2014               | N458Y      | aat to tat        | 151_H05        | 159_H40        | 151_H05/159_H40 | 78                    |

#### R561H

| Continent | Region    | Country | Resident /Travelers | Sample Location | Year of collection | K13 allele | Nucleotide change | K13_151 allele | K13_159 allele | Haplotypes      | Flanking Haplotype_ID |
|-----------|-----------|---------|---------------------|-----------------|--------------------|------------|-------------------|----------------|----------------|-----------------|-----------------------|
| ASIA      | East Asia | Myanmar | Resident            | Pyin Oo Lwin    | 2014               | R561H      | cgt to cat        | 151_3D7        | 159_H40        | 151_3D7/159_H40 | 72                    |
| ASIA      | East Asia | Myanmar | Resident            | Pyin Oo Lwin    | 2014               | R561H      | cgt to cat        | 151_3D7        | 159_H40        | 151_3D7/159_H40 | 72                    |
| ASIA      | East Asia | Myanmar | Resident            | Pyin Oo Lwin    | 2014               | R561H      | cgt to cat        | 151_3D7        | 159_H40        | 151_3D7/159_H40 | 72                    |
| ASIA      | East Asia | Myanmar | Resident            | Pyin Oo Lwin    | 2014               | R561H      | cgt to cat        | 151_3D7        | 159_H40        | 151_3D7/159_H40 | 72                    |
| ASIA      | East Asia | Myanmar | Resident            | Tamu            | 2014               | R561H      | cgt to cat        | 151_3D7        | 159_H40        | 151_3D7/159_H40 | 72                    |
| ASIA      | East Asia | Myanmar | Resident            | Tamu            | 2014               | R561H      | cgt to cat        | 151_3D7        | 159_H40        | 151_3D7/159_H40 | 72                    |
| ASIA      | East Asia | Myanmar | Resident            | Tamu            | 2014               | R561H      | cgt to cat        | 151_3D7        | 159_H40        | 151_3D7/159_H40 | 72                    |
| ASIA      | East Asia | Myanmar | Resident            | Pyin Oo Lwin    | 2014               | R561H      | cgt to cat        | 151_H08        | 159_H41        | 151_H08/159_H41 | 80                    |

|      |           |         |          |              |      |       |            |         |         |                 |    |
|------|-----------|---------|----------|--------------|------|-------|------------|---------|---------|-----------------|----|
| ASIA | East Asia | Myanmar | Resident | Pyin Oo Lwin | 2014 | R561H | cgt to cat | 151_H08 | 159_H41 | 151_H08/159_H41 | 80 |
| ASIA | East Asia | Myanmar | Resident | Tamu         | 2014 | R561H | cgt to cat | 151_H08 | 159_H41 | 151_H08/159_H41 | 80 |
| ASIA | East Asia | Myanmar | Resident | Tamu         | 2014 | R561H | cgt to cat | 151_H08 | 159_H41 | 151_H08/159_H41 | 80 |

## A578S

| Continent | Region          | Country    | Resident /Travelers | Sample Location         | Year of collection | K13 allele | Nucleotide change | K13_151 allele | K13_159 allele | Haplotypes      | Flanking Haplotype_ID |
|-----------|-----------------|------------|---------------------|-------------------------|--------------------|------------|-------------------|----------------|----------------|-----------------|-----------------------|
| AFRICA    | West Africa     | Ivory Cost | Resident            | NA                      | 2013               | A578S      | gct to tct        | 151_3D7        | 159_H07        | 151_3D7/159_H07 | 2                     |
| AFRICA    | Central Africa  | Chad       | Traveler            | NA                      | 2013               | A578S      | gct to tct        | 151_3D7        | 159_H10        | 151_3D7/159_H10 | 4                     |
| AFRICA    | Indian Ocean    | Comoros    | Resident            | Grande Comore_Foumbouni | 2011               | A578S      | gct to tct        | 151_3D7        | 159_H11        | 151_3D7/159_H11 | 5                     |
| AFRICA    | Indian Ocean    | Comoros    | Resident            | Grande Comore_Moroni    | 2011               | A578S      | gct to tct        | 151_3D7        | 159_H11        | 151_3D7/159_H11 | 5                     |
| AFRICA    | East Africa     | Kenya      | Resident            | Ahero                   | 2011               | A578S      | gct to tct        | 151_3D7        | 159_H12        | 151_3D7/159_H12 | 6                     |
| AFRICA    | Central Africa  | Cameroon   | Resident            | NA                      | 2013               | A578S      | gct to tct        | 151_3D7        | 159_H13        | 151_3D7/159_H13 | 7                     |
| AFRICA    | West Africa     | Guinea     | Traveler            | NA                      | 2014               | A578S      | gtc to atc        | 151_3D7        | 159_H14        | 151_3D7/159_H14 | 8                     |
| AFRICA    | Central Africa  | DRC        | Resident            | Kinshasa                | 2013               | A578S      | gct to tct        | 151_3D7        | 159_H16        | 151_3D7/159_H16 | 9                     |
| AFRICA    | Indian Ocean    | Comoros    | Resident            | Grande Comore_Moroni    | 2013               | A578S      | gct to tct        | 151_3D7        | 159_H17        | 151_3D7/159_H17 | 10                    |
| AFRICA    | West Africa     | Ivory Cost | Resident            | NA                      | 2014               | A578S      | gtc to atc        | 151_3D7        | 159_H19        | 151_3D7/159_H19 | 11                    |
| AFRICA    | West Africa     | Niger      | Resident            | Maradi, Madarounfa      | 2013               | A578S      | gct to tct        | 151_3D7        | 159_H20        | 151_3D7/159_H20 | 12                    |
| AFRICA    | West Africa     | Benin      | Traveler            | NA                      | 2014               | A578S      | gct to tct        | 151_3D7        | 159_H21        | 151_3D7/159_H21 | 13                    |
| AFRICA    | West Africa     | Niger      | Resident            | Niamey                  | 2013               | A578S      | gct to tct        | 151_3D7        | 159_H22        | 151_3D7/159_H22 | 14                    |
| AFRICA    | East Africa     | Kenya      | Resident            | Ahero                   | 2013               | A578S/WT   | gct to tct        | 151_3D7        | 159_H23        | 151_3D7/159_H23 | 15                    |
| AFRICA    | West Africa     | Niger      | Resident            | Niamey                  | 2013               | A578S      | gct to tct        | 151_3D7        | 159_H23        | 151_3D7/159_H23 | 15                    |
| AFRICA    | Central Africa  | DRC        | Resident            | Kinshasa                | 2013               | A578S      | gct to tct        | 151_3D7        | 159_H25        | 151_3D7/159_H25 | 16                    |
| AFRICA    | Central Africa  | Cameroon   | Resident            | Yaounde                 | 2013               | A578S      | gct to tct        | 151_3D7        | 159_H26        | 151_3D7/159_H26 | 17                    |
| AFRICA    | Southern Africa | Zambia     | Resident            | NA                      | 2012               | A578S      | gct to tct        | 151_3D7        | 159_H27        | 151_3D7/159_H27 | 18                    |
| AFRICA    | West Africa     | Guinea     | Traveler            | NA                      | 2013               | A578S      | gct to tct        | 151_3D7        | 159_H28        | 151_3D7/159_H28 | 19                    |
| AFRICA    | West Africa     | Niger      | Resident            | Maradi, Madarounfa      | 2013               | A578S      | gct to tct        | 151_3D7        | 159_H28        | 151_3D7/159_H28 | 19                    |

|        |                |              |          |                         |           |          |            |         |         |                 |    |
|--------|----------------|--------------|----------|-------------------------|-----------|----------|------------|---------|---------|-----------------|----|
| AFRICA | West Africa    | Burkina Faso | Resident | Colsama                 | 2012      | A578S/WT | gct to tct | 151_3D7 | 159_H29 | 151_3D7/159_H29 | 20 |
| AFRICA | West Africa    | Mali         | Resident | NA                      | 2013      | A578S/WT | gct to tct | 151_3D7 | 159_H30 | 151_3D7/159_H30 | 21 |
| AFRICA | Central Africa | Cameroon     | Resident | Yaounde                 | 2013      | A578S    | gct to tct | 151_3D7 | 159_H31 | 151_3D7/159_H31 | 22 |
| AFRICA | Central Africa | CAR          | Resident | Bangui                  | 2009      | A578S    | gct to tct | 151_3D7 | 159_H31 | 151_3D7/159_H31 | 22 |
| AFRICA | East Africa    | Uganda       | Resident | Mbarara                 | 2010      | A578S    | gct to tct | 151_3D7 | 159_H32 | 151_3D7/159_H32 | 23 |
| AFRICA | East Africa    | Uganda       | Resident | Mbarara                 | 2010      | A578S    | gct to tct | 151_3D7 | 159_H33 | 151_3D7/159_H33 | 24 |
| AFRICA | East Africa    | Uganda       | Resident | Mbarara                 | 2010      | A578S    | gct to tct | 151_3D7 | 159_H37 | 151_3D7/159_H37 | 26 |
| AFRICA | Central Africa | Cameroon     | Resident | NA                      | 2013      | A578S    | gct to tct | 151_H02 | 159_H23 | 151_H02/159_H23 | 28 |
| AFRICA | East Africa    | Kenya        | Resident | Ahero                   | 2012      | A578S    | gct to tct | 151_H06 | 159_H24 | 151_H06/159_H24 | 39 |
| AFRICA | East Africa    | Kenya        | Resident | Ahero                   | 2012      | A578S    | gct to tct | 151_H07 | 159_H18 | 151_H07/159_H18 | 47 |
| AFRICA | Central Africa | DRC          | Resident | Kinshasa                | 2013      | A578S    | gct to tct | 151_H07 | 159_H23 | 151_H07/159_H23 | 48 |
| AFRICA | Indian Ocean   | Comoros      | Resident | Grande Comore_Foumbouni | 2013      | A578S    | gct to tct | 151_H07 | 159_H35 | 151_H07/159_H35 | 52 |
| ASIA   | Southeast Asia | Thailand     | Resident | Mae Sot                 | 2009      | A578S    | gct to tct | 151_H08 | 159_H10 | 151_H08/159_H10 | 58 |
| ASIA   | Southeast Asia | Bangladesh   | Resident | Khagrachari             | 2009-2013 | A578S    | gct to tct | 151_H04 | 159_H38 | 151_H04/159_H38 | 69 |
| ASIA   | Southeast Asia | Bangladesh   | Resident | Khagrachari             | 2009-2013 | A578S    | gct to tct | 151_3D7 | 159_H38 | 151_3D7/159_H38 | 70 |

### S522C

| Continent | Region         | Country | Resident /Travelers | Sample Location | Year of collection | K13 allele | Nucleotide change | K13_151 allele | K13_159 allele | Haplotypes      | Flanking Haplotype_ID |
|-----------|----------------|---------|---------------------|-----------------|--------------------|------------|-------------------|----------------|----------------|-----------------|-----------------------|
| AFRICA    | East Africa    | Kenya   | Resident            | Ahero           | 2012               | S522C      | agt to tgt        | 151_3D7        | 159_H20        | 151_3D7/159_H20 | 12                    |
| AFRICA    | Central Africa | Gabon   | Traveler            | NA              | 2013               | S522C      | gct to tct        | 151_3D7        | 159_H23        | 151_3D7/159_H23 | 15                    |
| AFRICA    | Central Africa | CAR     | Traveler            | NA              | 2013               | S522C/WT   | agt to tgt        | 151_3D7        | 159_H36        | 151_3D7/159_H36 | 25                    |

### V589I

| Continent | Region         | Country      | Resident /Travelers | Sample Location | Year of collection | K13 allele | Nucleotide change | K13_151 allele | K13_159 allele | Haplotypes      | Flanking Haplotype_ID |
|-----------|----------------|--------------|---------------------|-----------------|--------------------|------------|-------------------|----------------|----------------|-----------------|-----------------------|
| AFRICA    | West Africa    | Burkina Faso | Resident            | Colsama         | 2012               | V589I      | gtc to atc        | 151_3D7        | 159_H23        | 151_3D7/159_H23 | 15                    |
| AFRICA    | Central Africa | CAR          | Resident            | Bangui          | 2009               | V589I      | gtc to atc        | 151_3D7        | 159_H23        | 151_3D7/159_H23 | 15                    |

|        |                |            |          |           |      |          |            |         |         |                 |    |
|--------|----------------|------------|----------|-----------|------|----------|------------|---------|---------|-----------------|----|
| AFRICA | Indian Ocean   | Madagascar | Resident | Toamasina | 2012 | V589I    | gtc to atc | 151_3D7 | 159_H23 | 151_3D7/159_H23 | 15 |
| AFRICA | Central Africa | Cameroon   | Resident |           | 2013 | V589I/WT | gtc to atc | 151_3D7 | 159_H23 | 151_3D7/159_H23 | 15 |

---

NA: Not available

**Table S10.** List of the flanking haplotypes shared by different K13 NS-mutations by continent and country, KARMA study 2014-2015.

| <b>Flanking Haplotype ID</b> | <b>K13 allele (No. of isolates)</b> |            | <b>Continental distribution</b> | <b>Country location</b> |                                                        |
|------------------------------|-------------------------------------|------------|---------------------------------|-------------------------|--------------------------------------------------------|
| <b>12</b>                    | A578S (1)                           | S522C (1)  | African background              | Niger/Kenya             |                                                        |
| <b>15</b>                    | A578S (2)                           | S522C (1)  | V589I (4)                       | African background      | Niger/Kenya/Gabon/Burkina Faso/CAR/Madagascar/Cameroon |
| <b>19</b>                    | F446I (1)                           | A578S (2)  | Asian/African background        | Niger/Guinea/Myanmar    |                                                        |
| <b>32</b>                    | F446I (1)                           | P553L (2)  | Asian background                | China/Vietnam           |                                                        |
| <b>43</b>                    | C580Y (17)                          | R539T (26) | Y493H (1)                       | Asian background        | Cambodia/Vietnam                                       |
| <b>45</b>                    | C580Y (1)                           | I543T (6)  | Asian background                | Cambodia/Vietnam        |                                                        |
| <b>50</b>                    | C580Y (1)                           | P574L (2)  | Asian background                | Cambodia/Thailand       |                                                        |
| <b>51</b>                    | C580Y (2)                           | Y493H (7)  | Asian background                | Cambodia/Vietnam        |                                                        |
| <b>52</b>                    | A578S (1)                           | Y493H (8)  | Asian/African background        | Cambodia/Comoros        |                                                        |
| <b>62</b>                    | C580Y (1)                           | R539T (2)  | Asian background                | Cambodia                |                                                        |
| <b>69</b>                    | A578S (1)                           | F446I (2)  | Asian background                | Bangladesh/Myanmar      |                                                        |
| <b>72</b>                    | F446I (2)                           | R561H      | Asian background                | Myanmar                 |                                                        |
